# Supplementary material for: Assessing the daily natural history of asymptomatic Plasmodium infections in adults and older children in Katakwi, Uganda: a longitudinal cohort study
Source: PubMed Central journal article supplement (PMC10790327; doi:10.1016/s2666-5247(23)00262-8), 2024-01

**Supplementary Appendix****Table of Contents**

| <b>Content</b>                                                                                                               | <b>Page</b> |
|------------------------------------------------------------------------------------------------------------------------------|-------------|
| Supplementary Table 1. Subsets of the data used to simulate alternate testing schedules.                                     | 1           |
| Plots of <i>Plasmodium</i> 18S rRNA biomarker log <sub>10</sub> copies/mL for each study participant with qRT-PCR positivity | 2-78        |

**Supplementary Table 1. Subsets of the data used to simulate alternate testing schedules.**

Windows were rolled in 1-day increments until the last day in the window coincided with the last day of the study (Day 28).

| <b>Window size</b> | <b>Schedule</b> | <b>First window</b> | <b>Last window</b> | <b>DBS per window</b> |
|--------------------|-----------------|---------------------|--------------------|-----------------------|
| <b>29-day</b>      | Q2D             | 0, 2, 4, ... 28     | NA                 | 15                    |
|                    | Q7D             | 0, 7, 14, 21, 28    | NA                 | 5                     |
|                    | Q14D            | 0, 14, 28           | NA                 | 3                     |
|                    | Q28D            | 0, 28               | NA                 | 2                     |
| <b>21-day</b>      | Q2D             | 0, 2, 4, ... 20     | 7, 9, 11, ... 27   | 11                    |
|                    | Q3D             | 0, 3, 6, ... 21     | 7, 10, 13, ... 28  | 8                     |
|                    | Q7D             | 0, 7, 14, 21        | 7, 14, 21, 28      | 4                     |
|                    | Q21D            | 0, 21               | 7, 28              | 2                     |
| <b>7-day</b>       | Q2D             | 0, 2, 4, 6, 7       | 21, 23, 25, 27, 28 | 5                     |
|                    | Q3D             | 0, 3, 6, 7          | 21, 24, 27, 28     | 4                     |
|                    | Q7D             | 0, 7                | 21, 28             | 2                     |
|                    | Once            | 7                   | 28                 | 1                     |

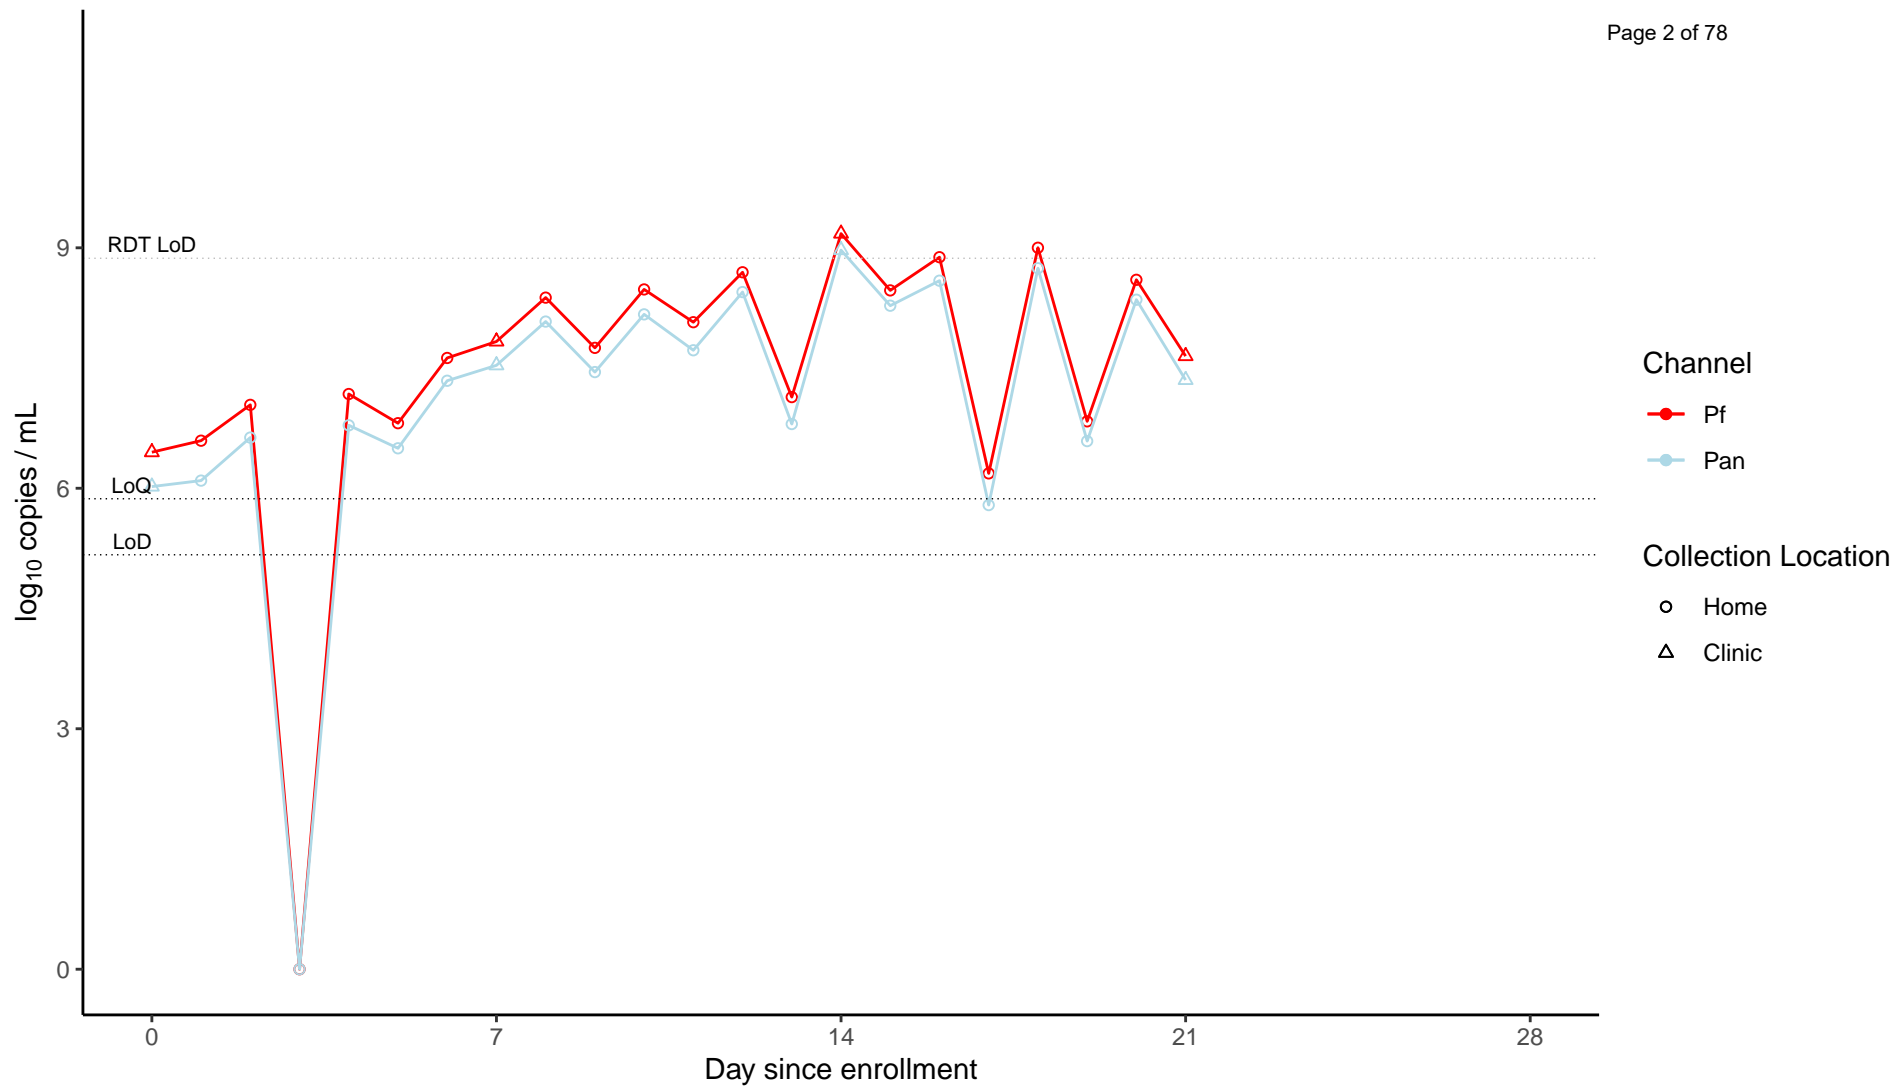

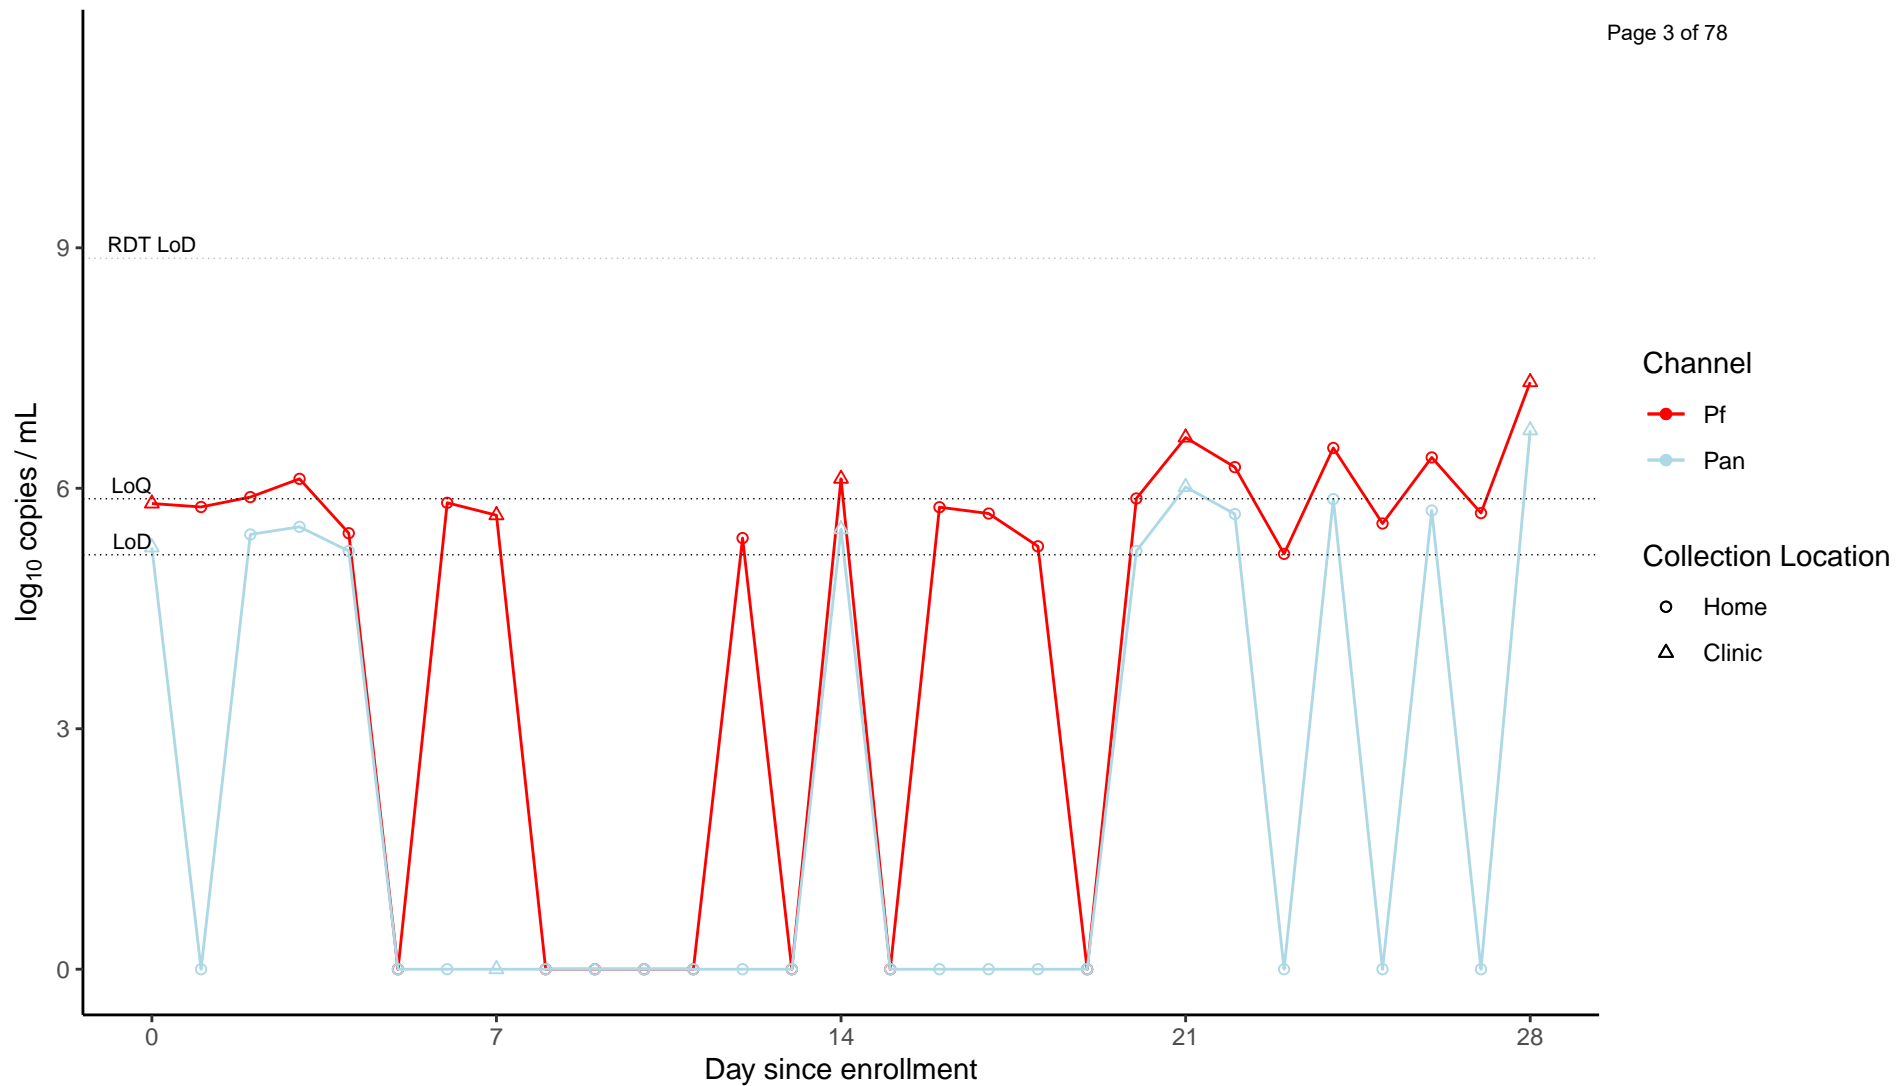

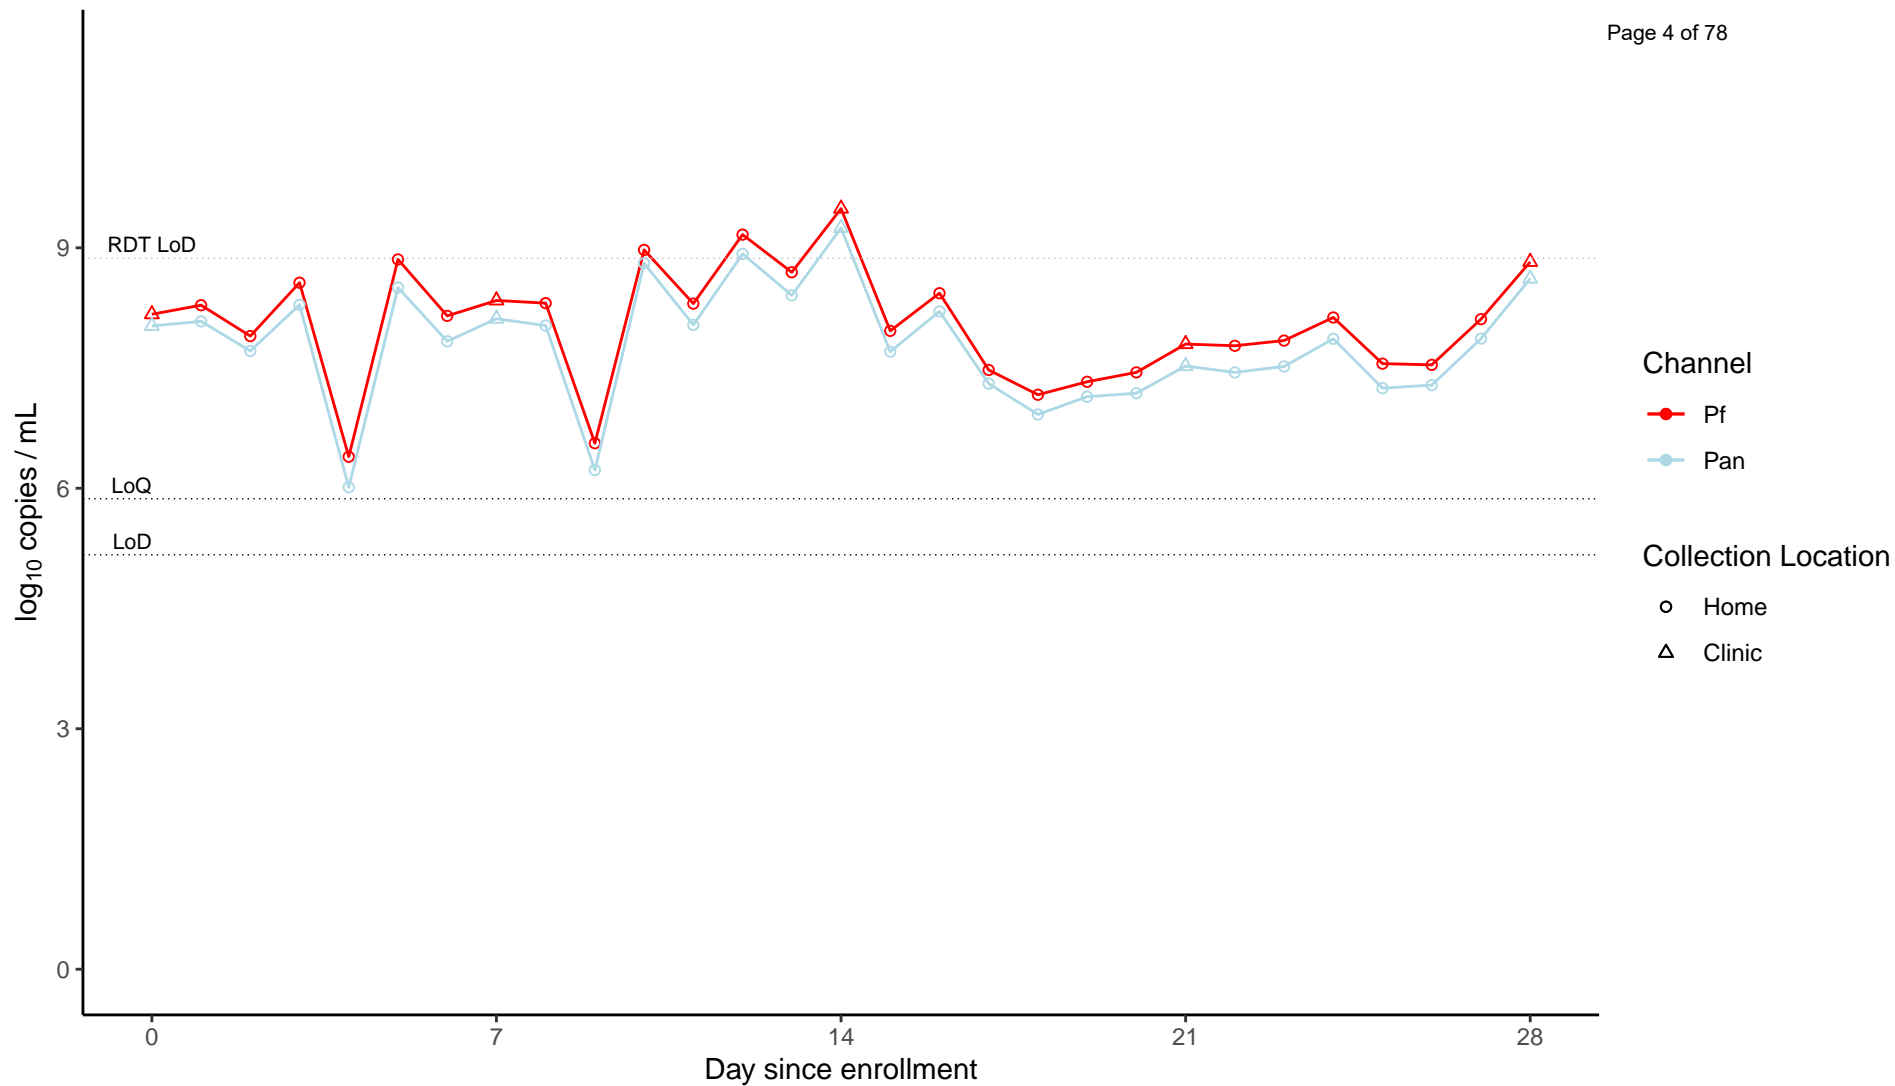

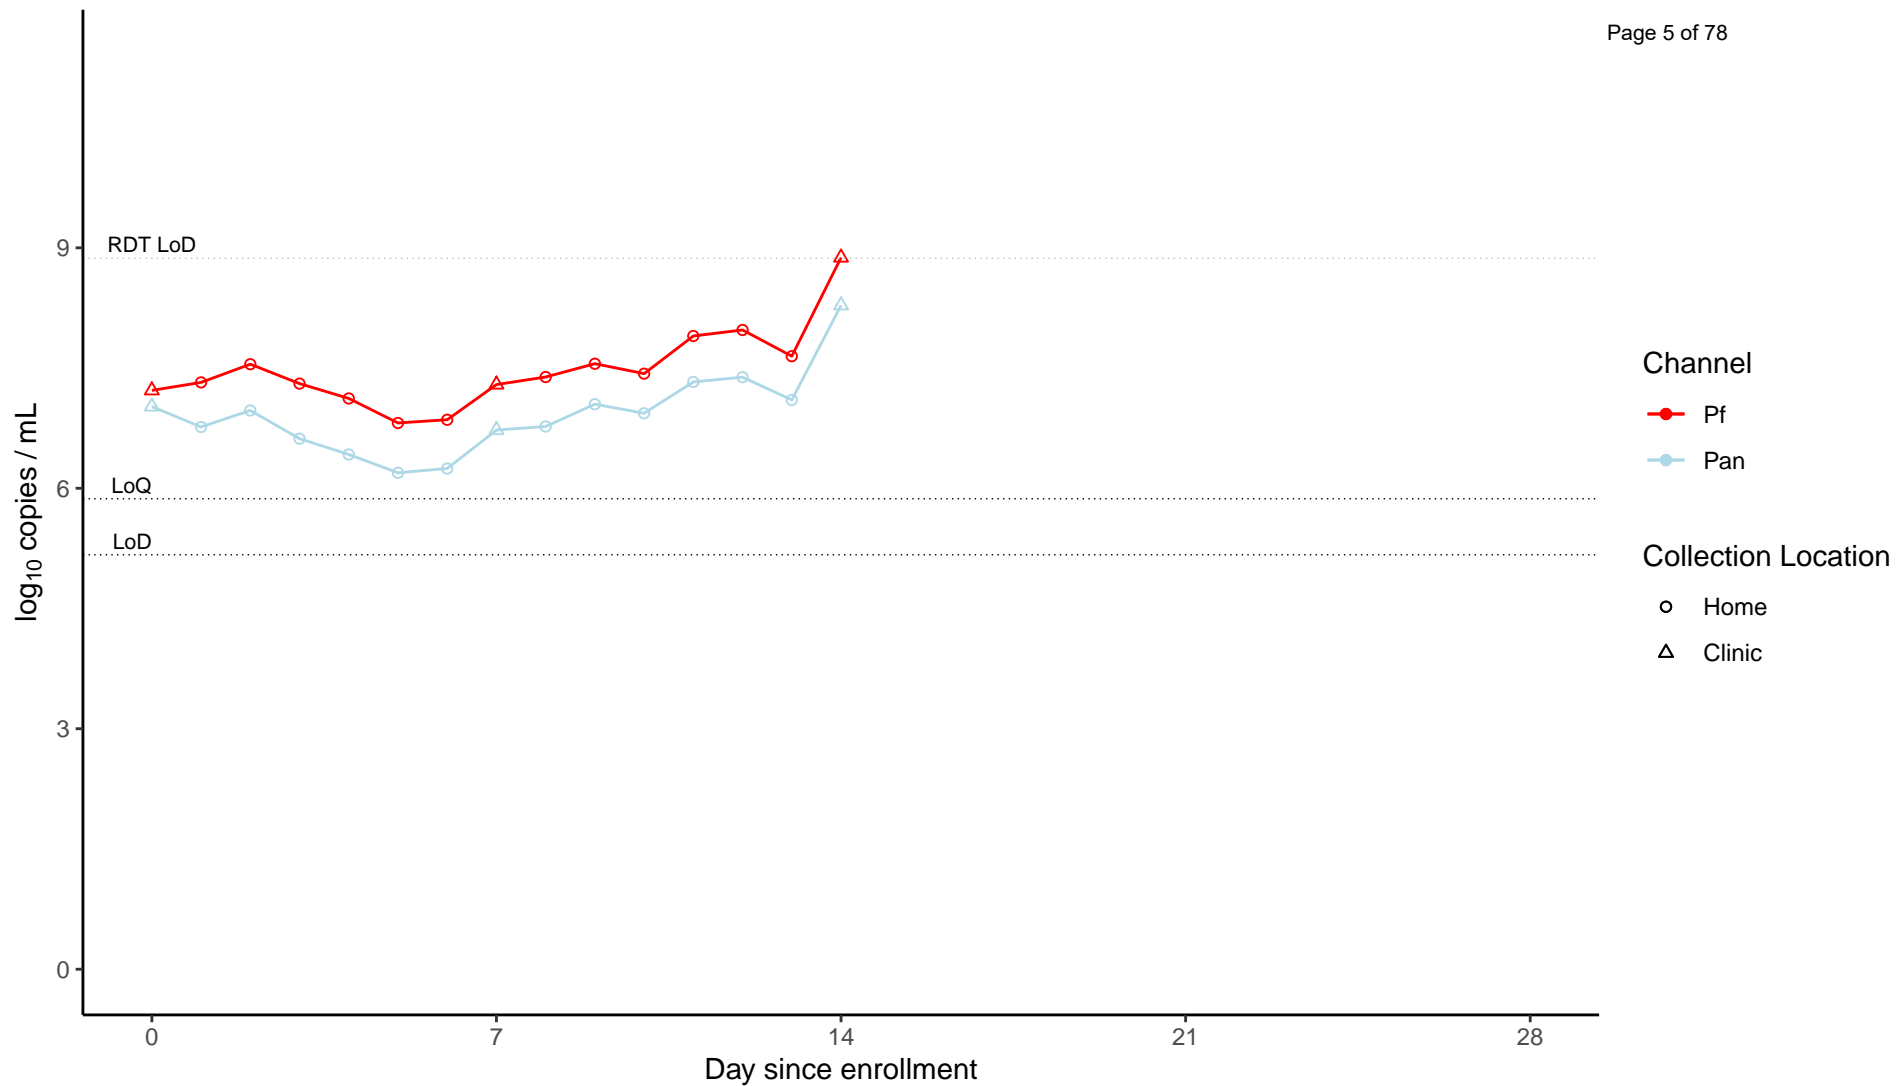

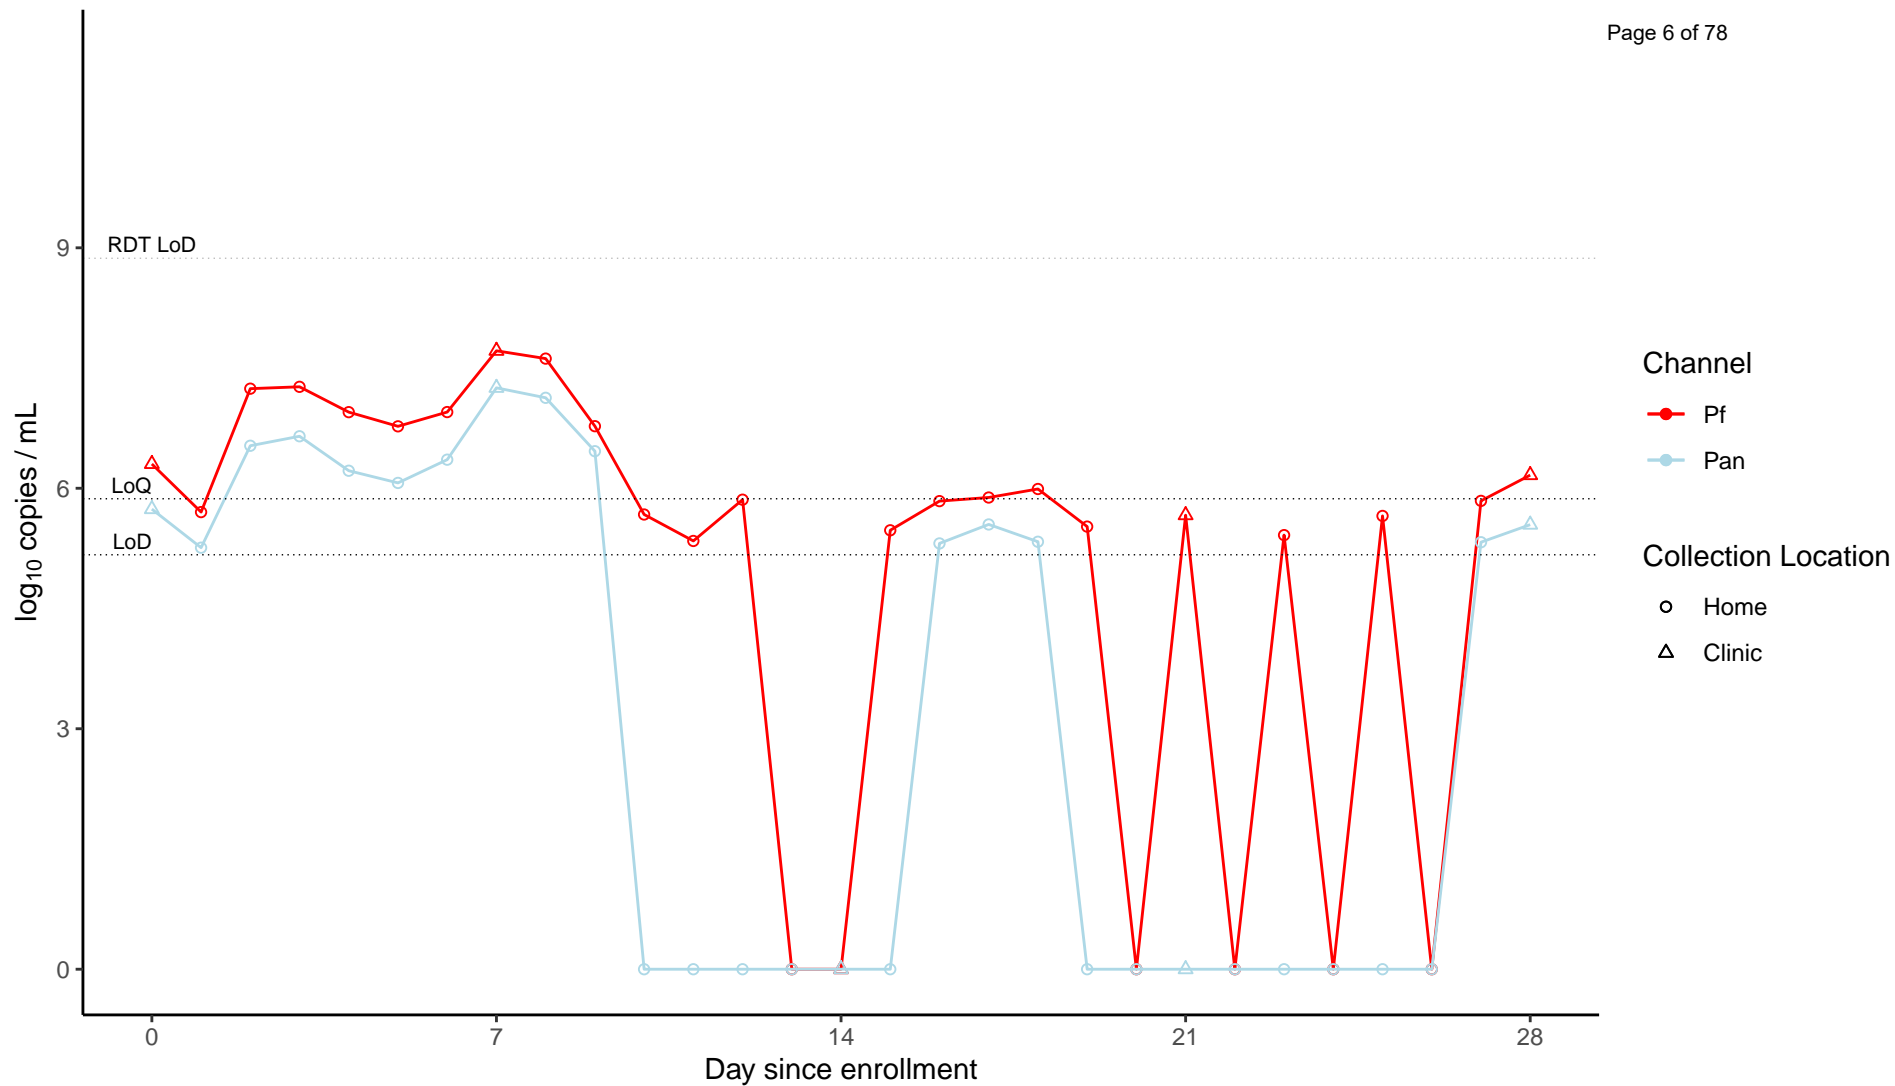

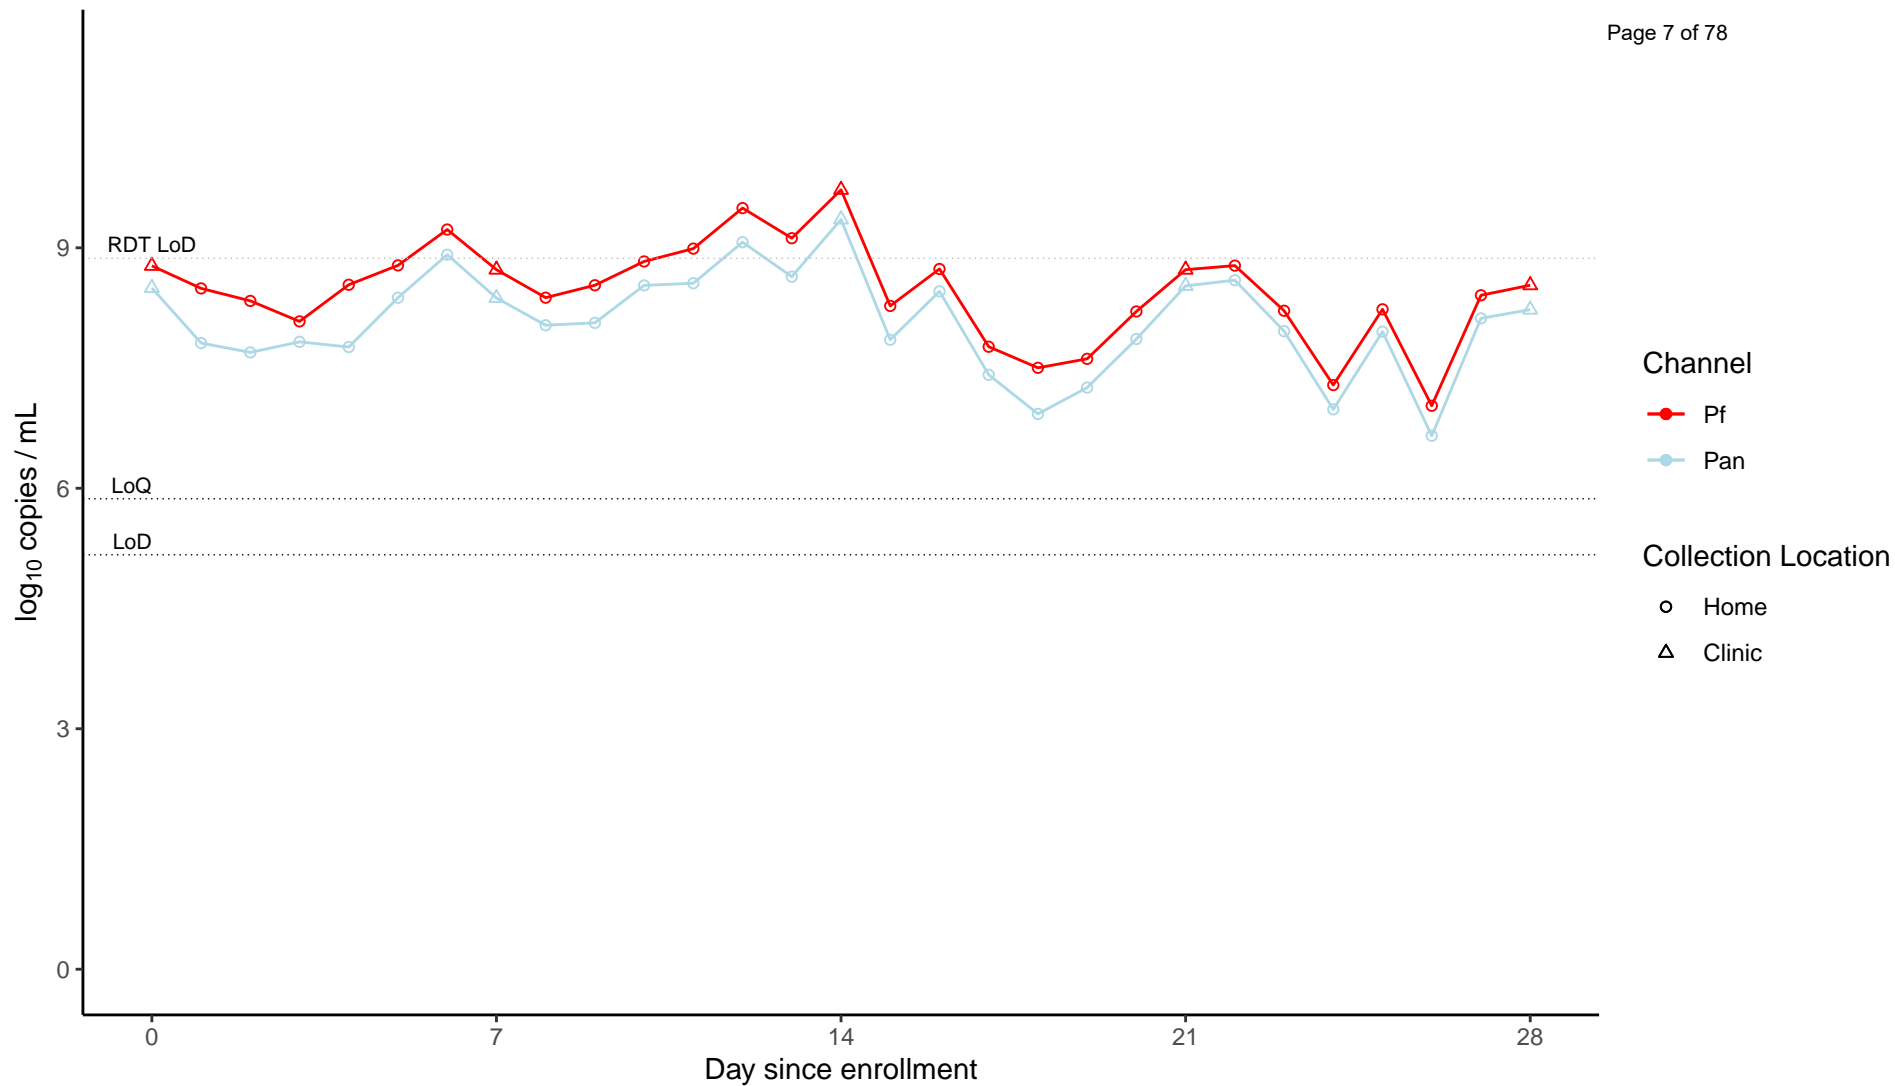



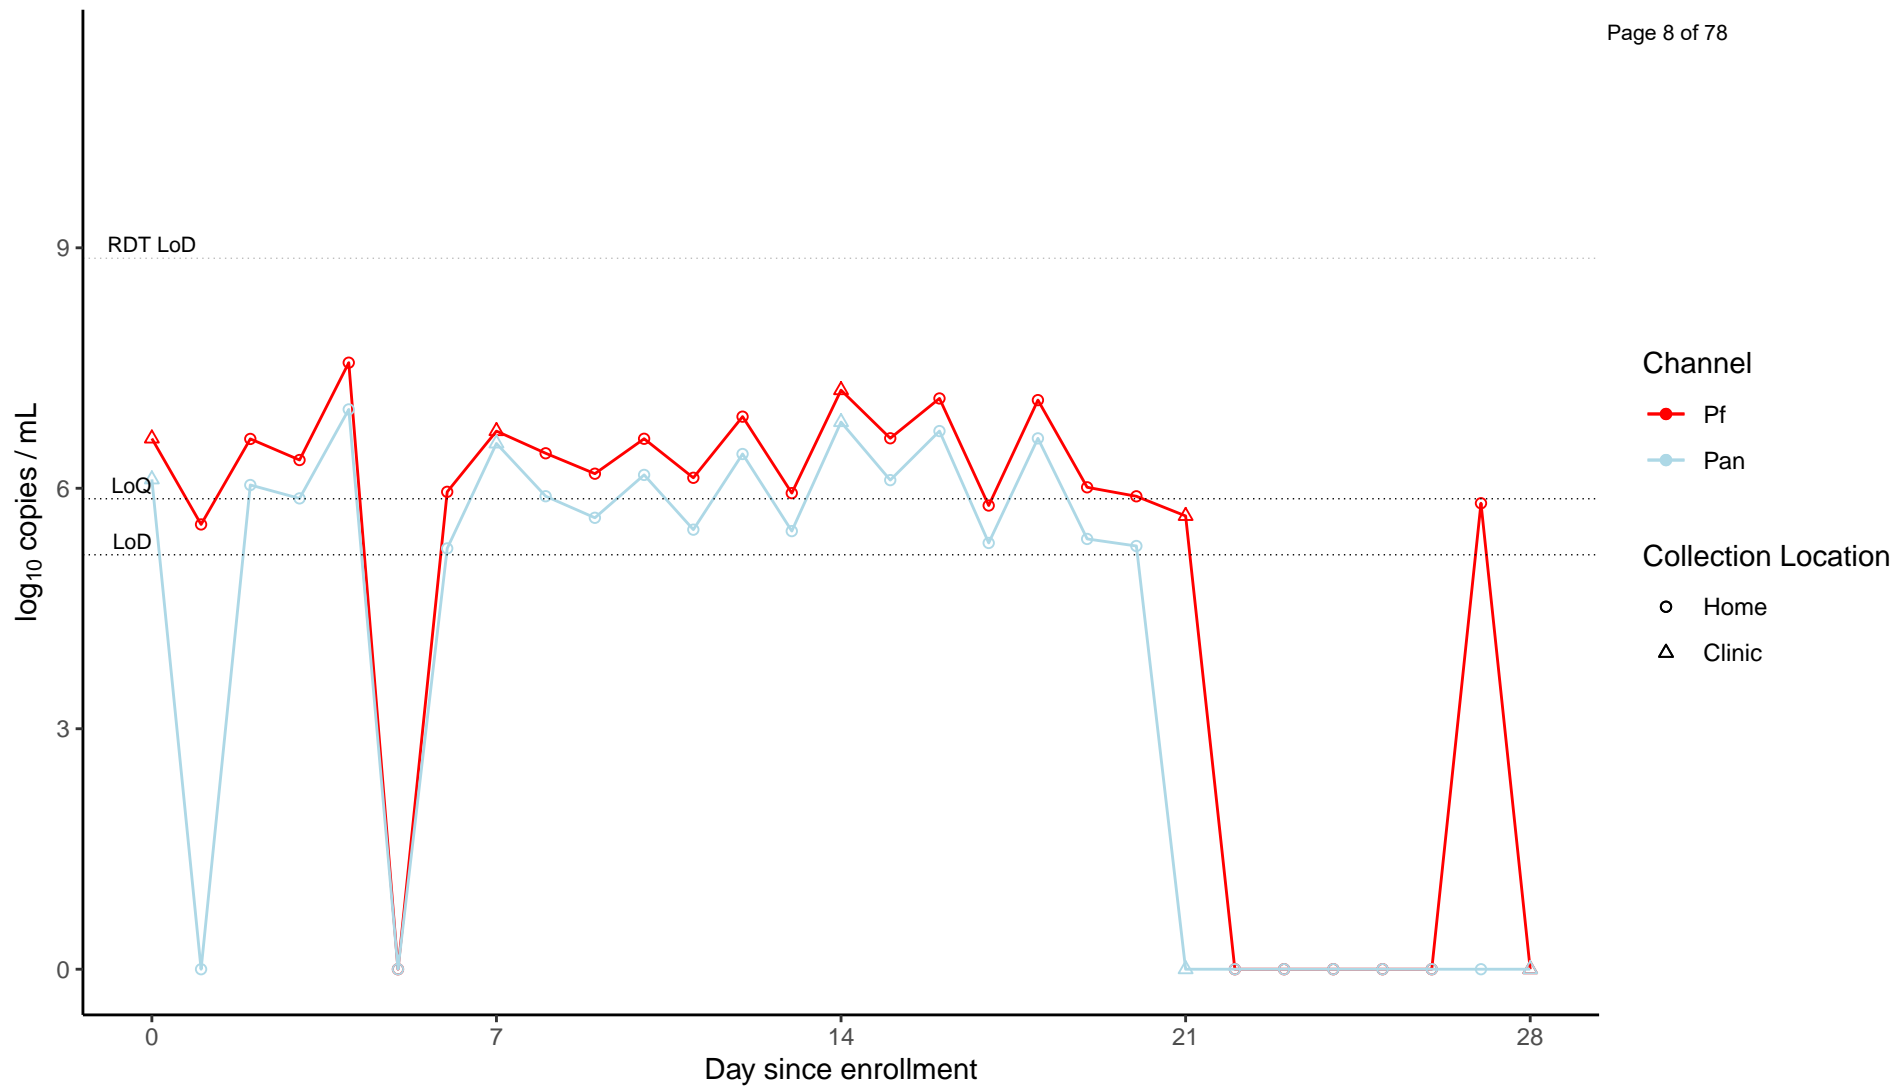

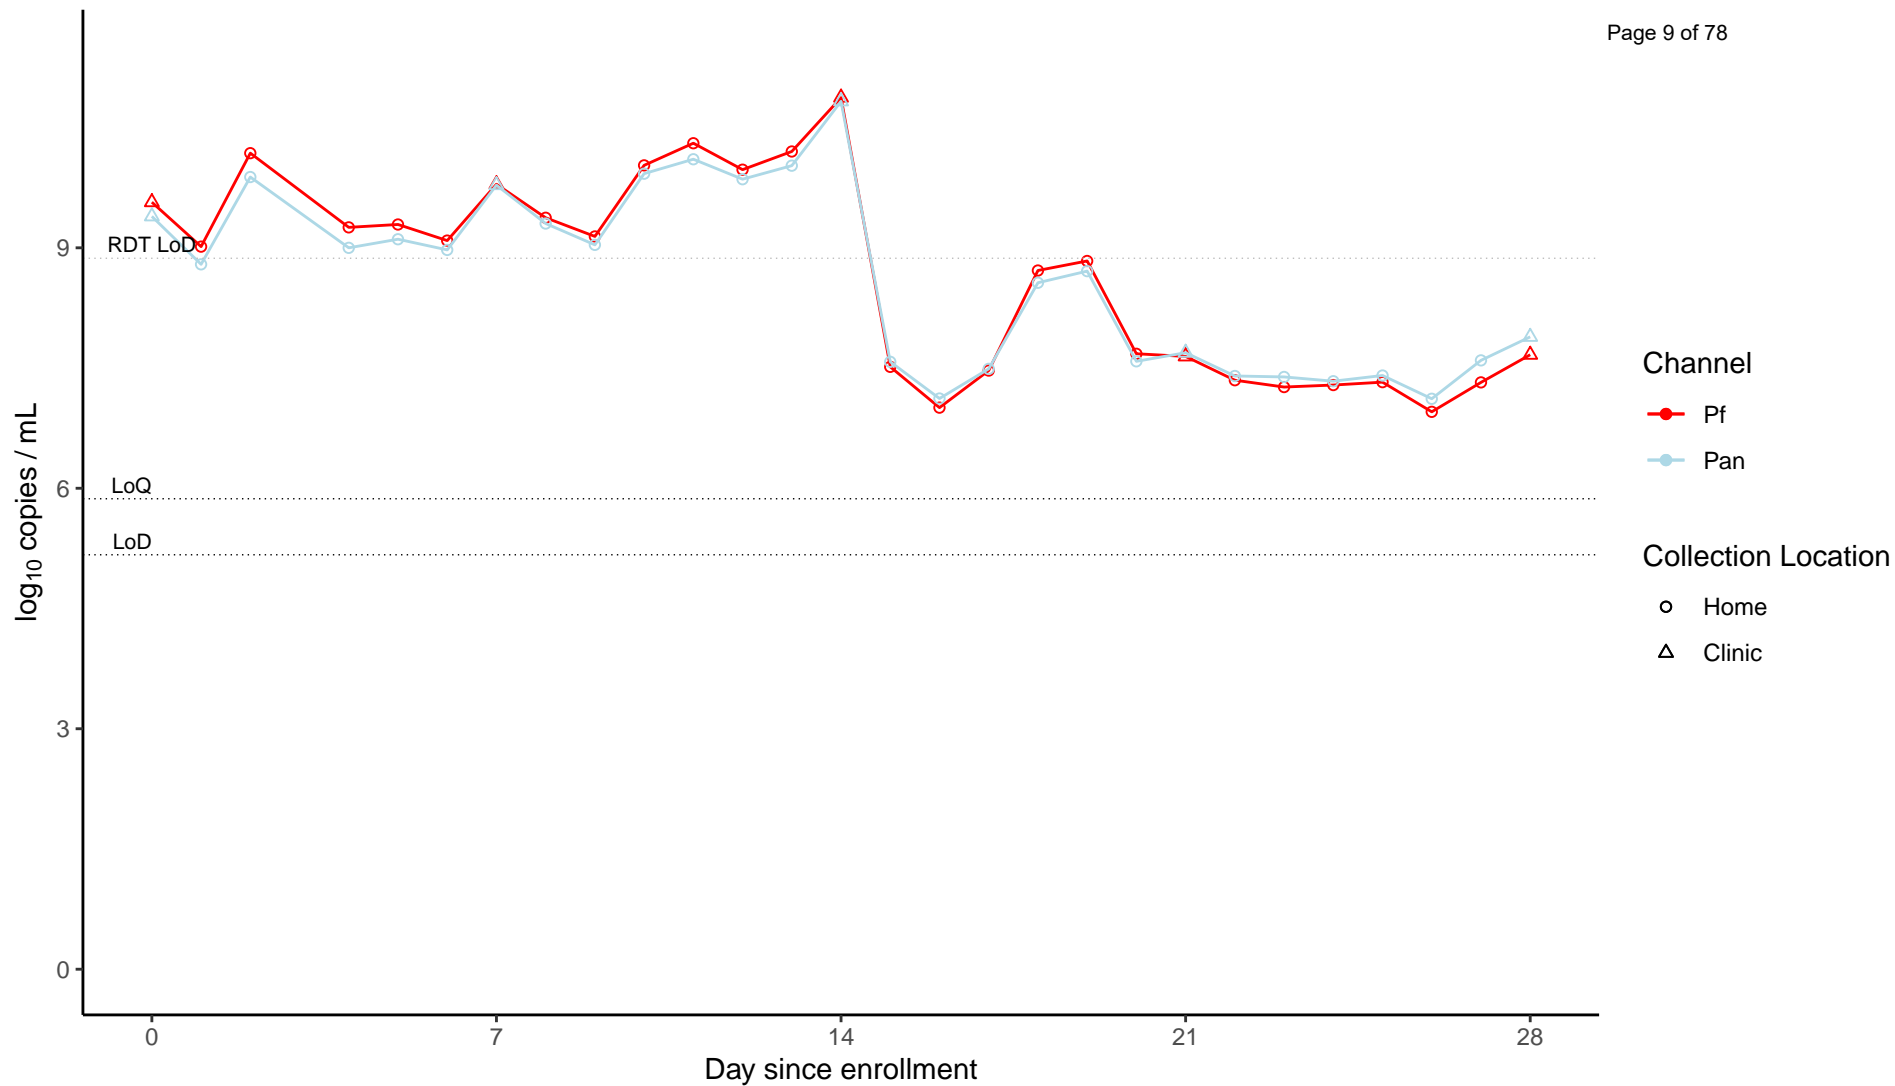

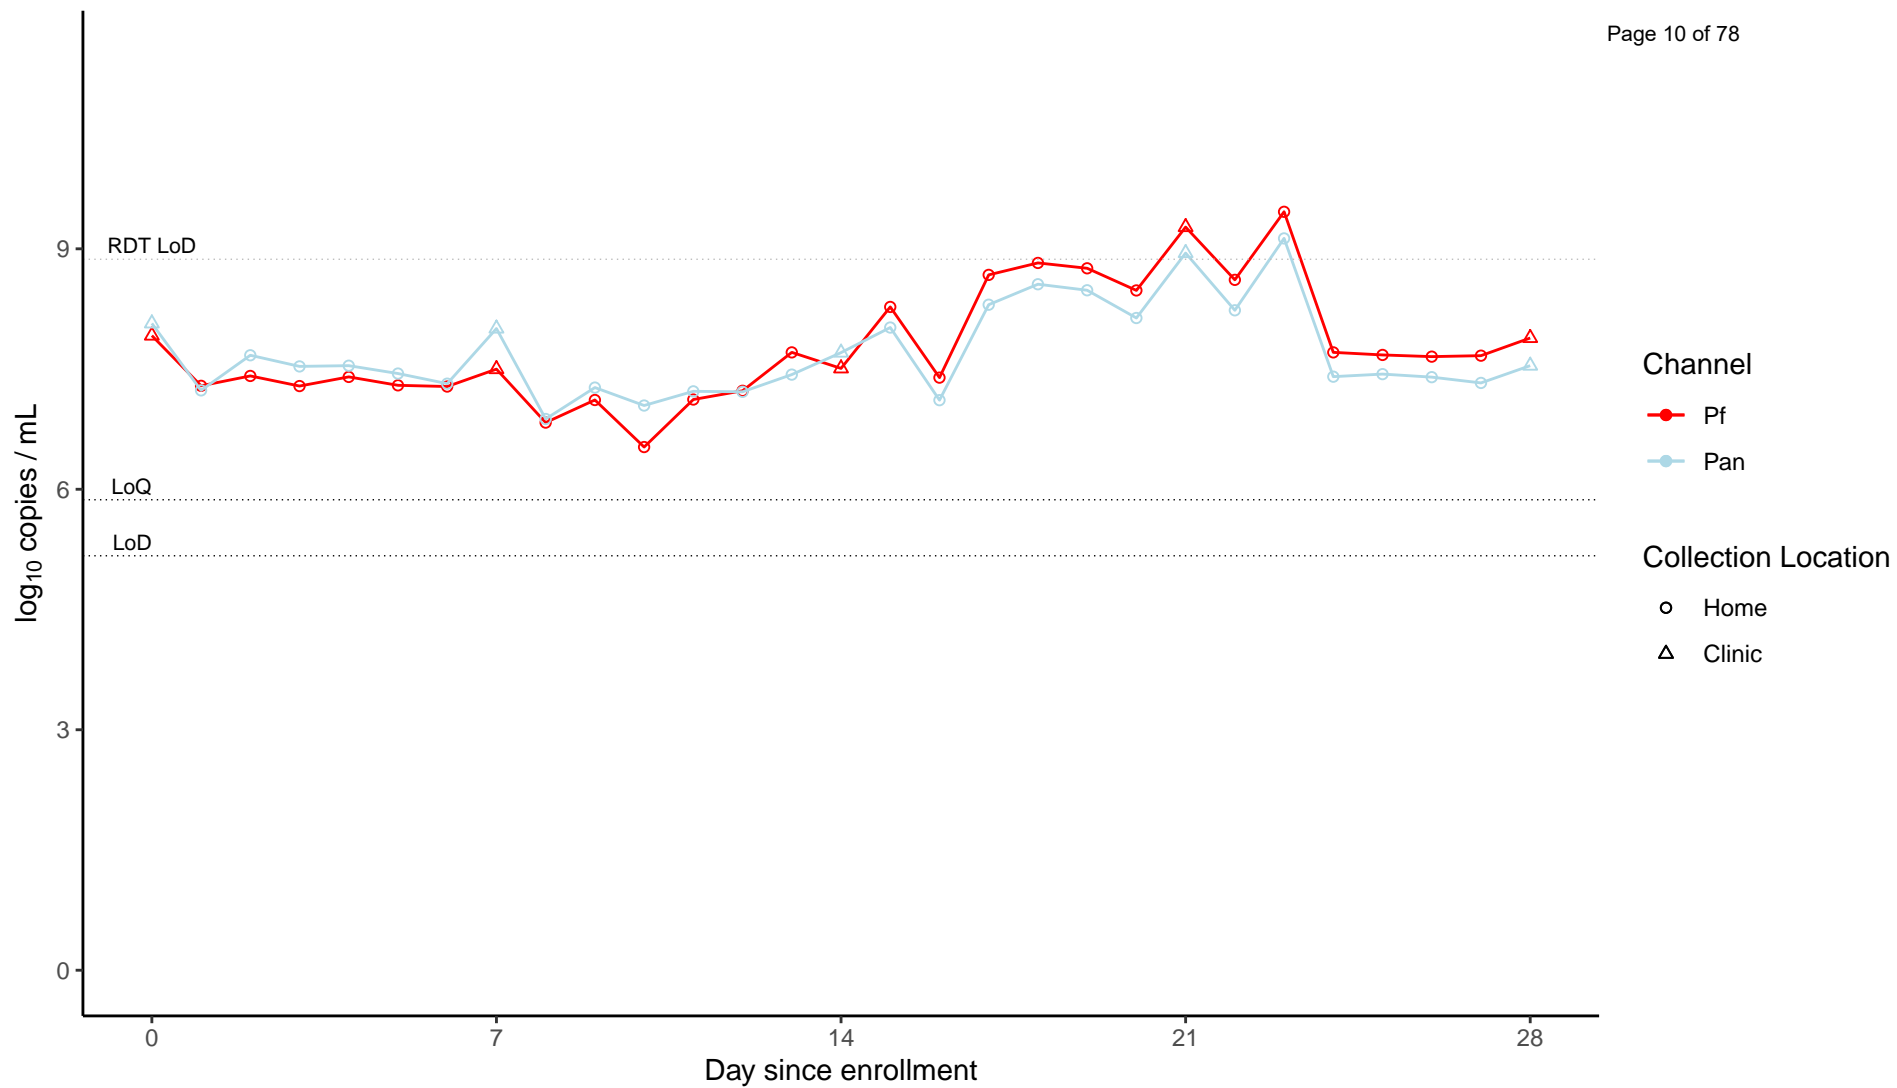

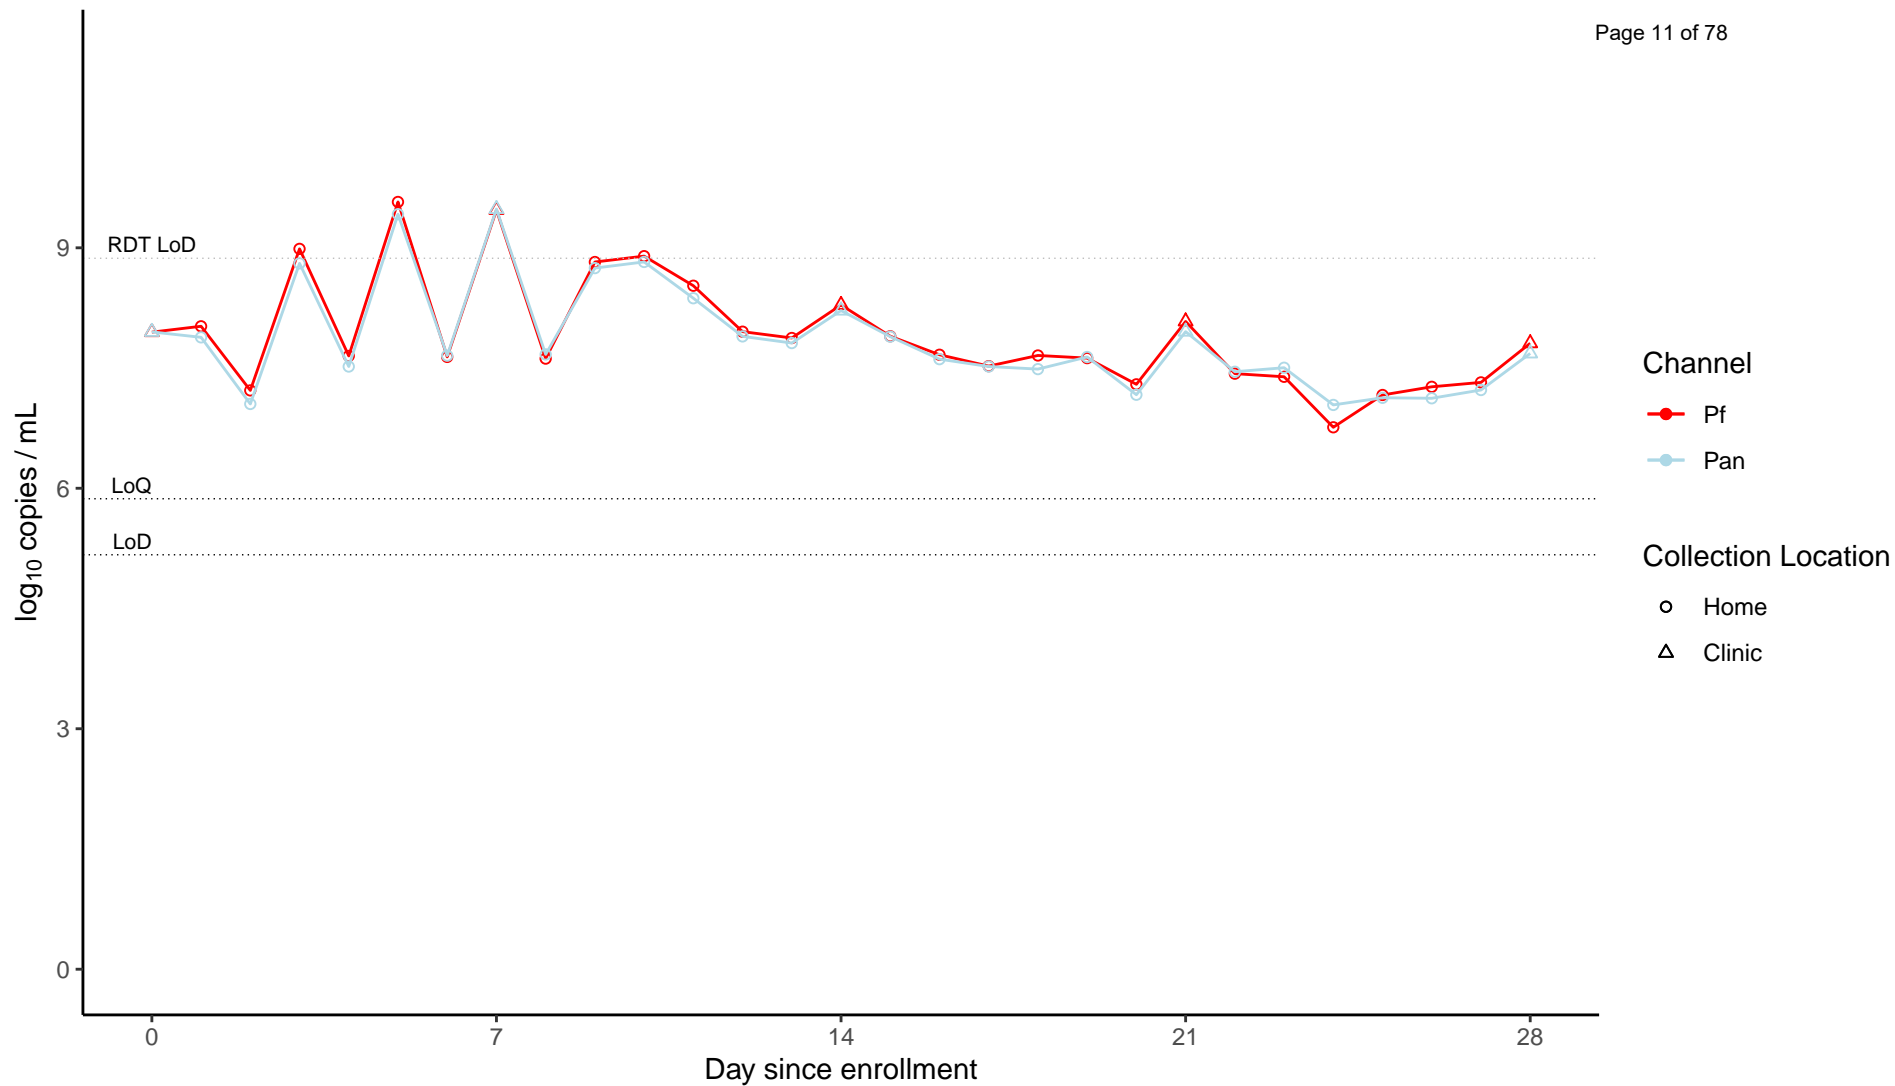

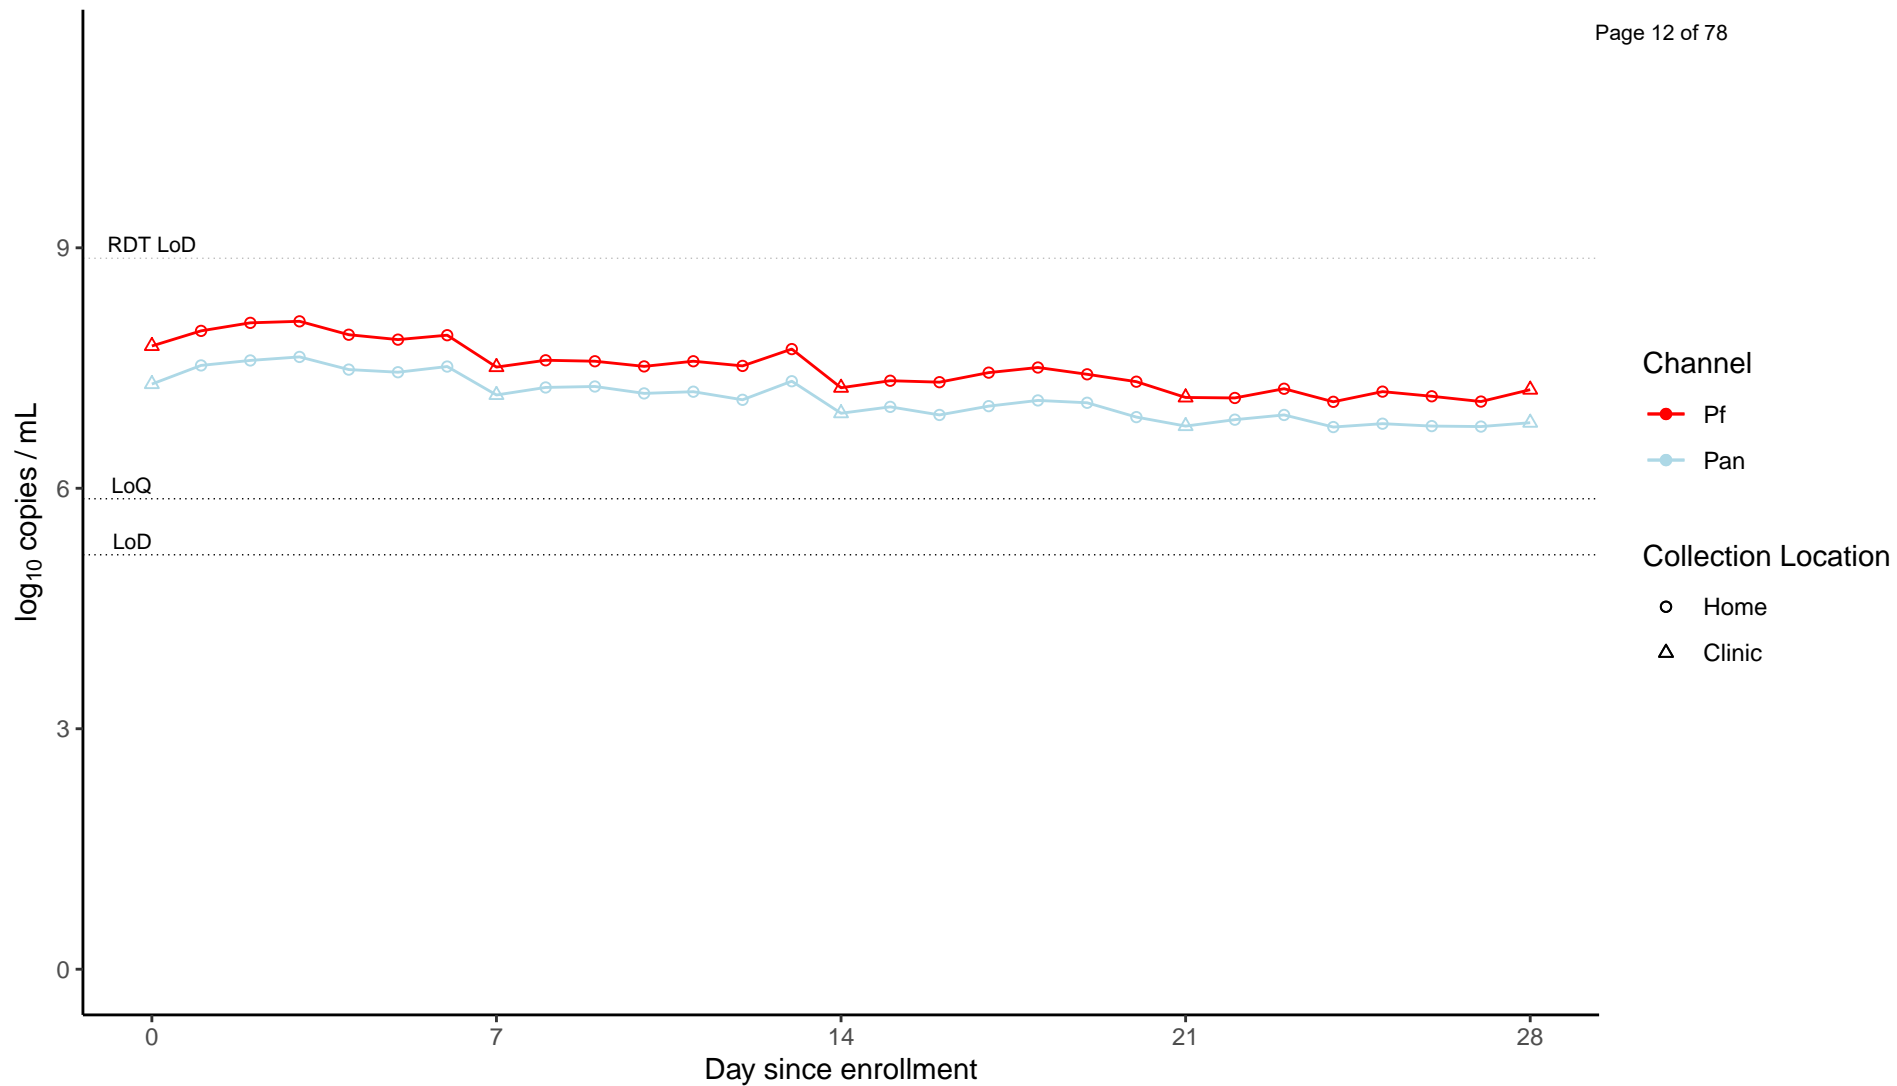

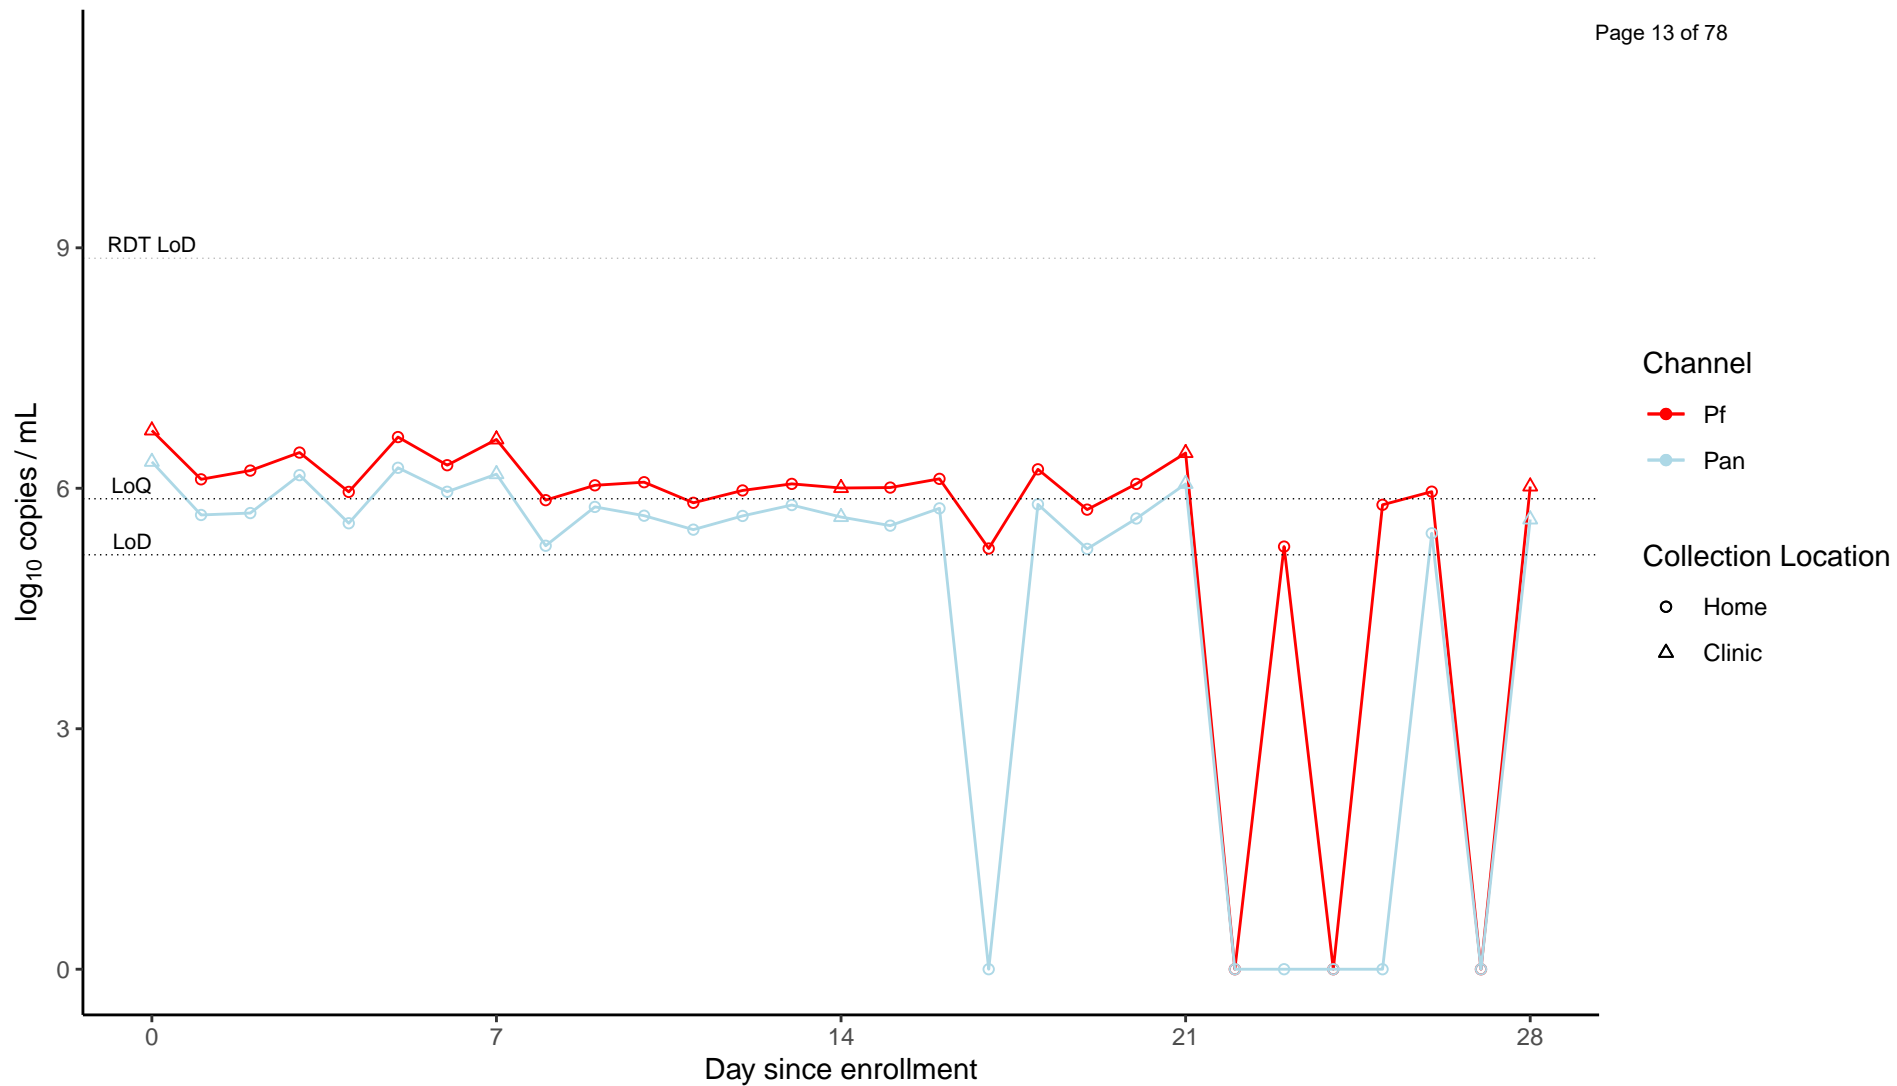

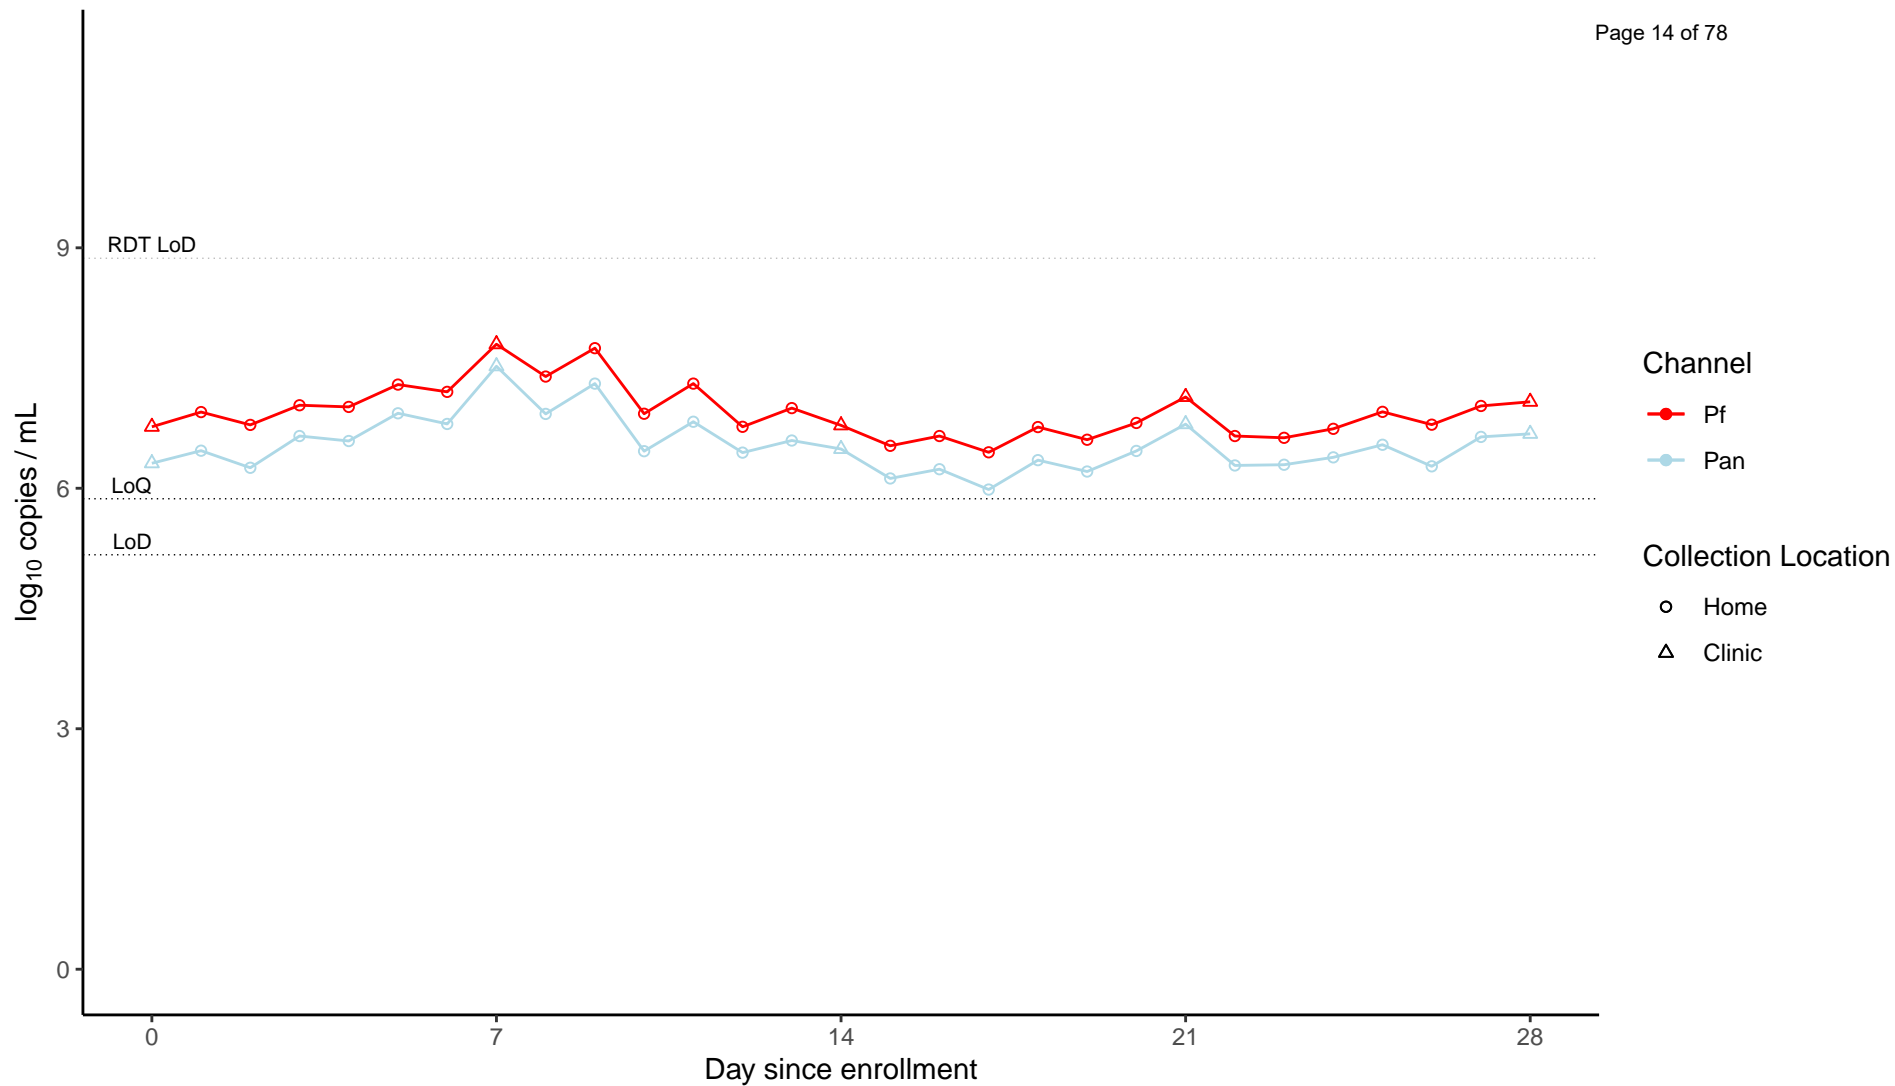

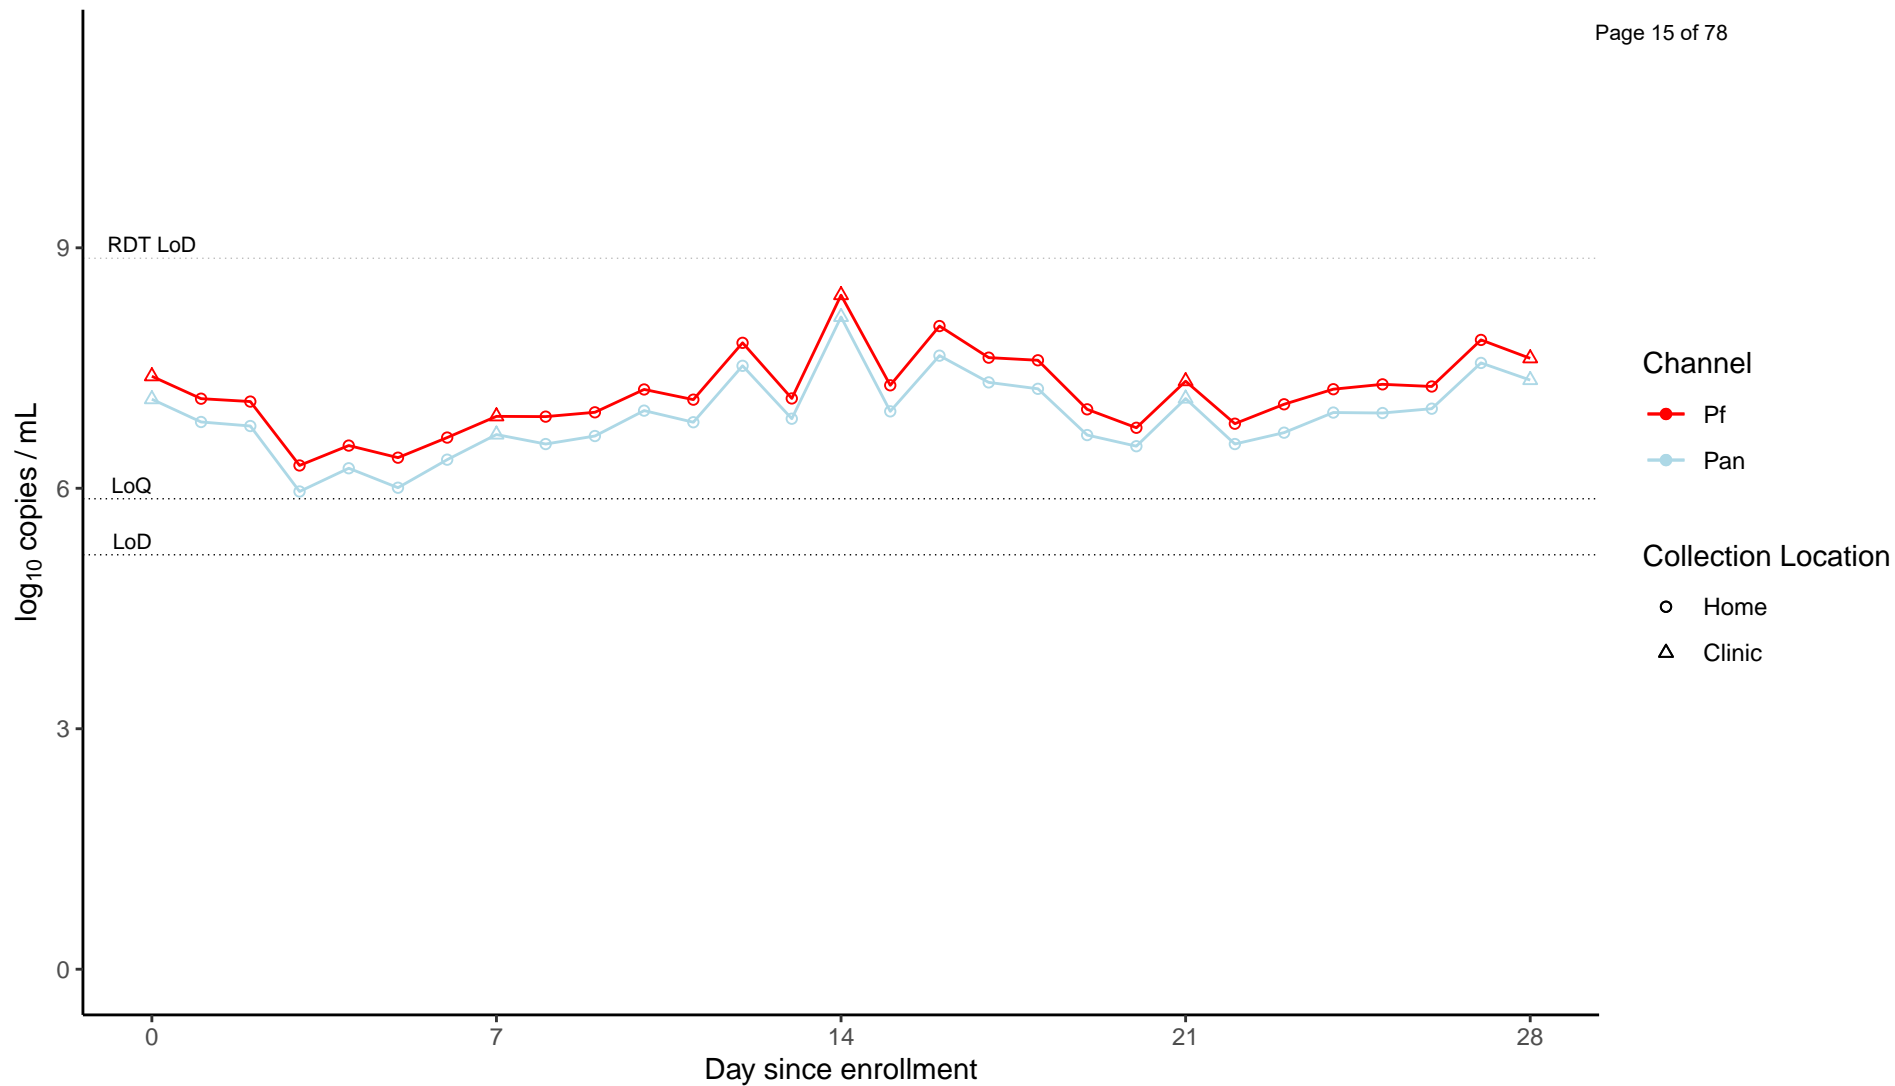



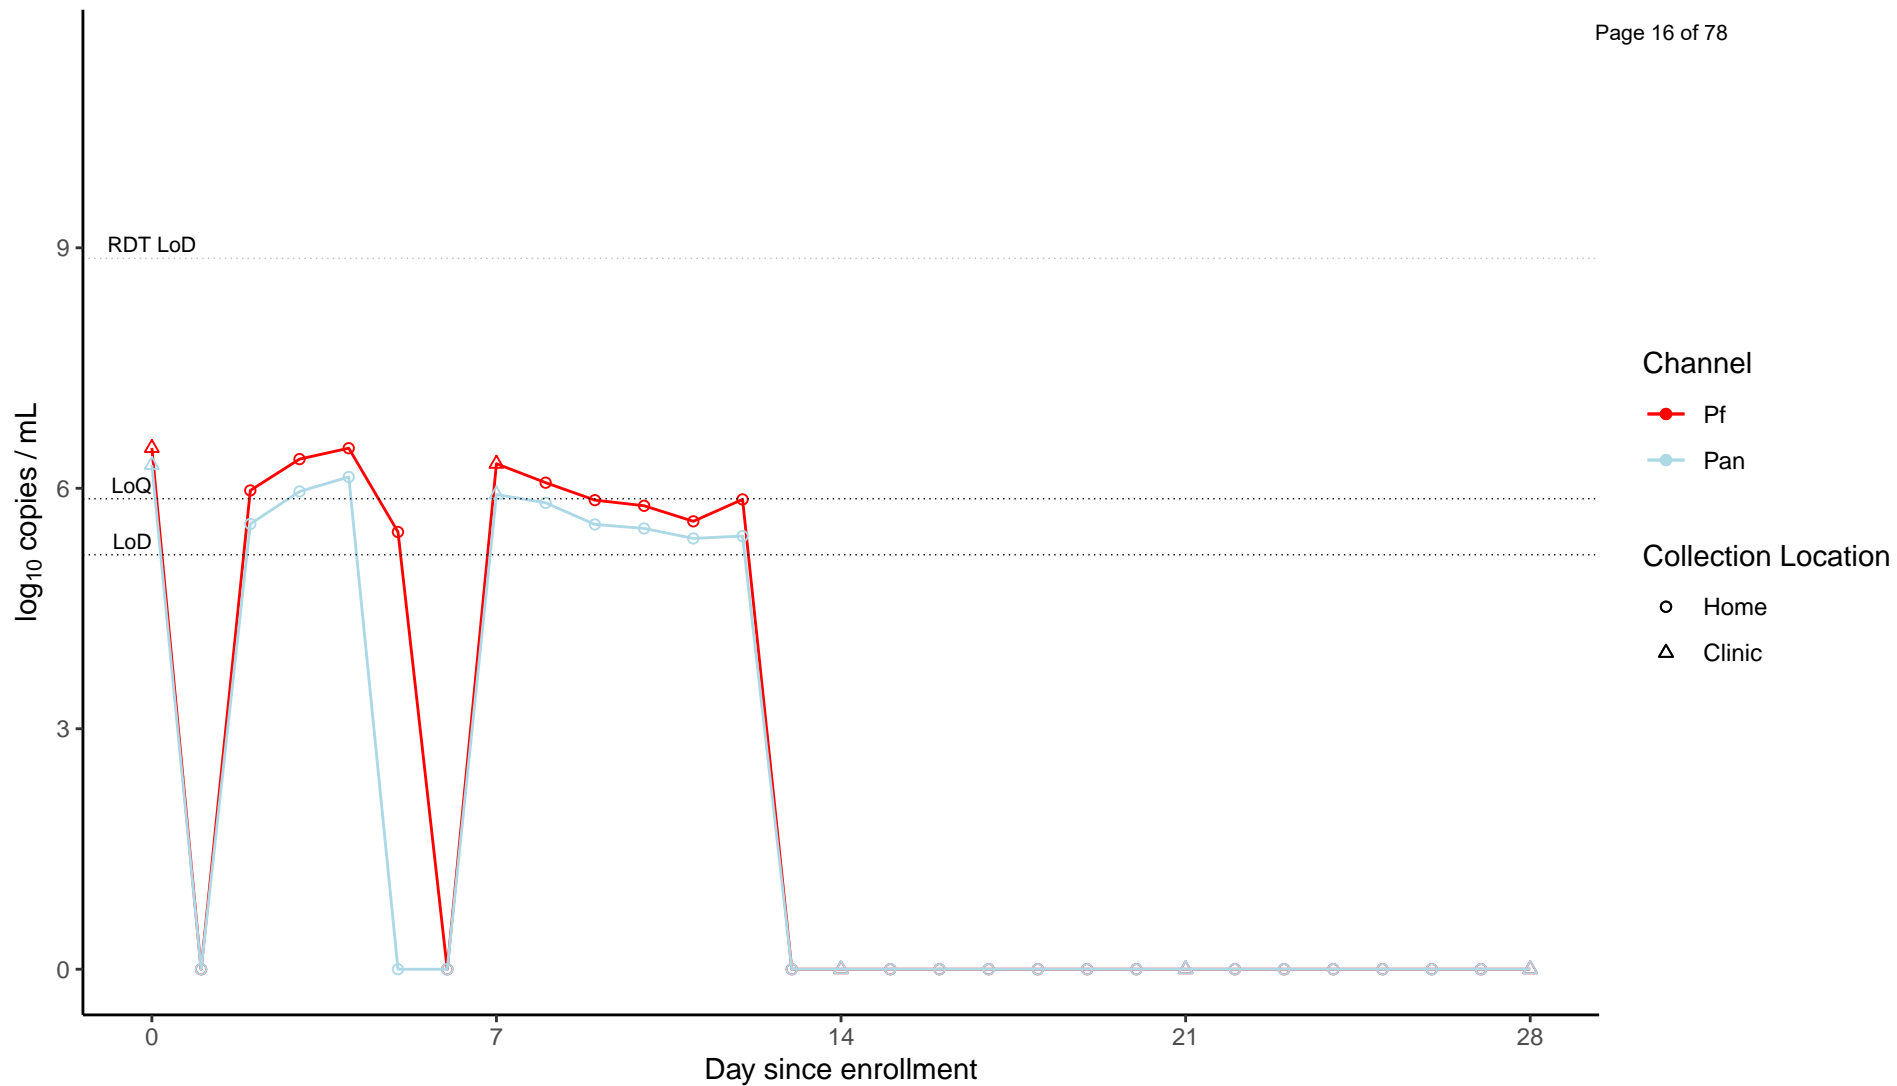

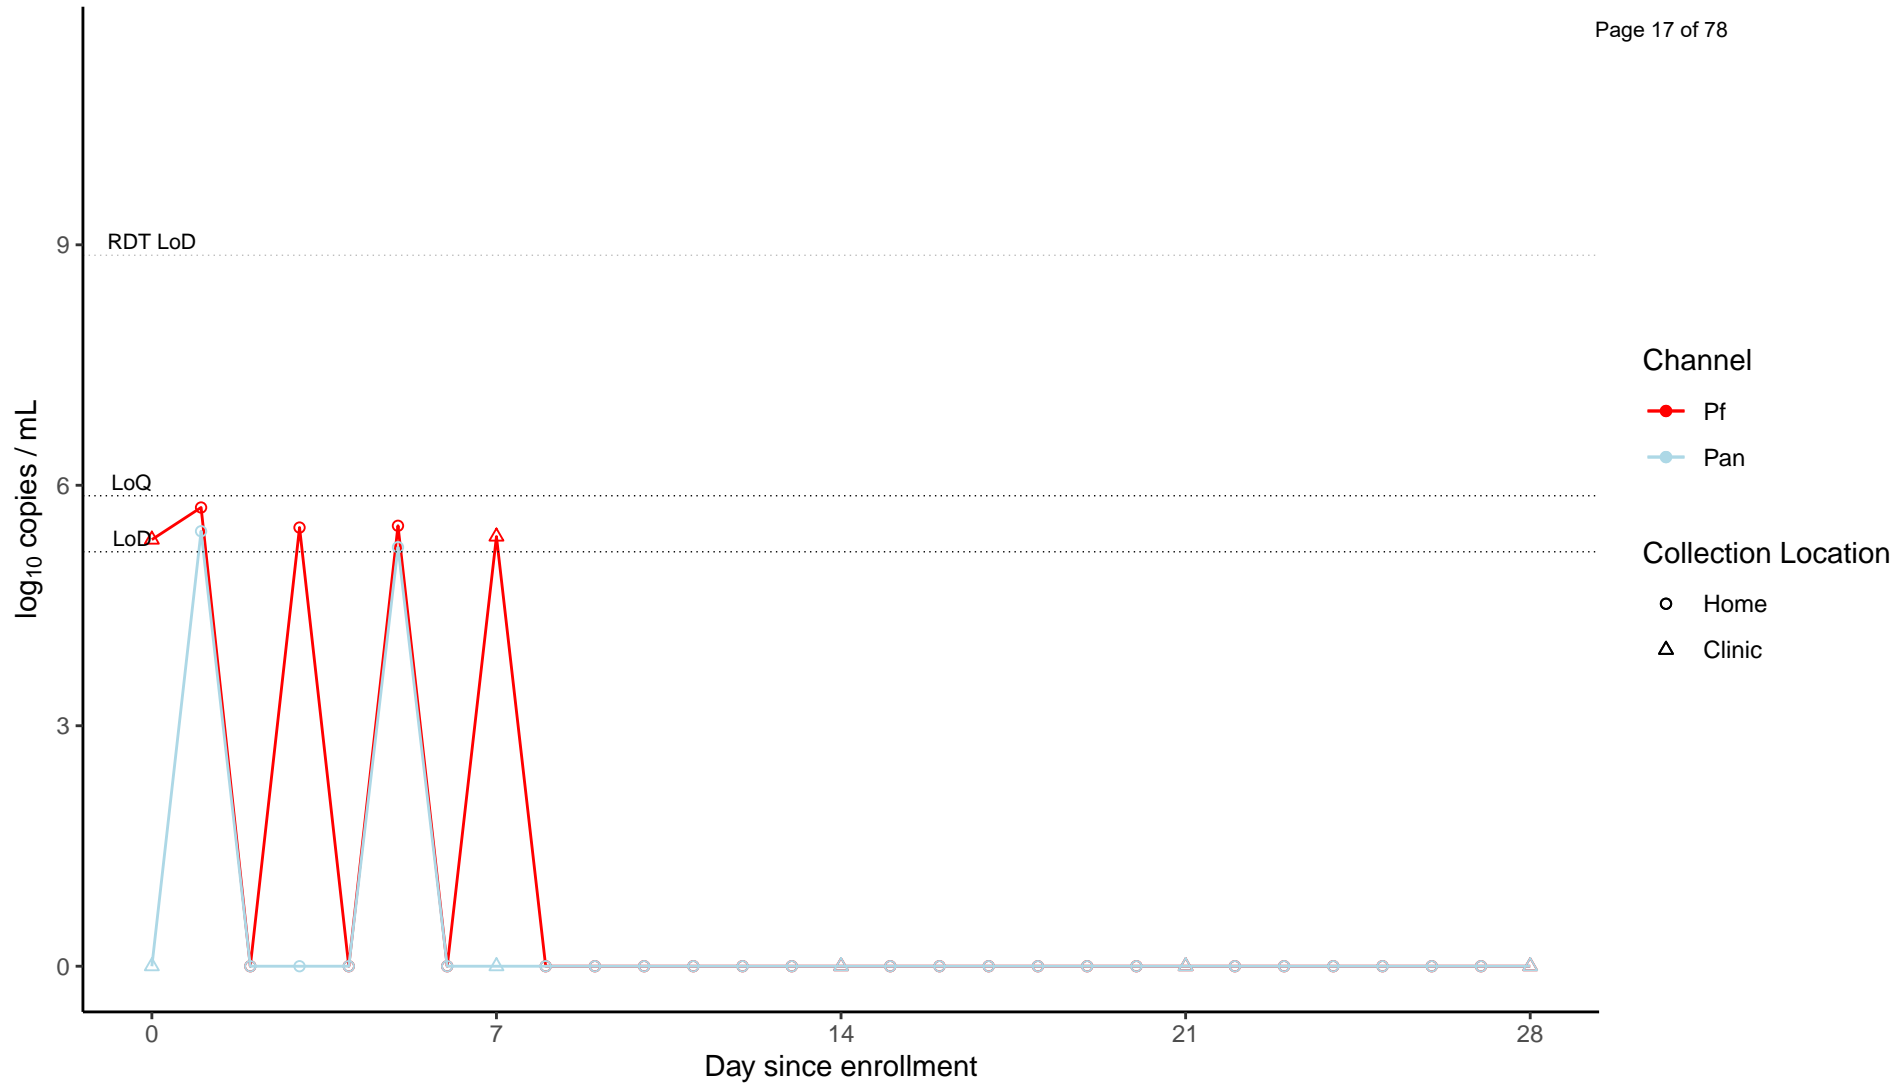

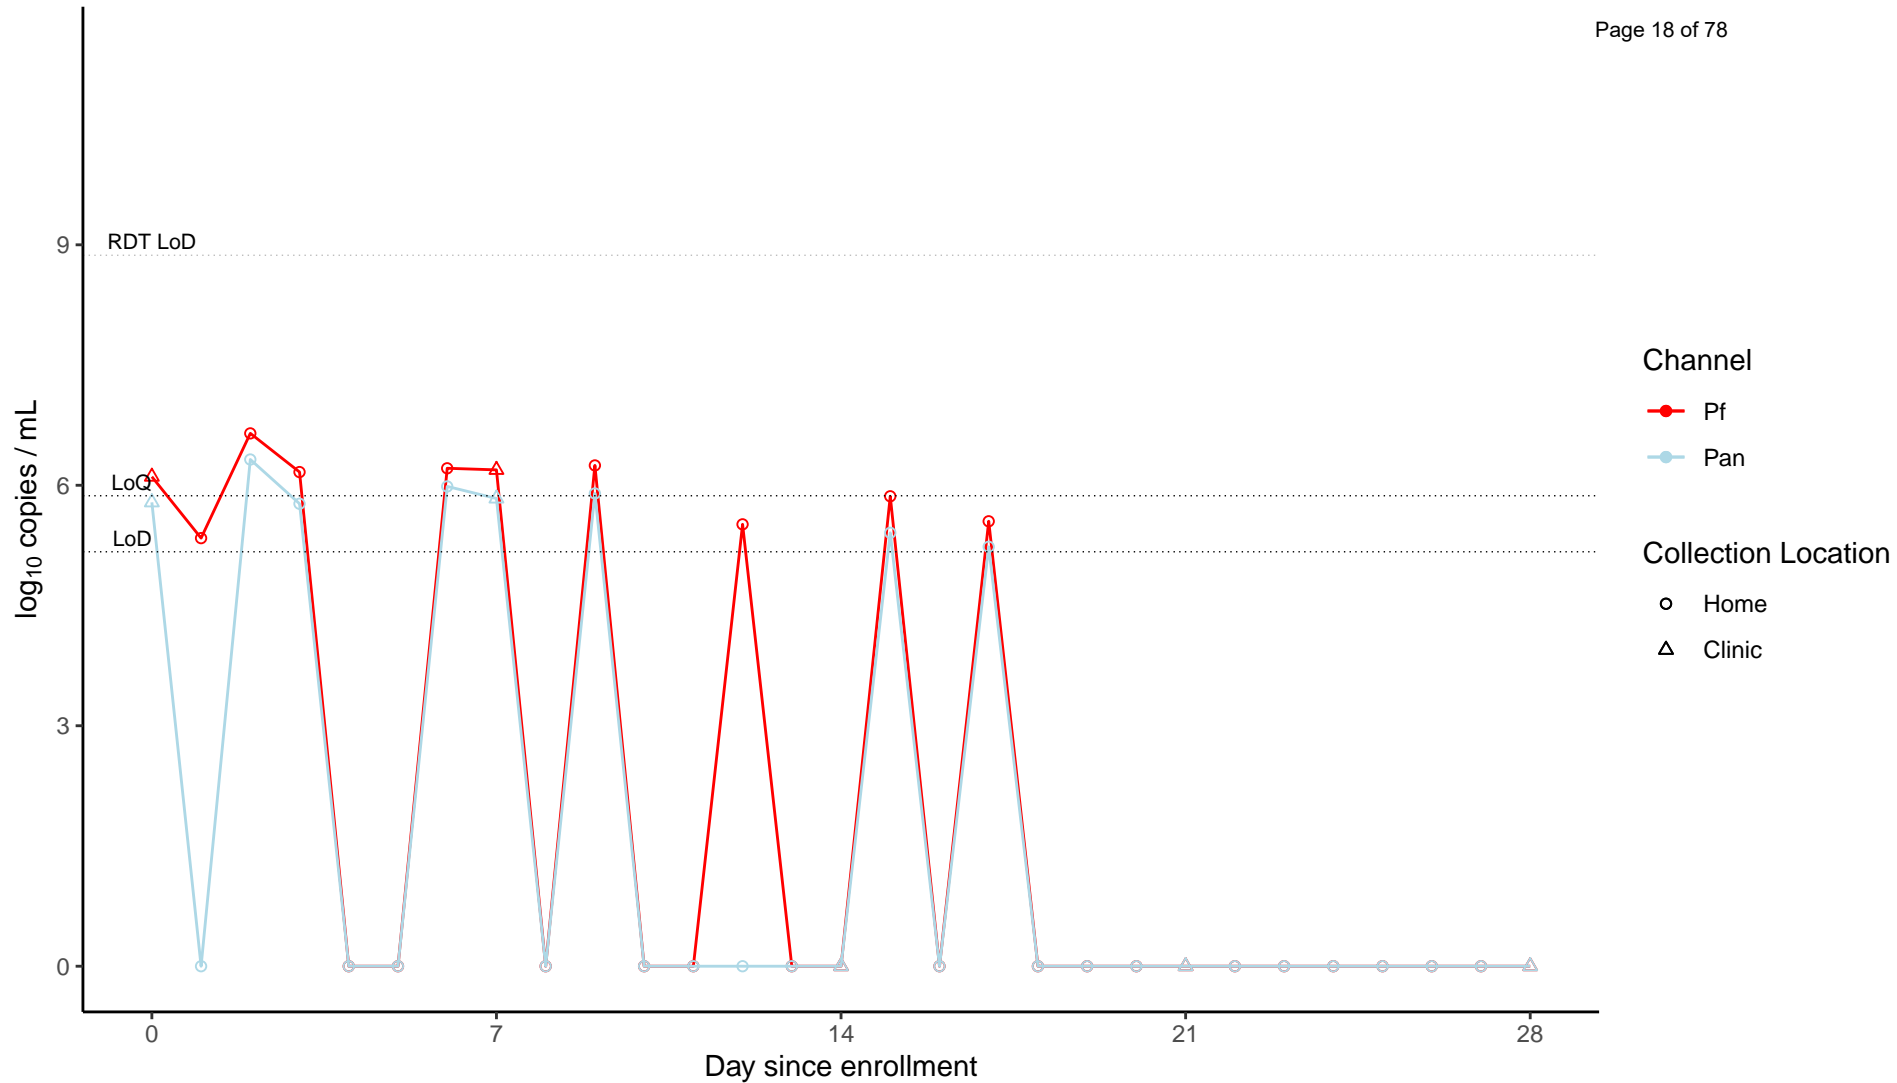

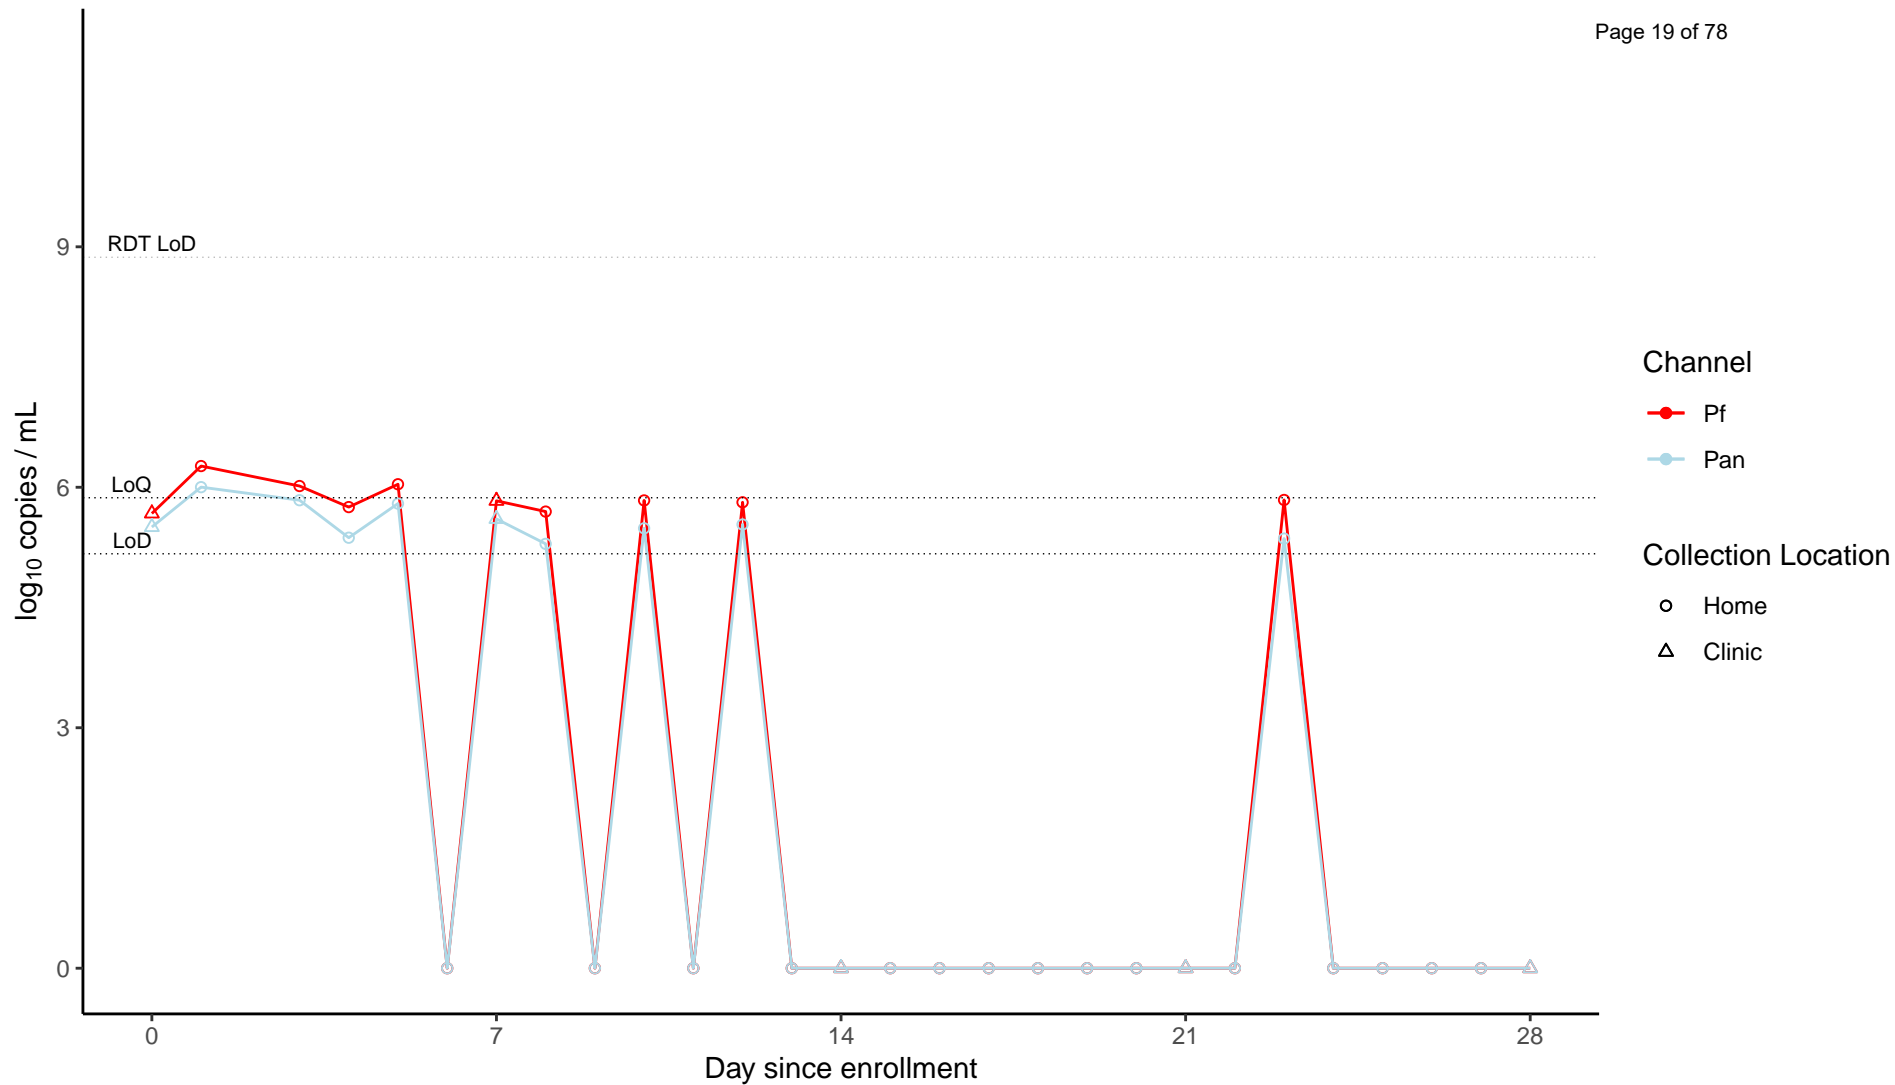

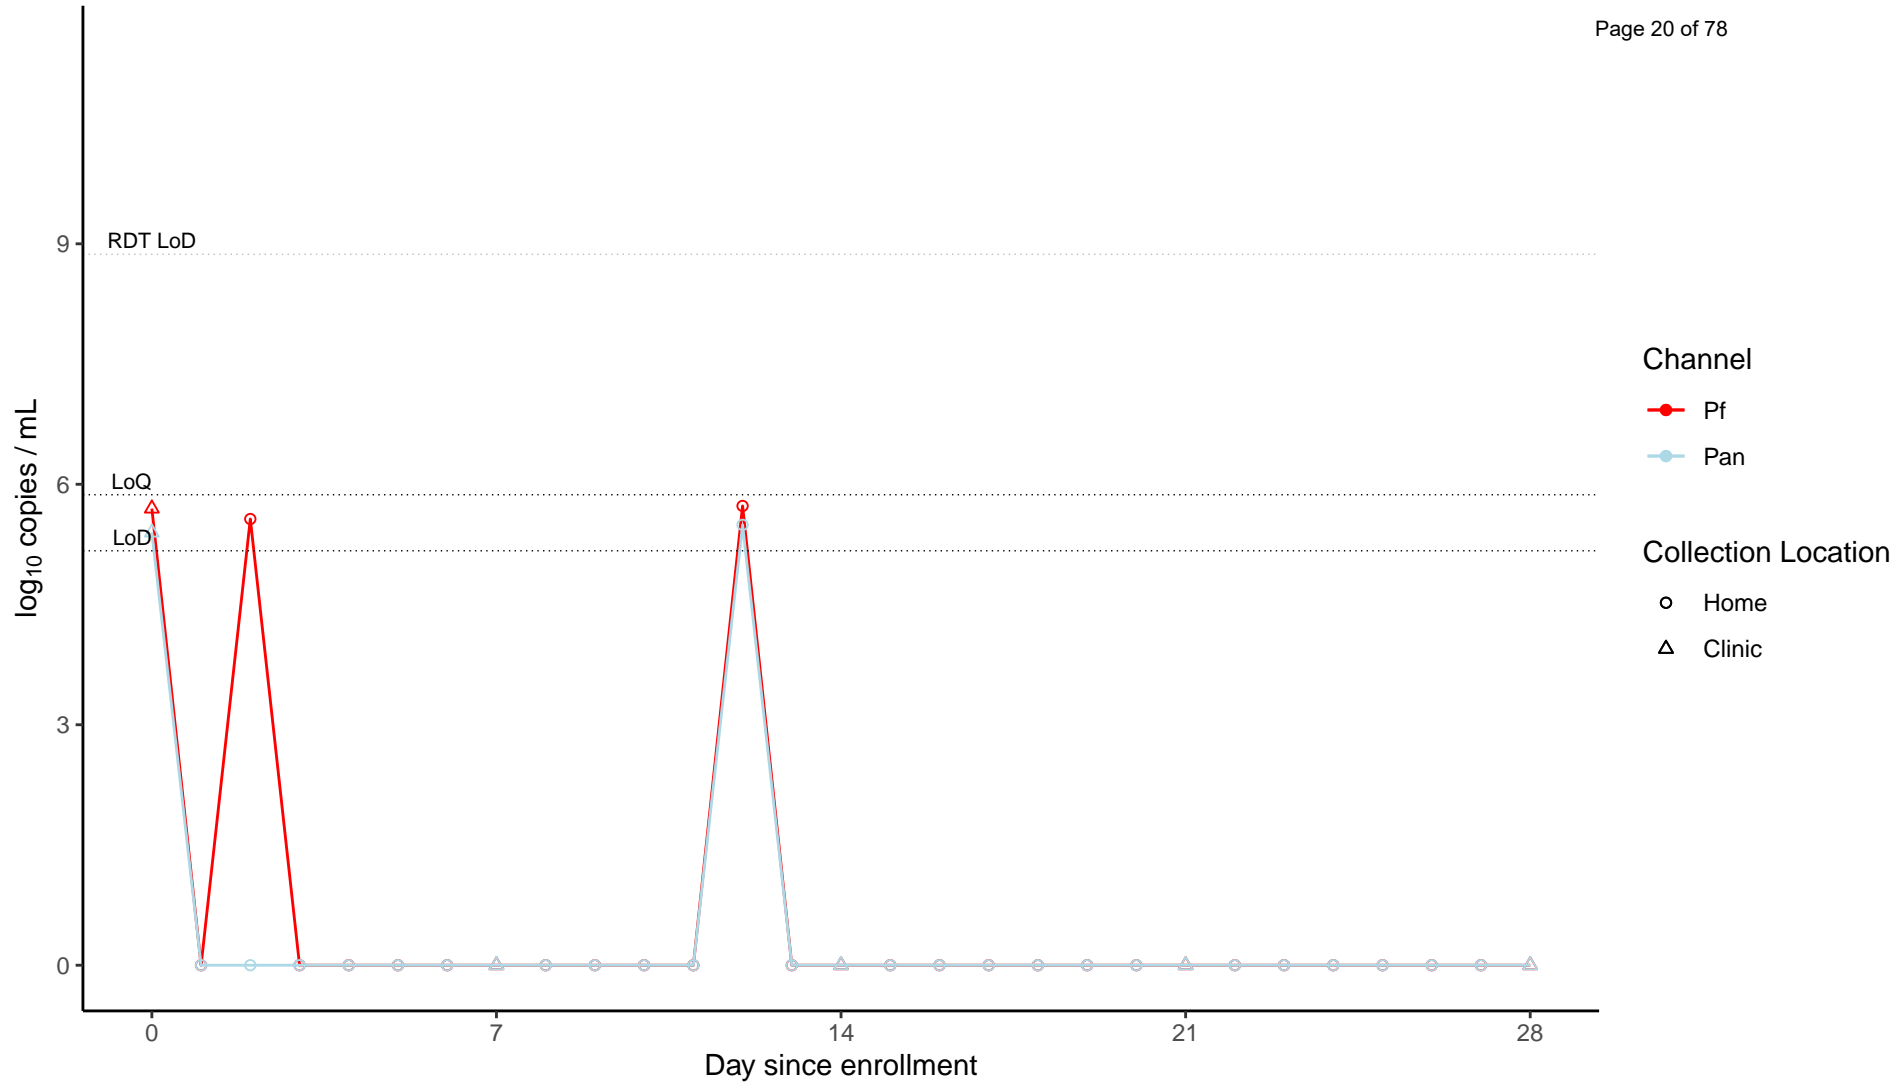

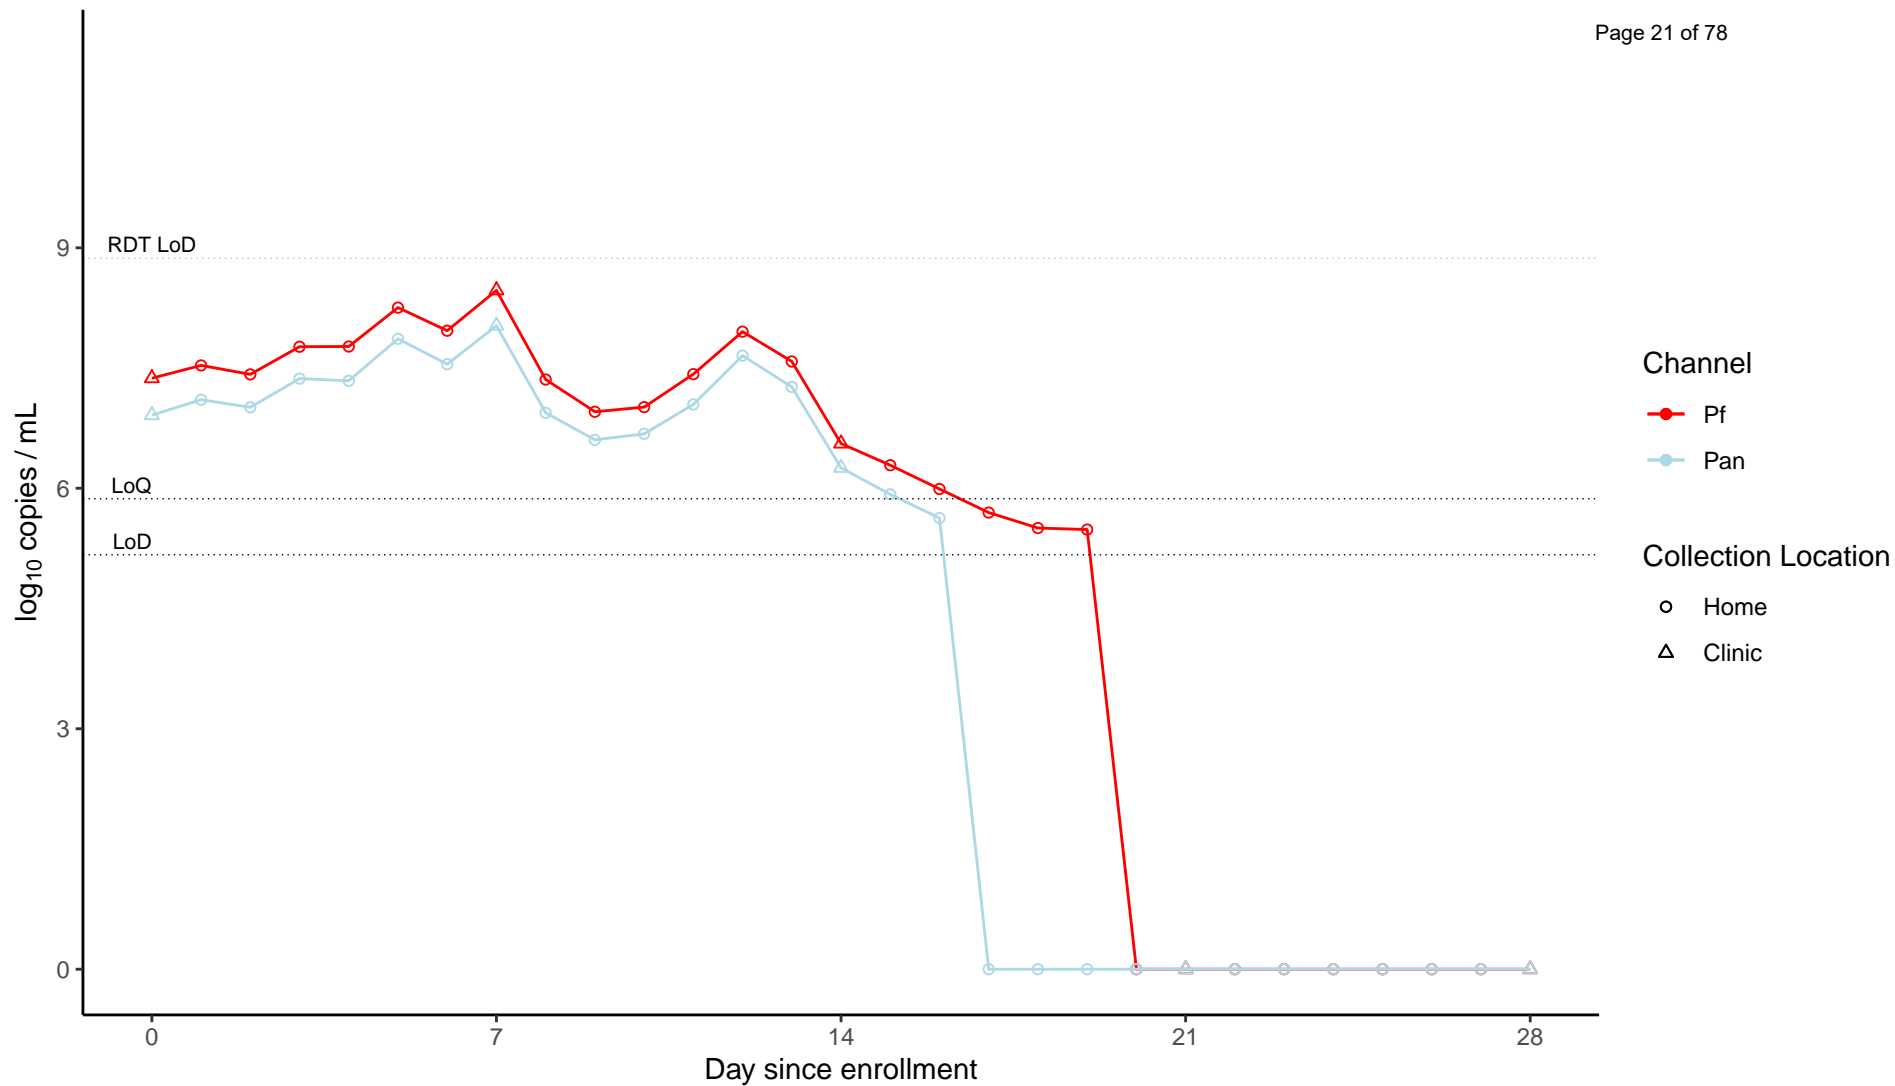

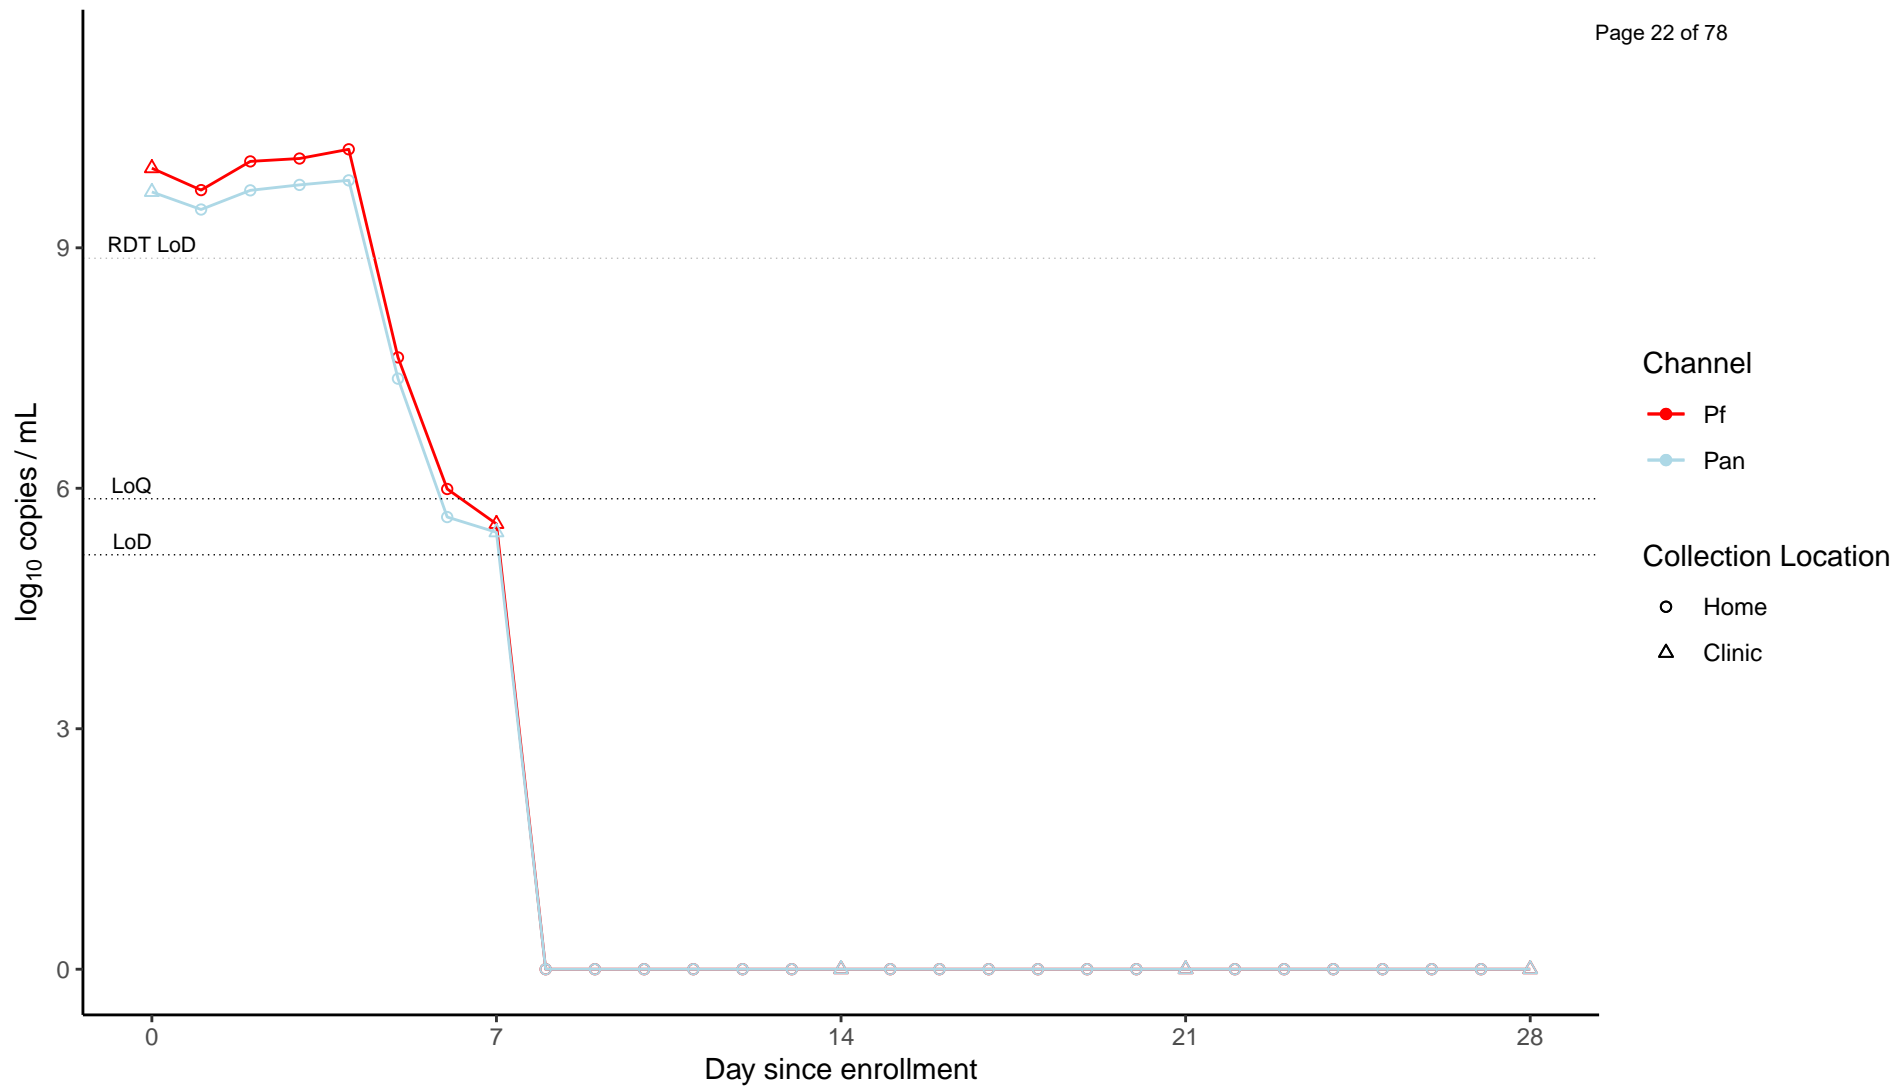

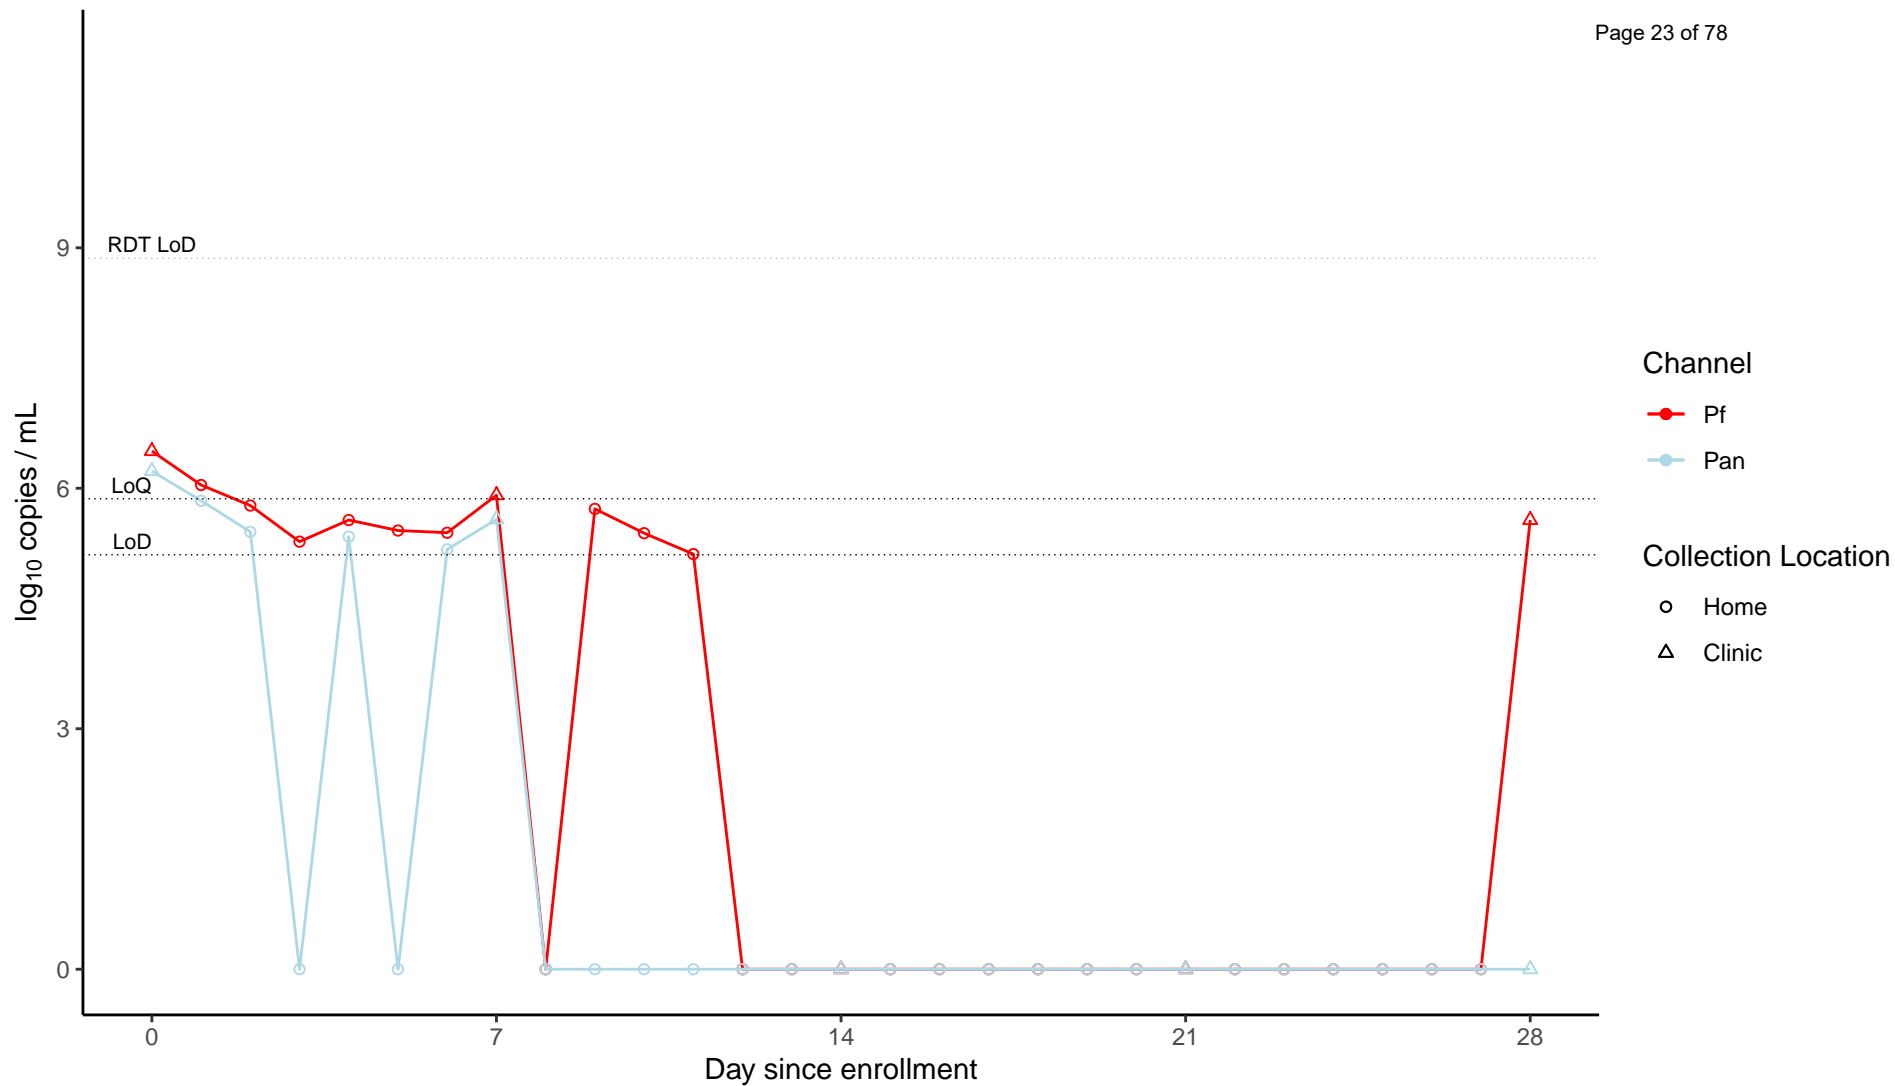



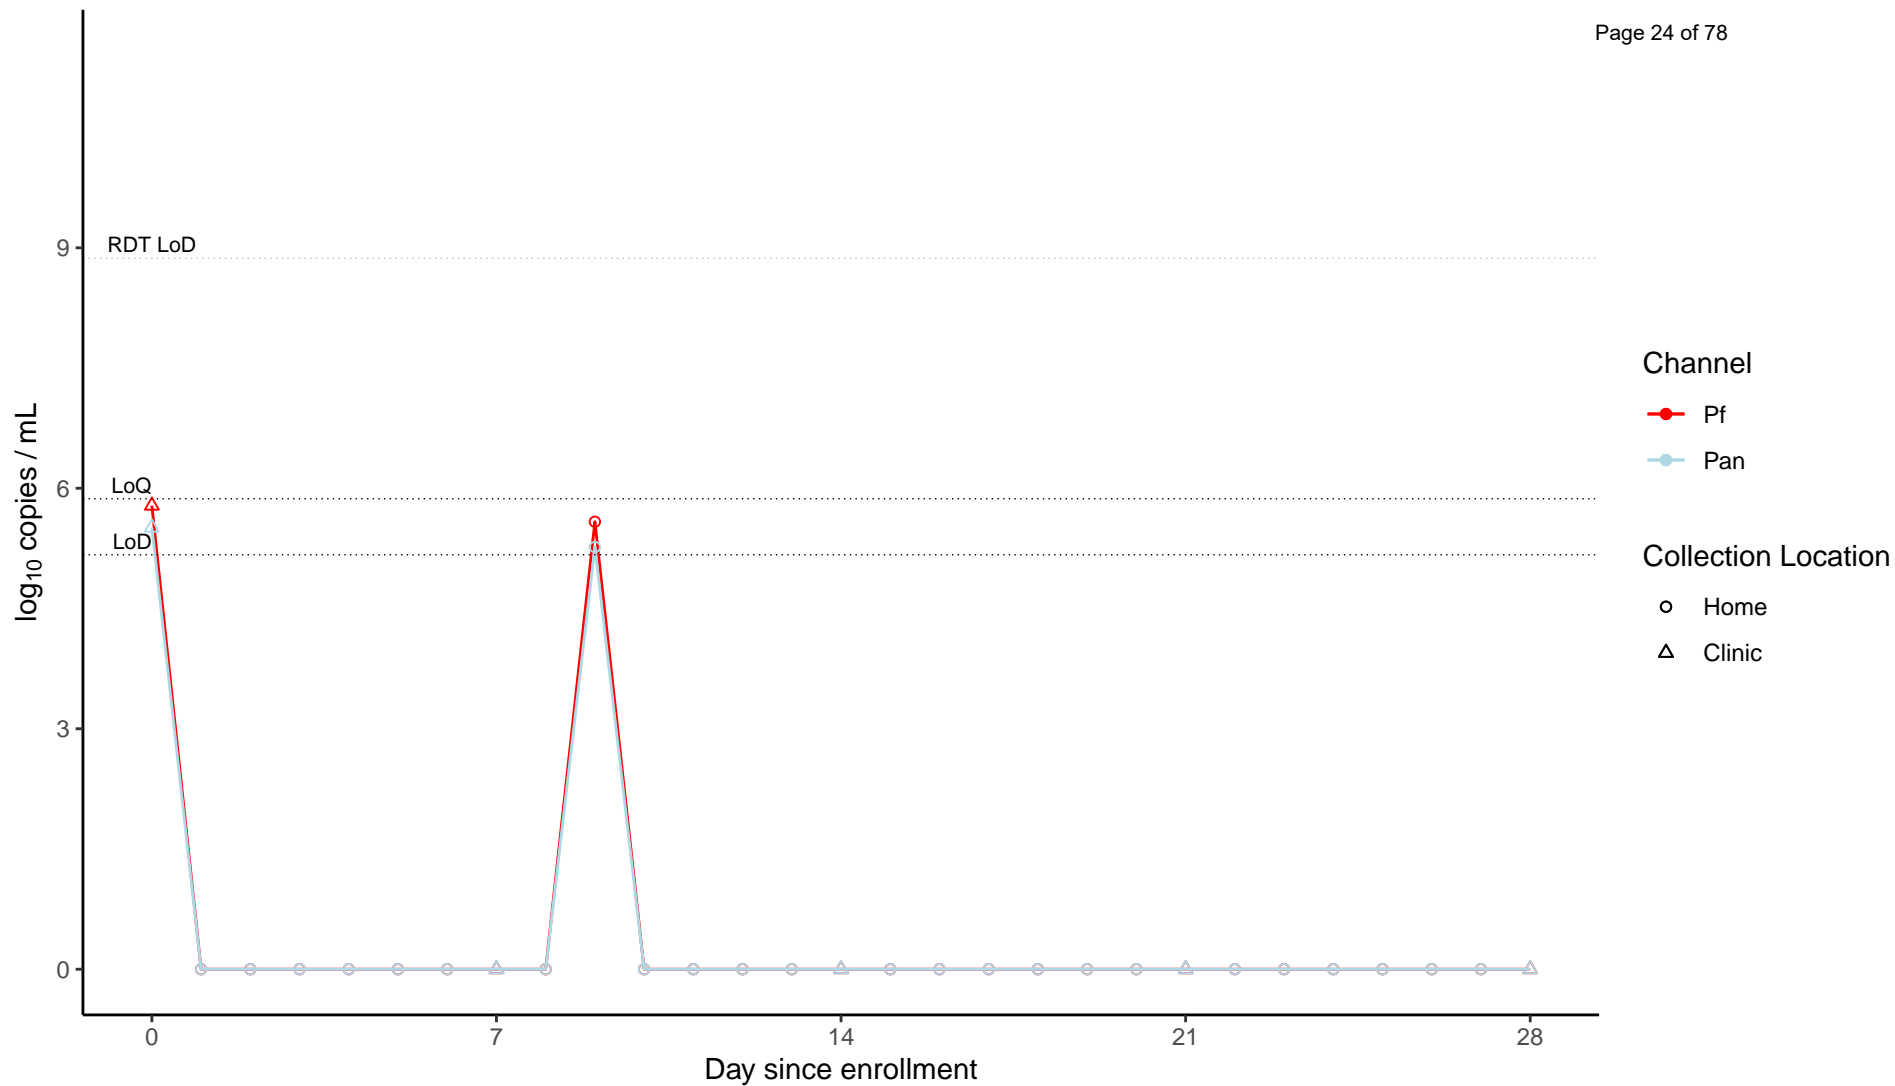

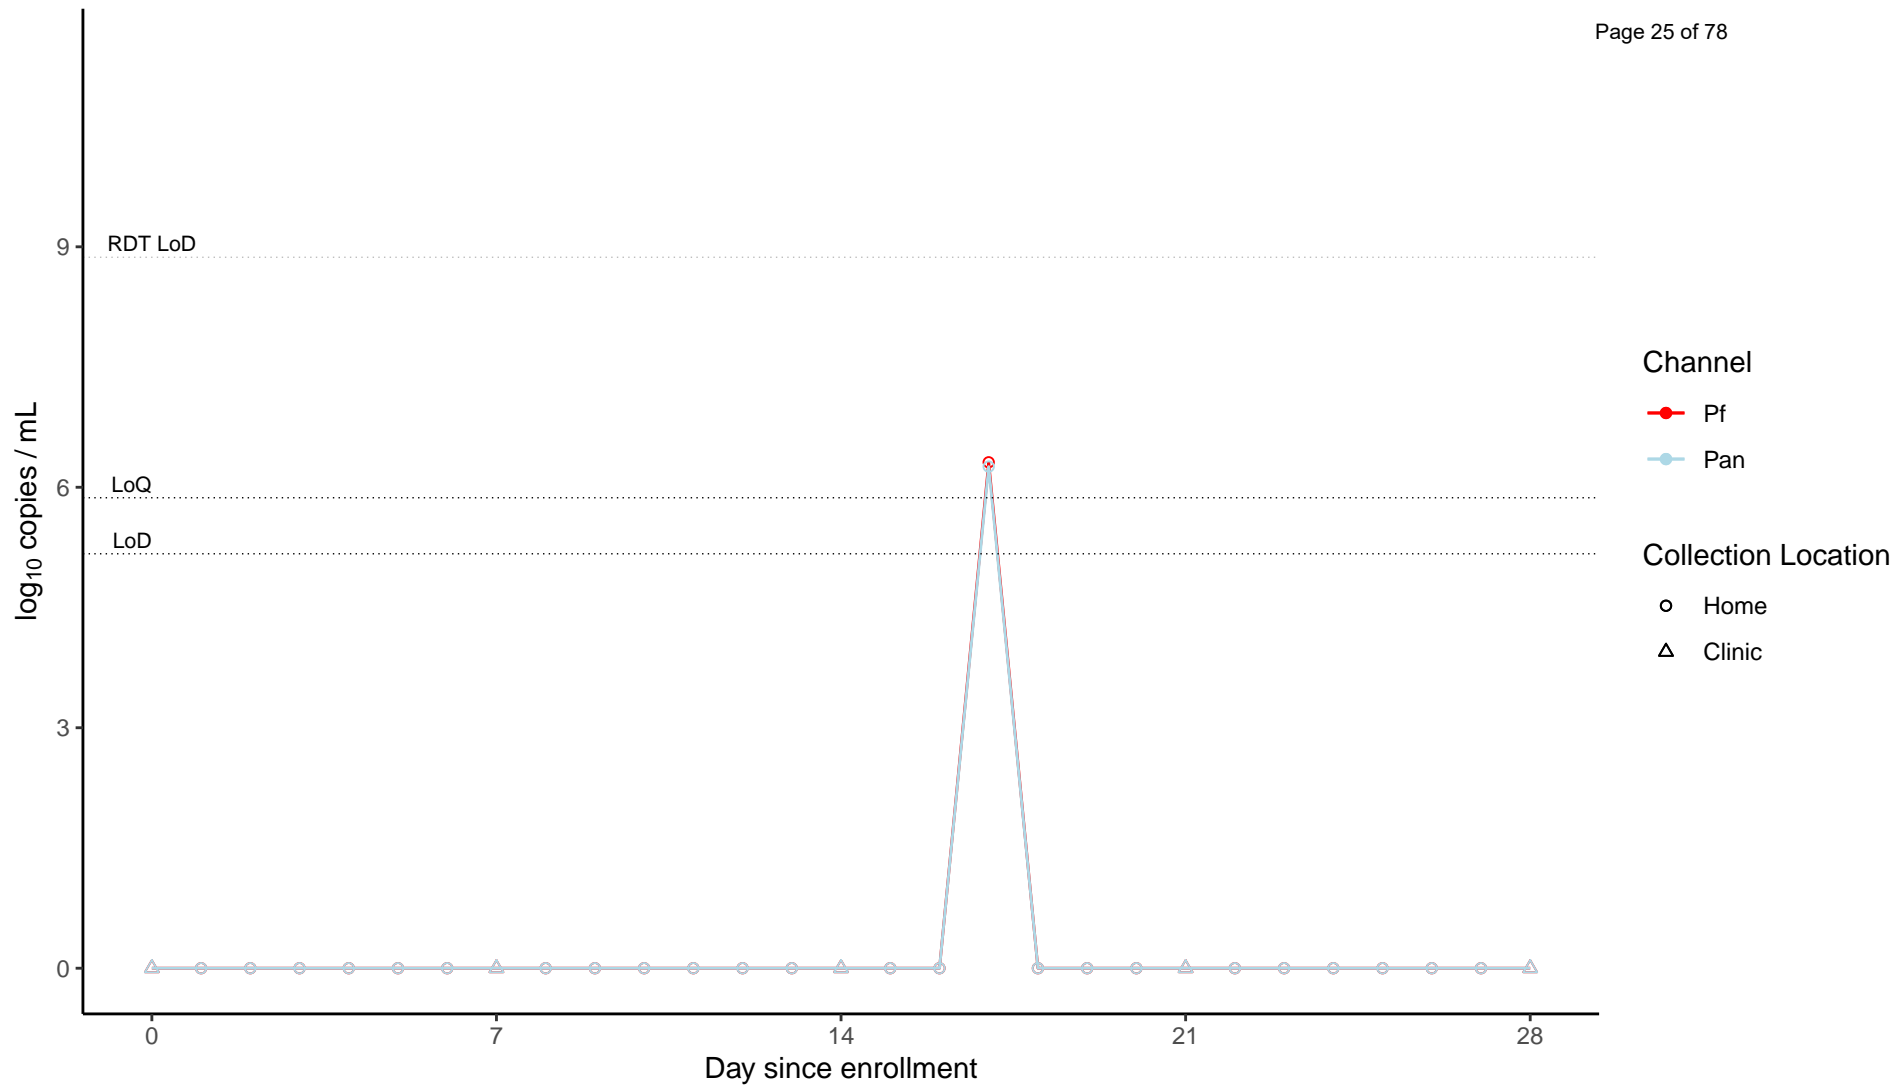

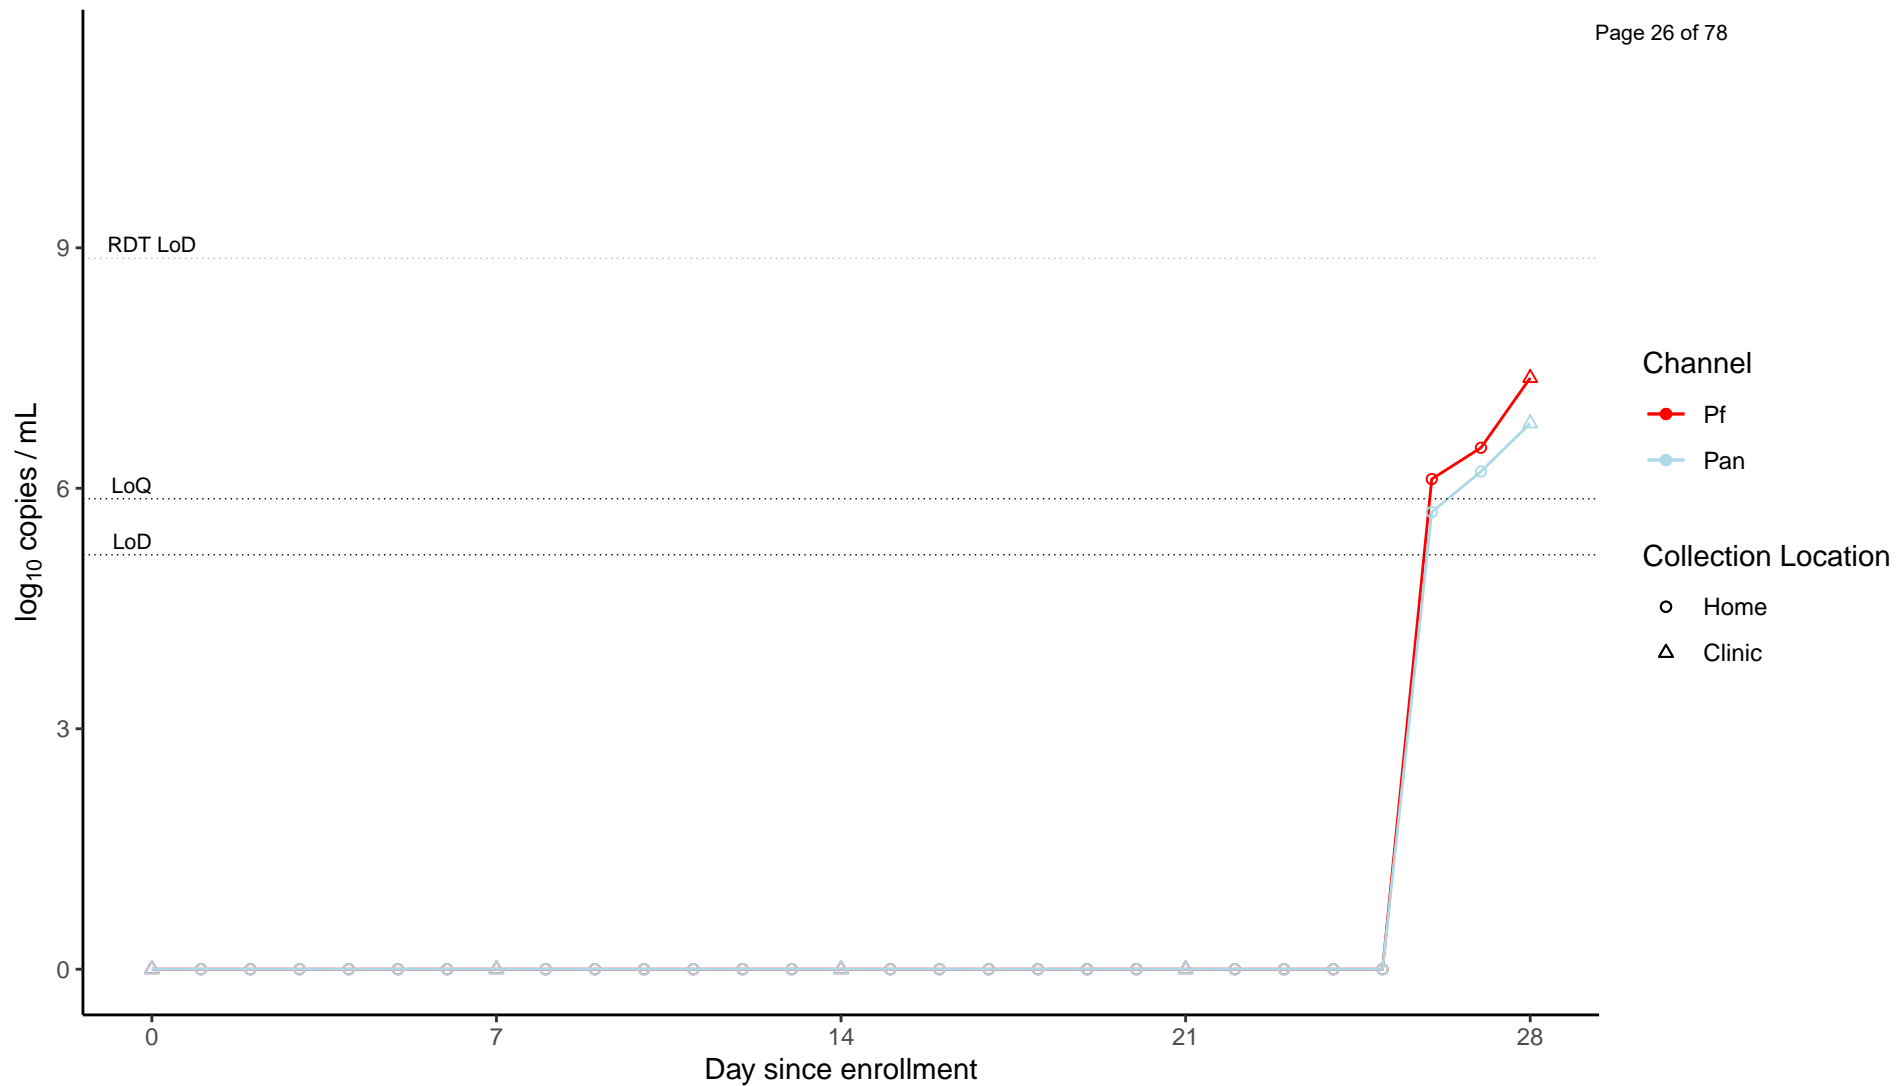

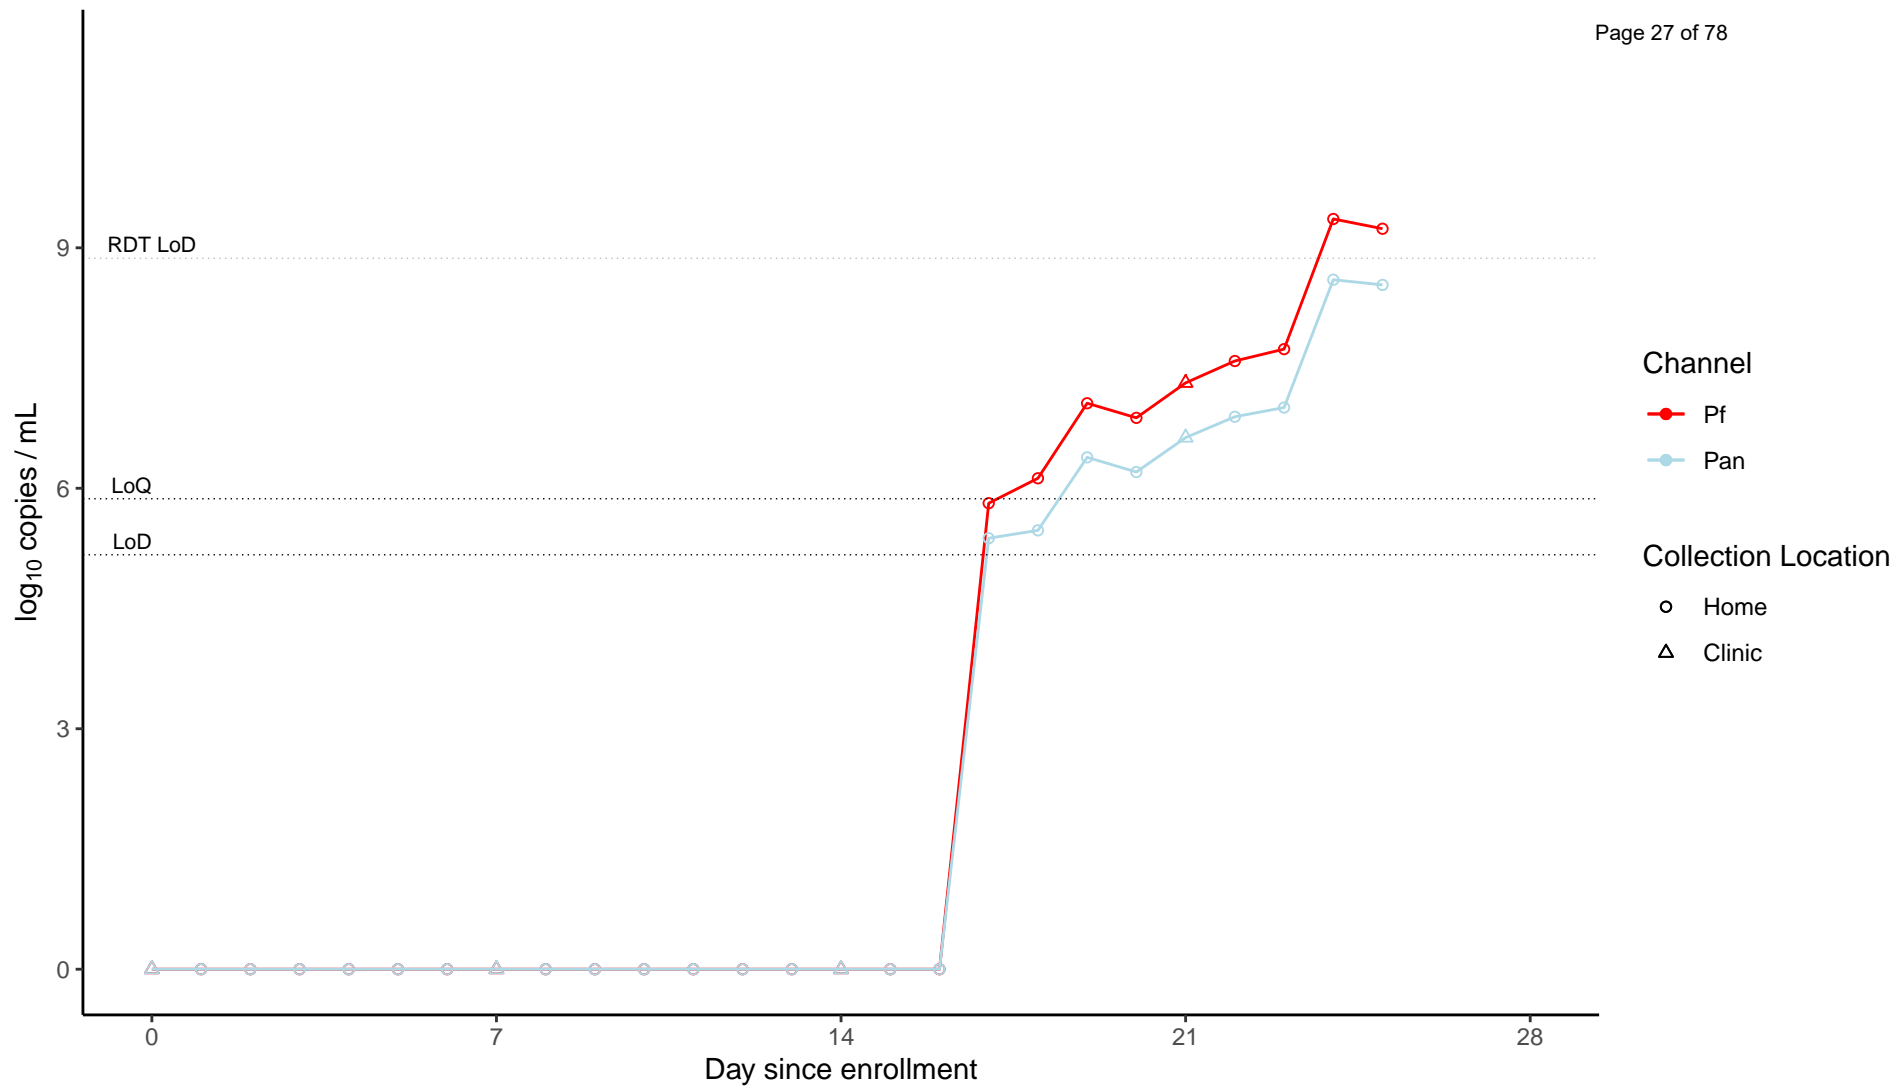

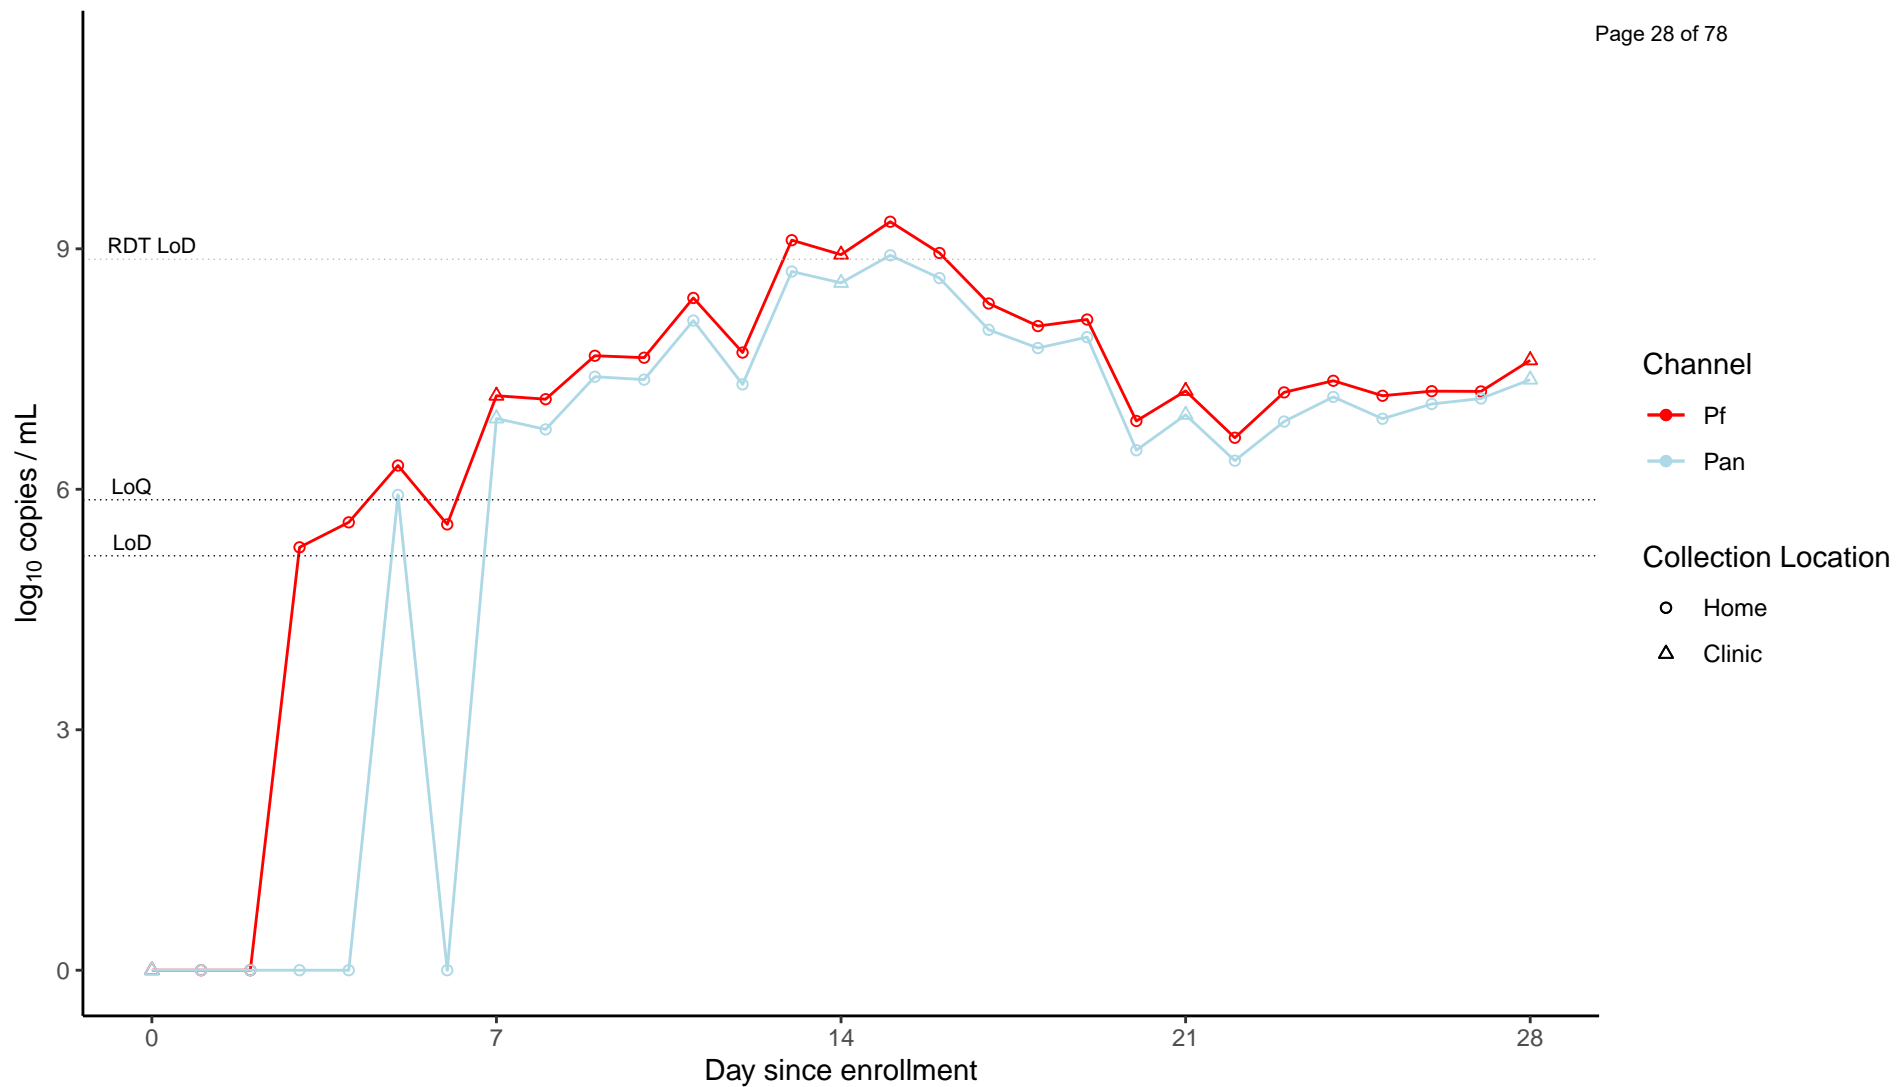

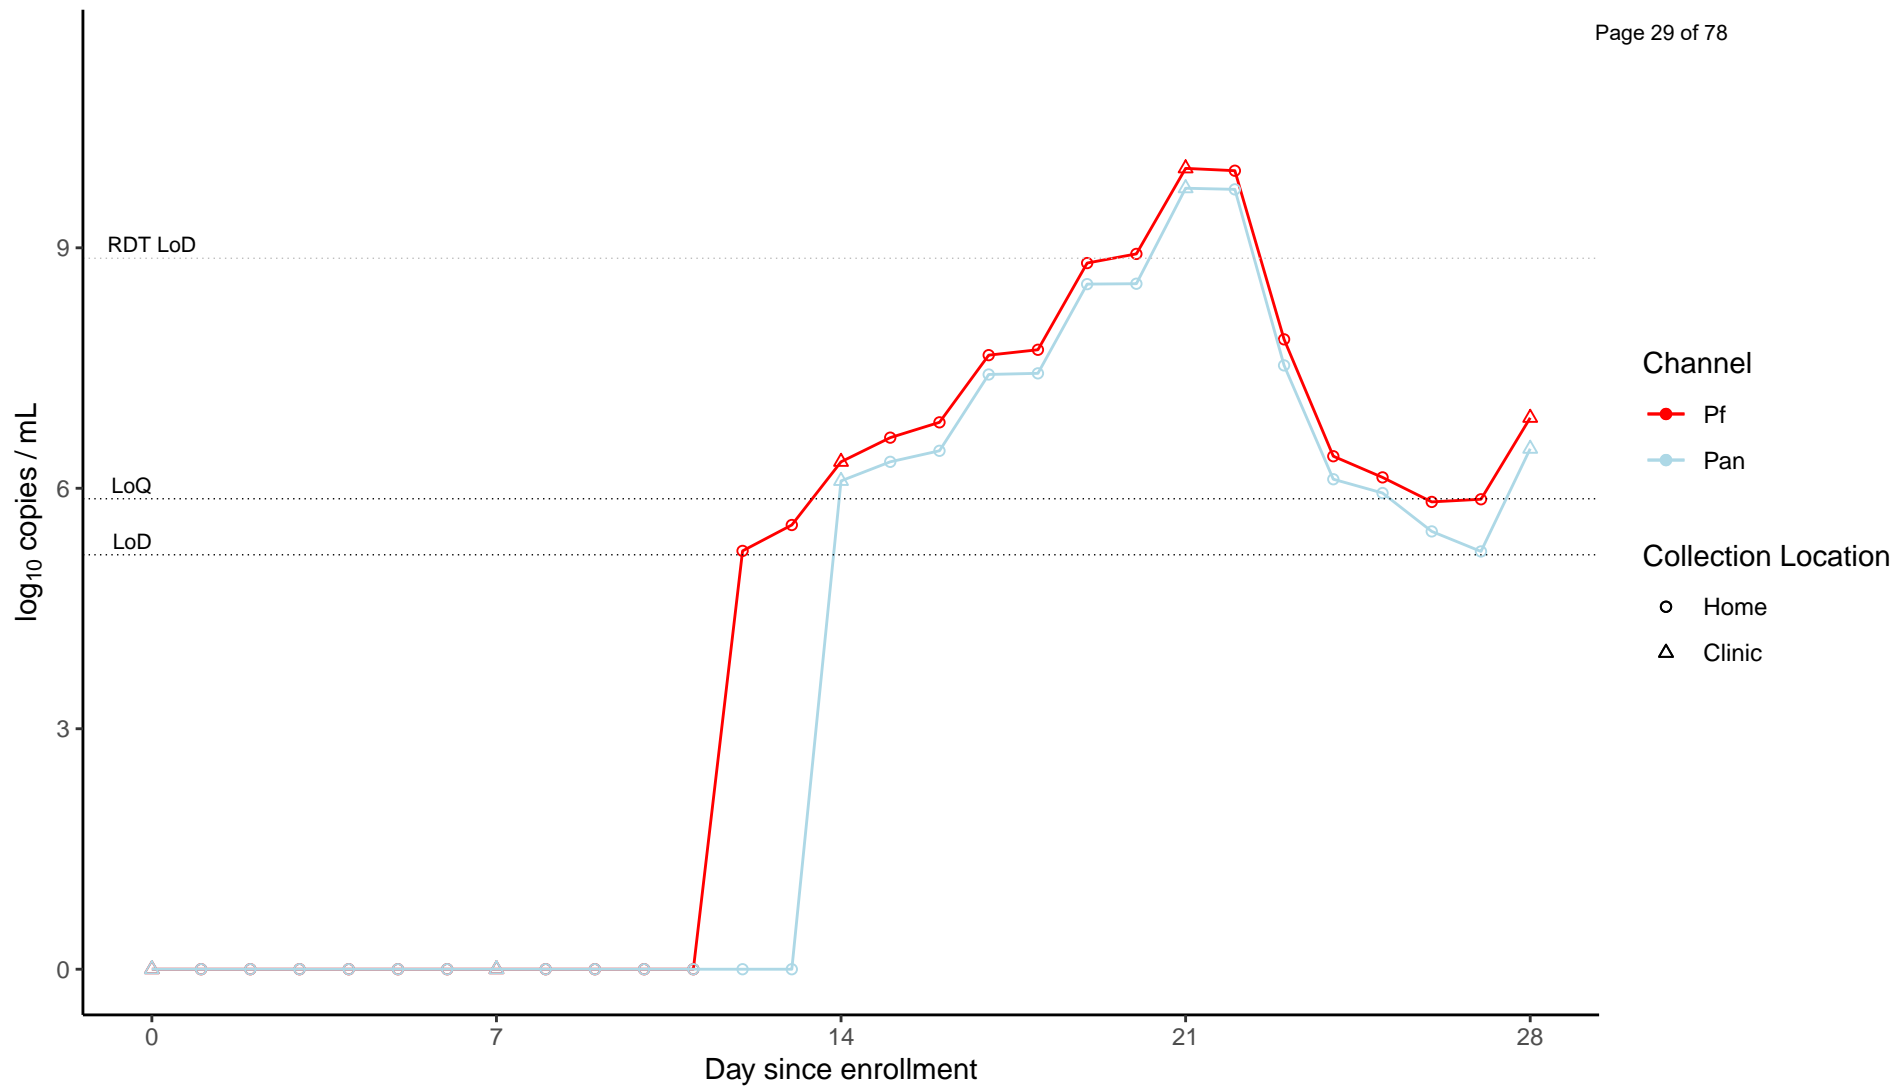

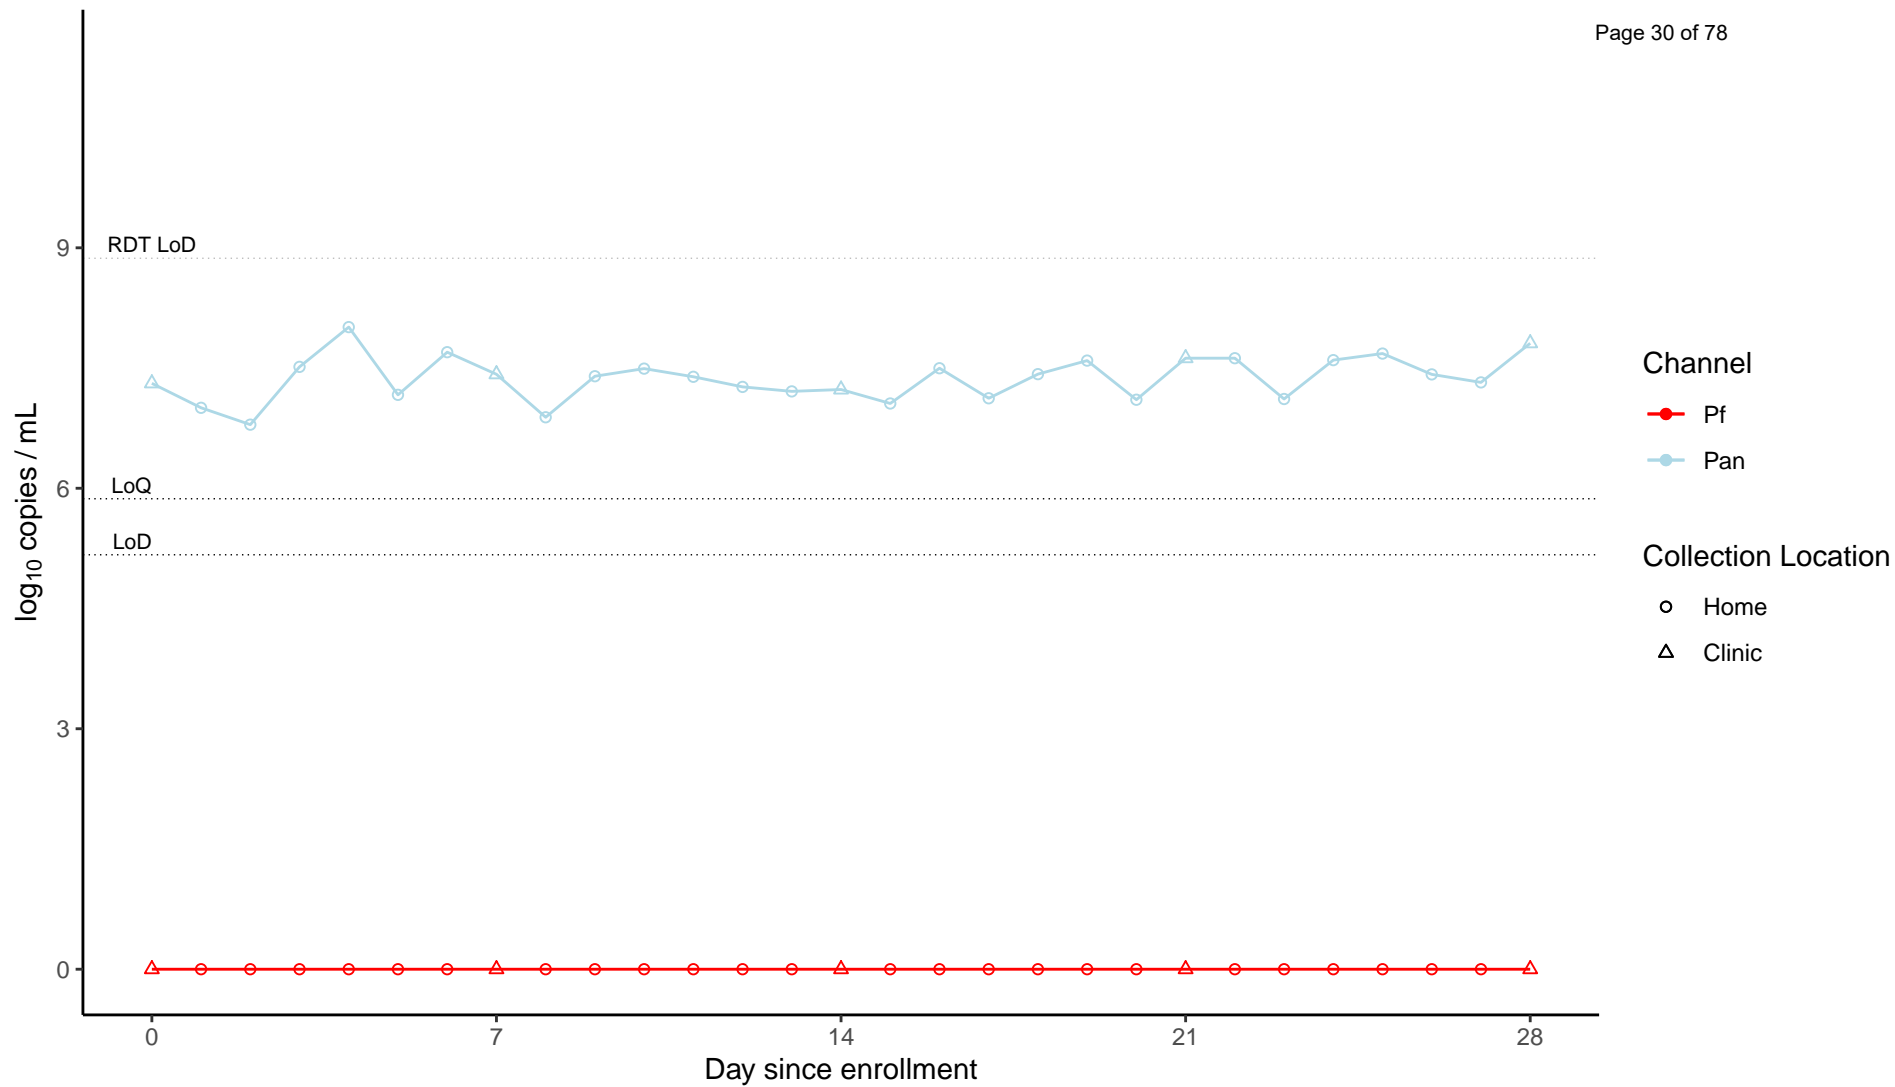

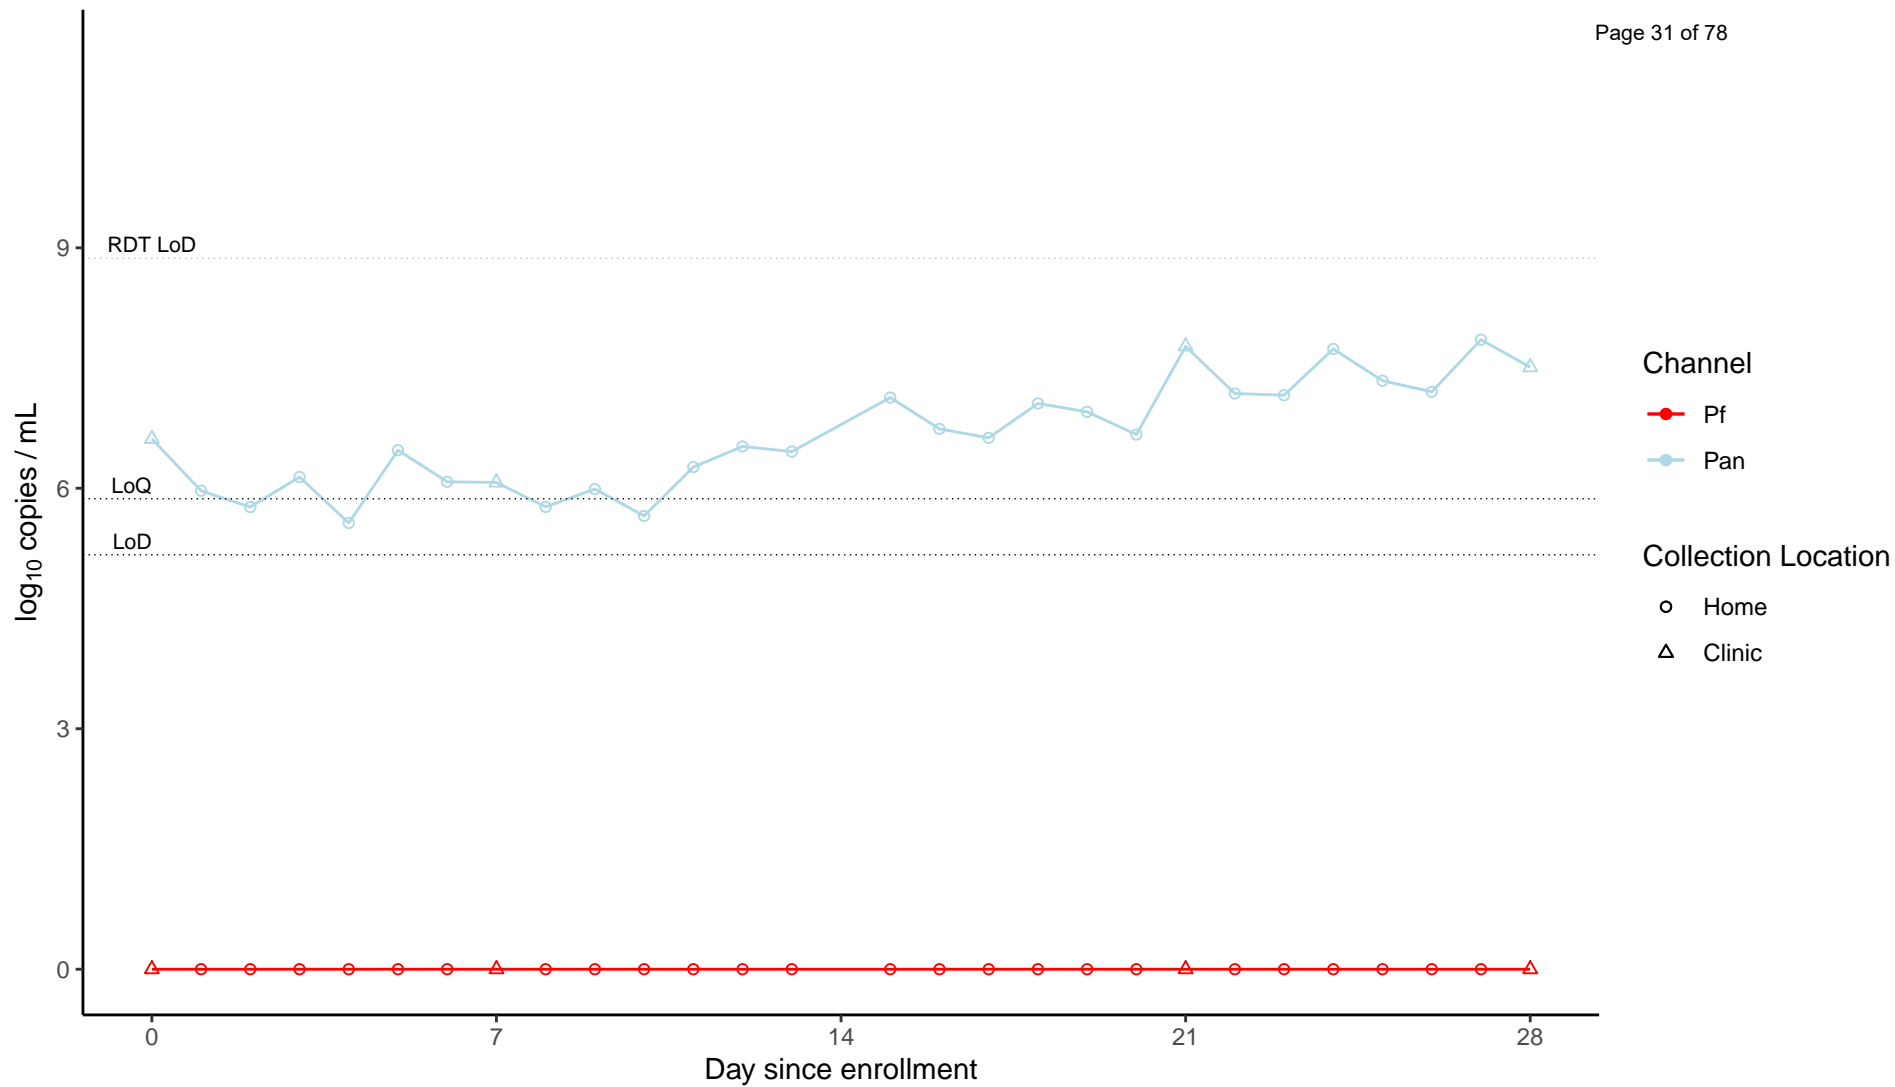



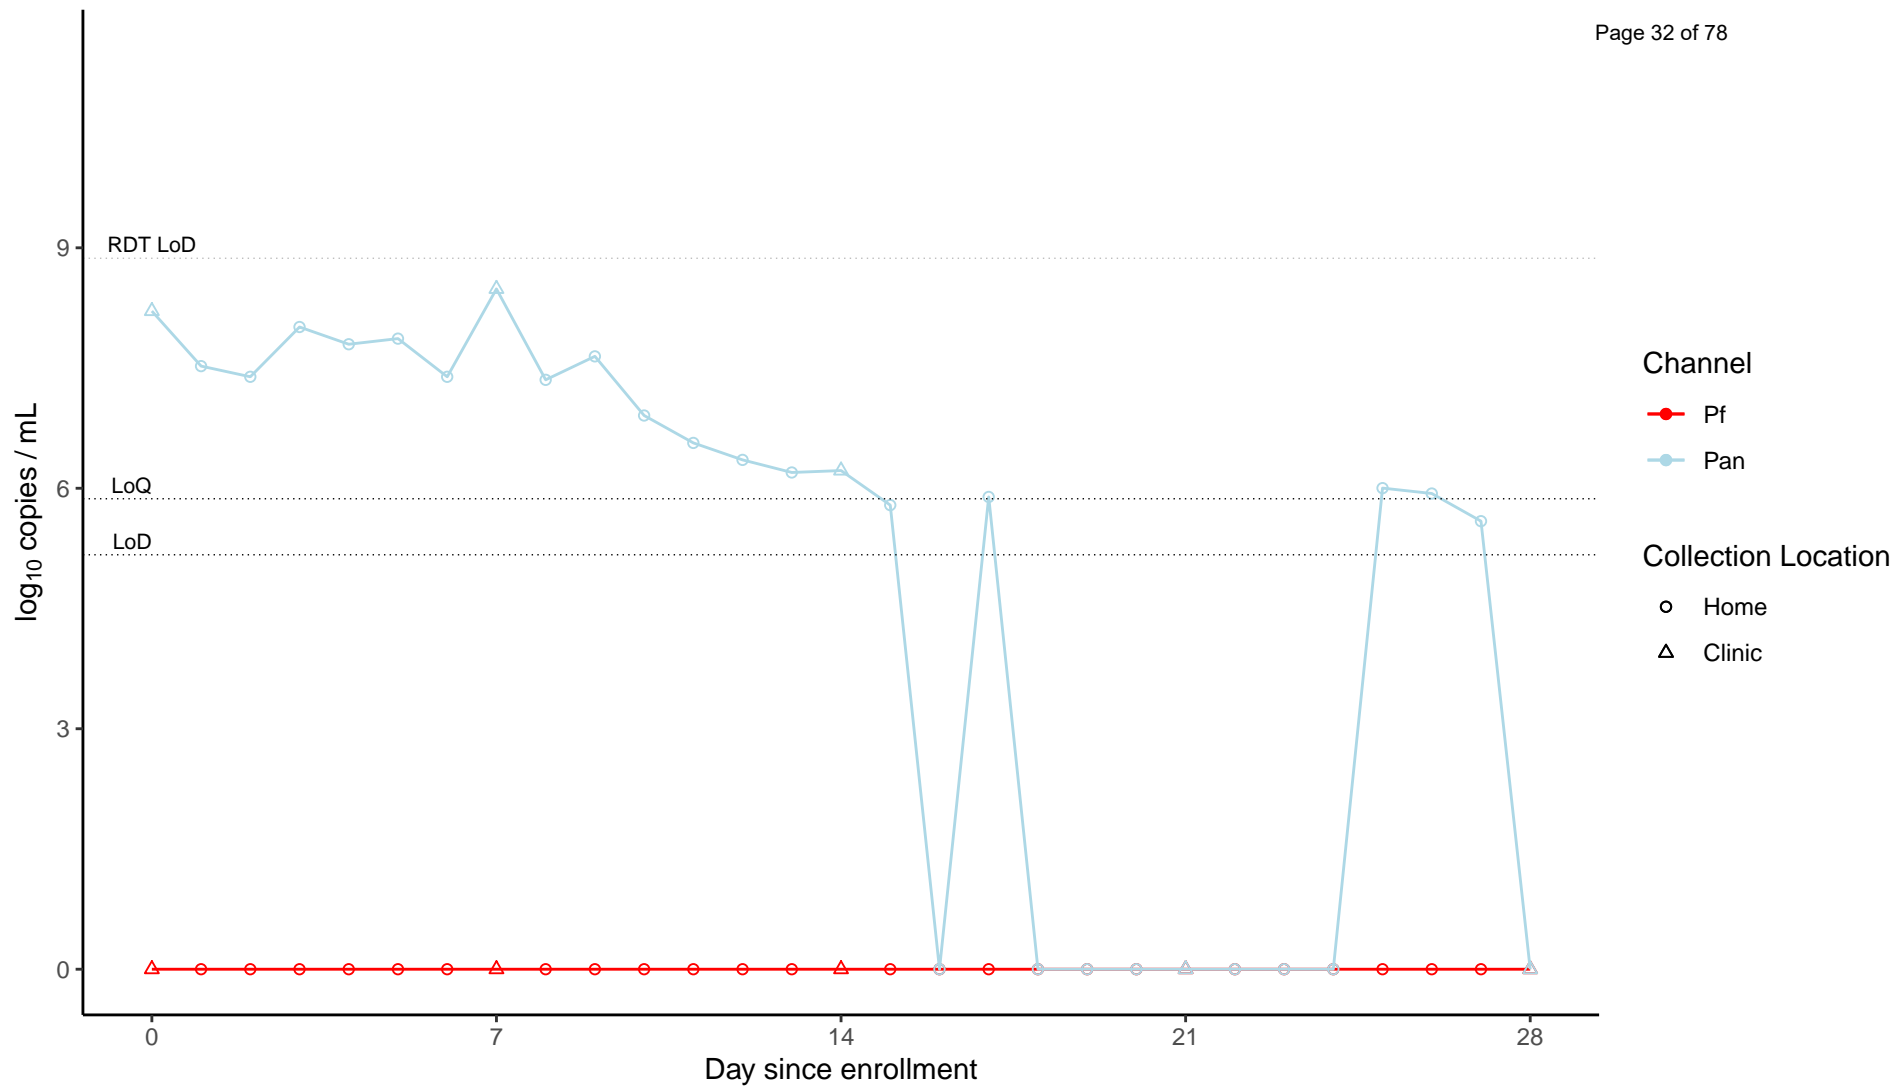

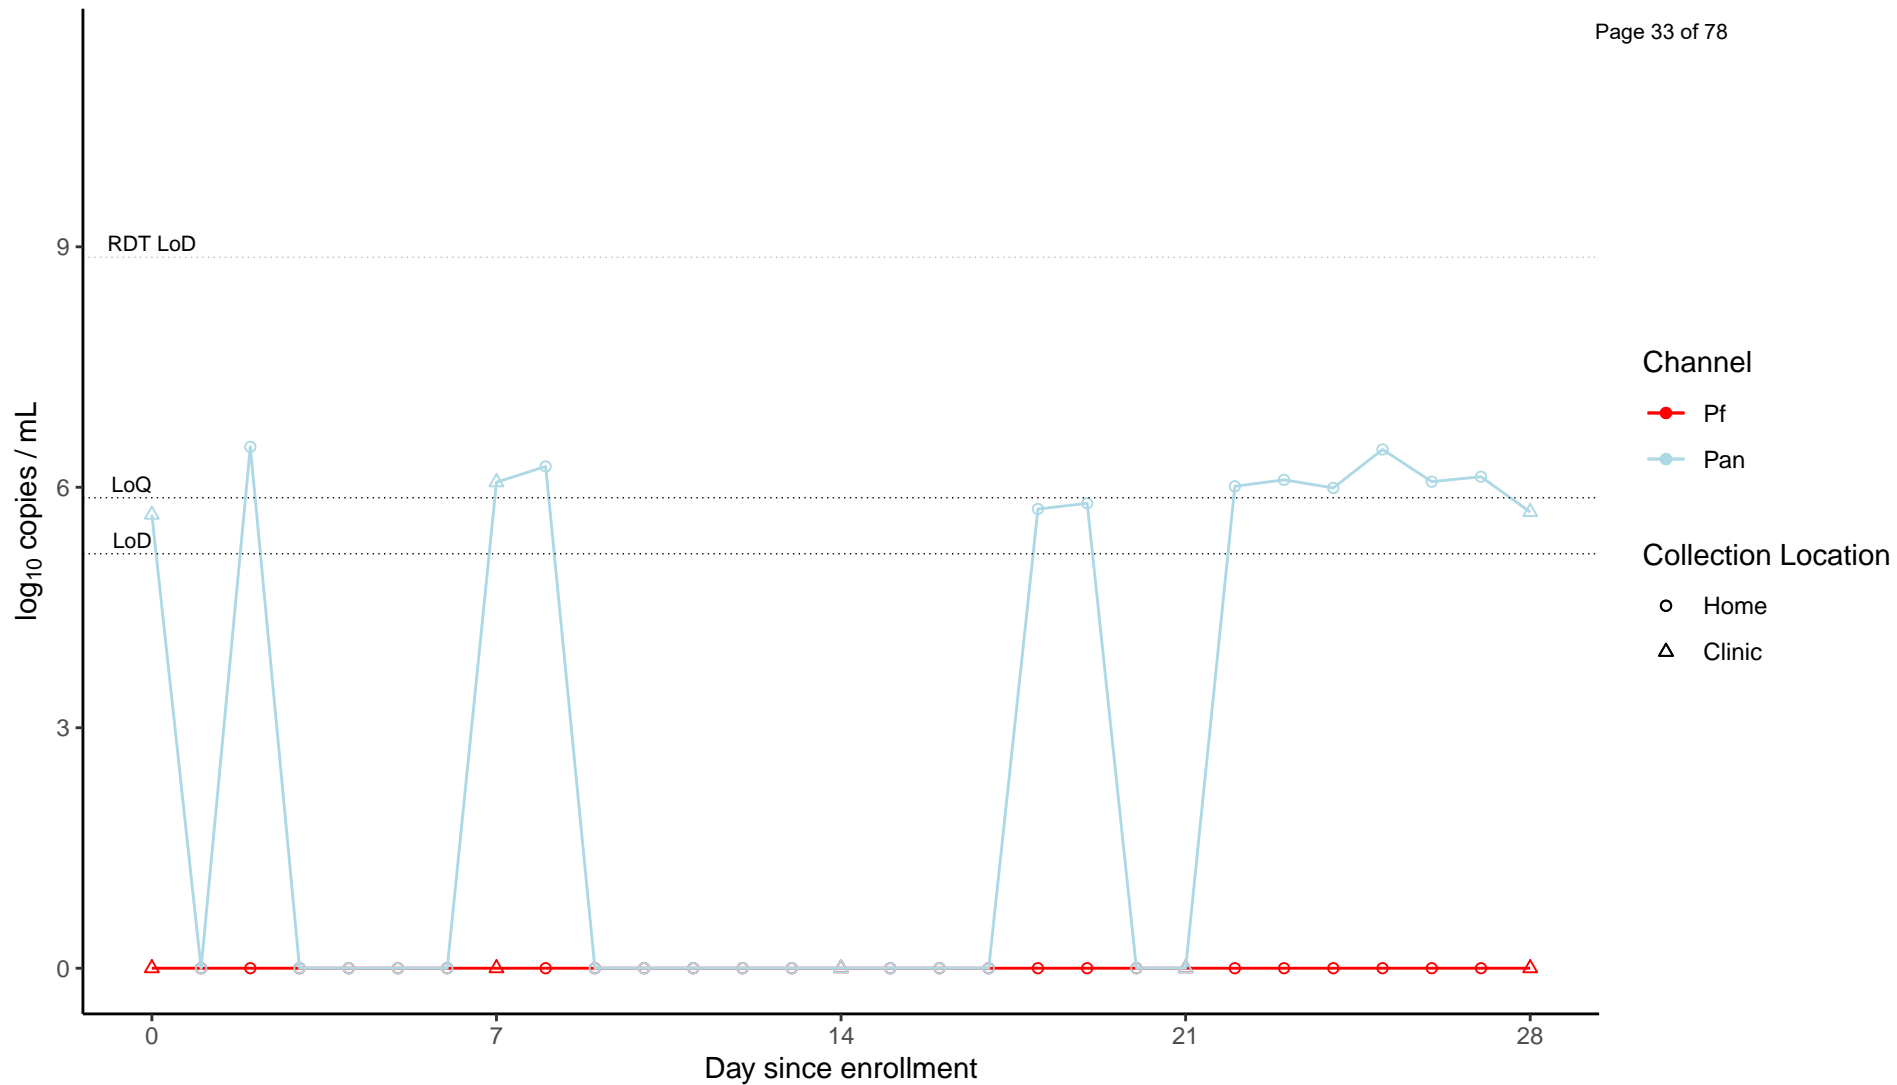

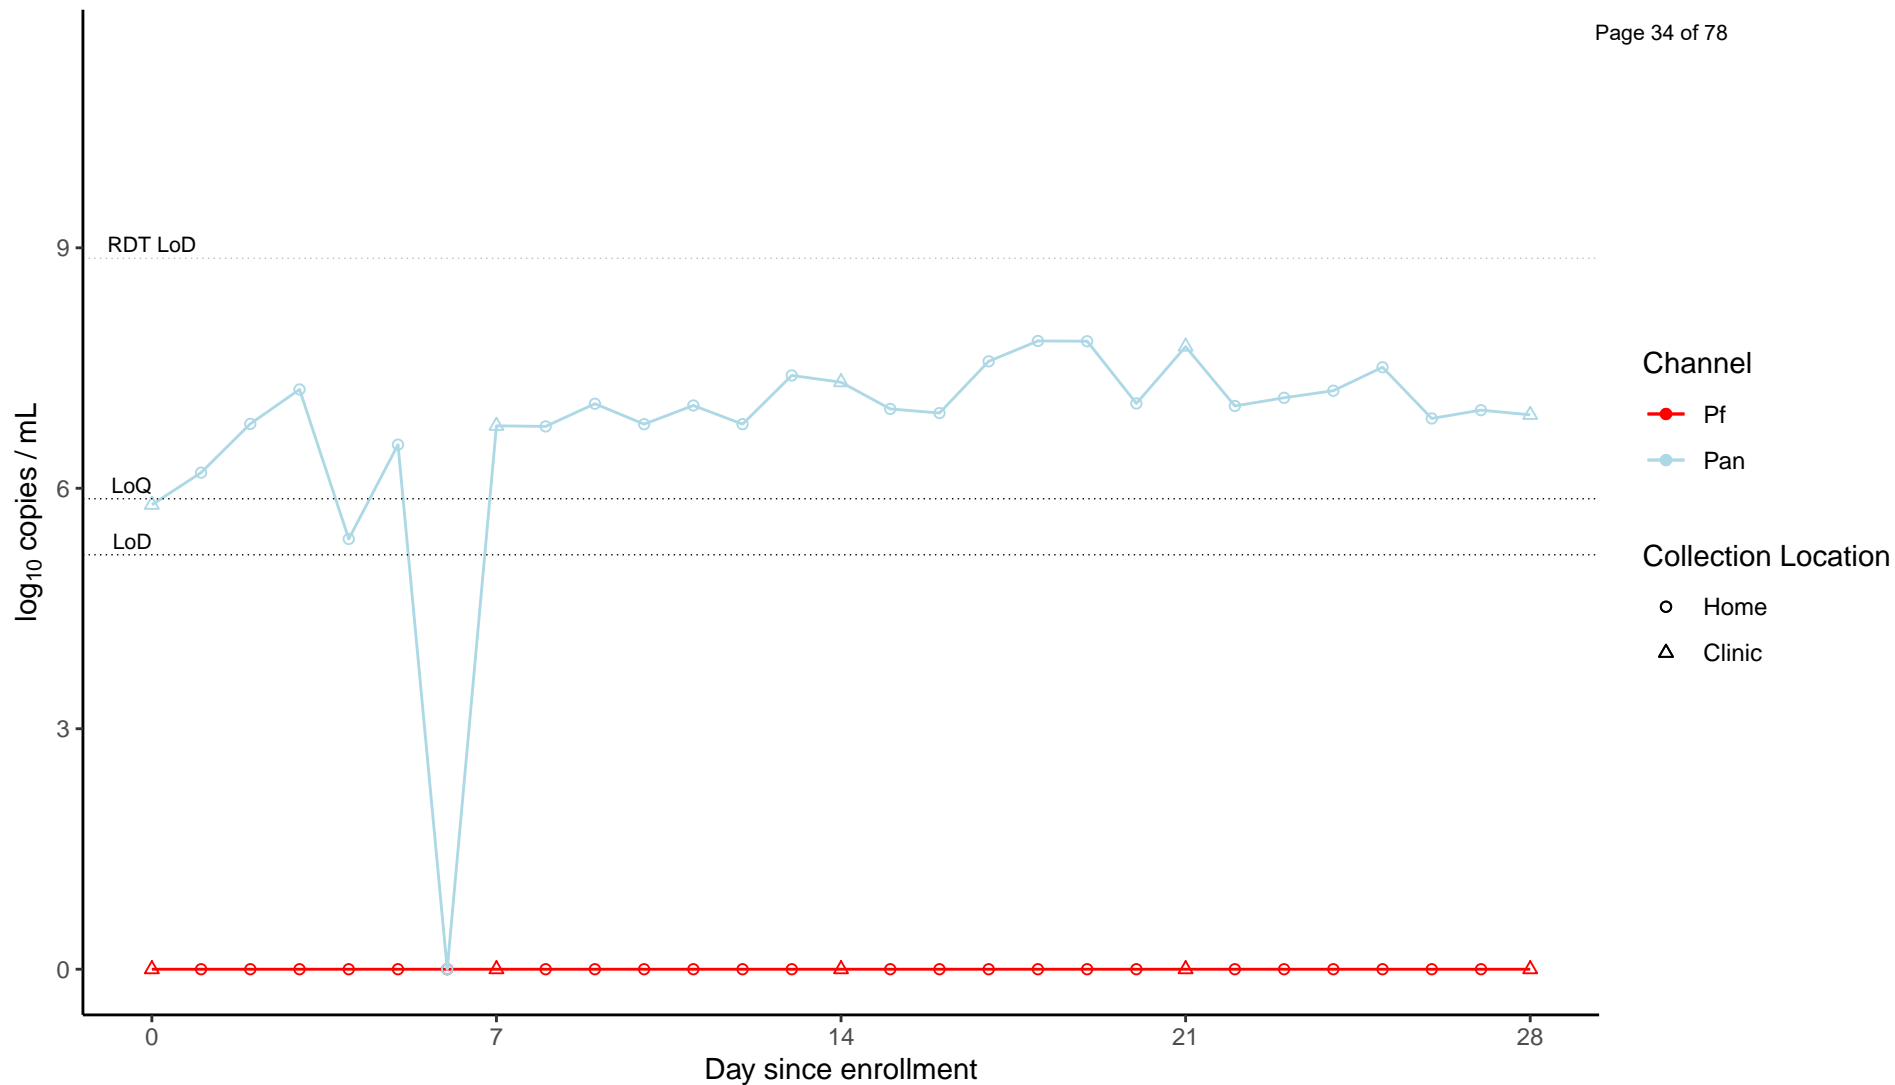

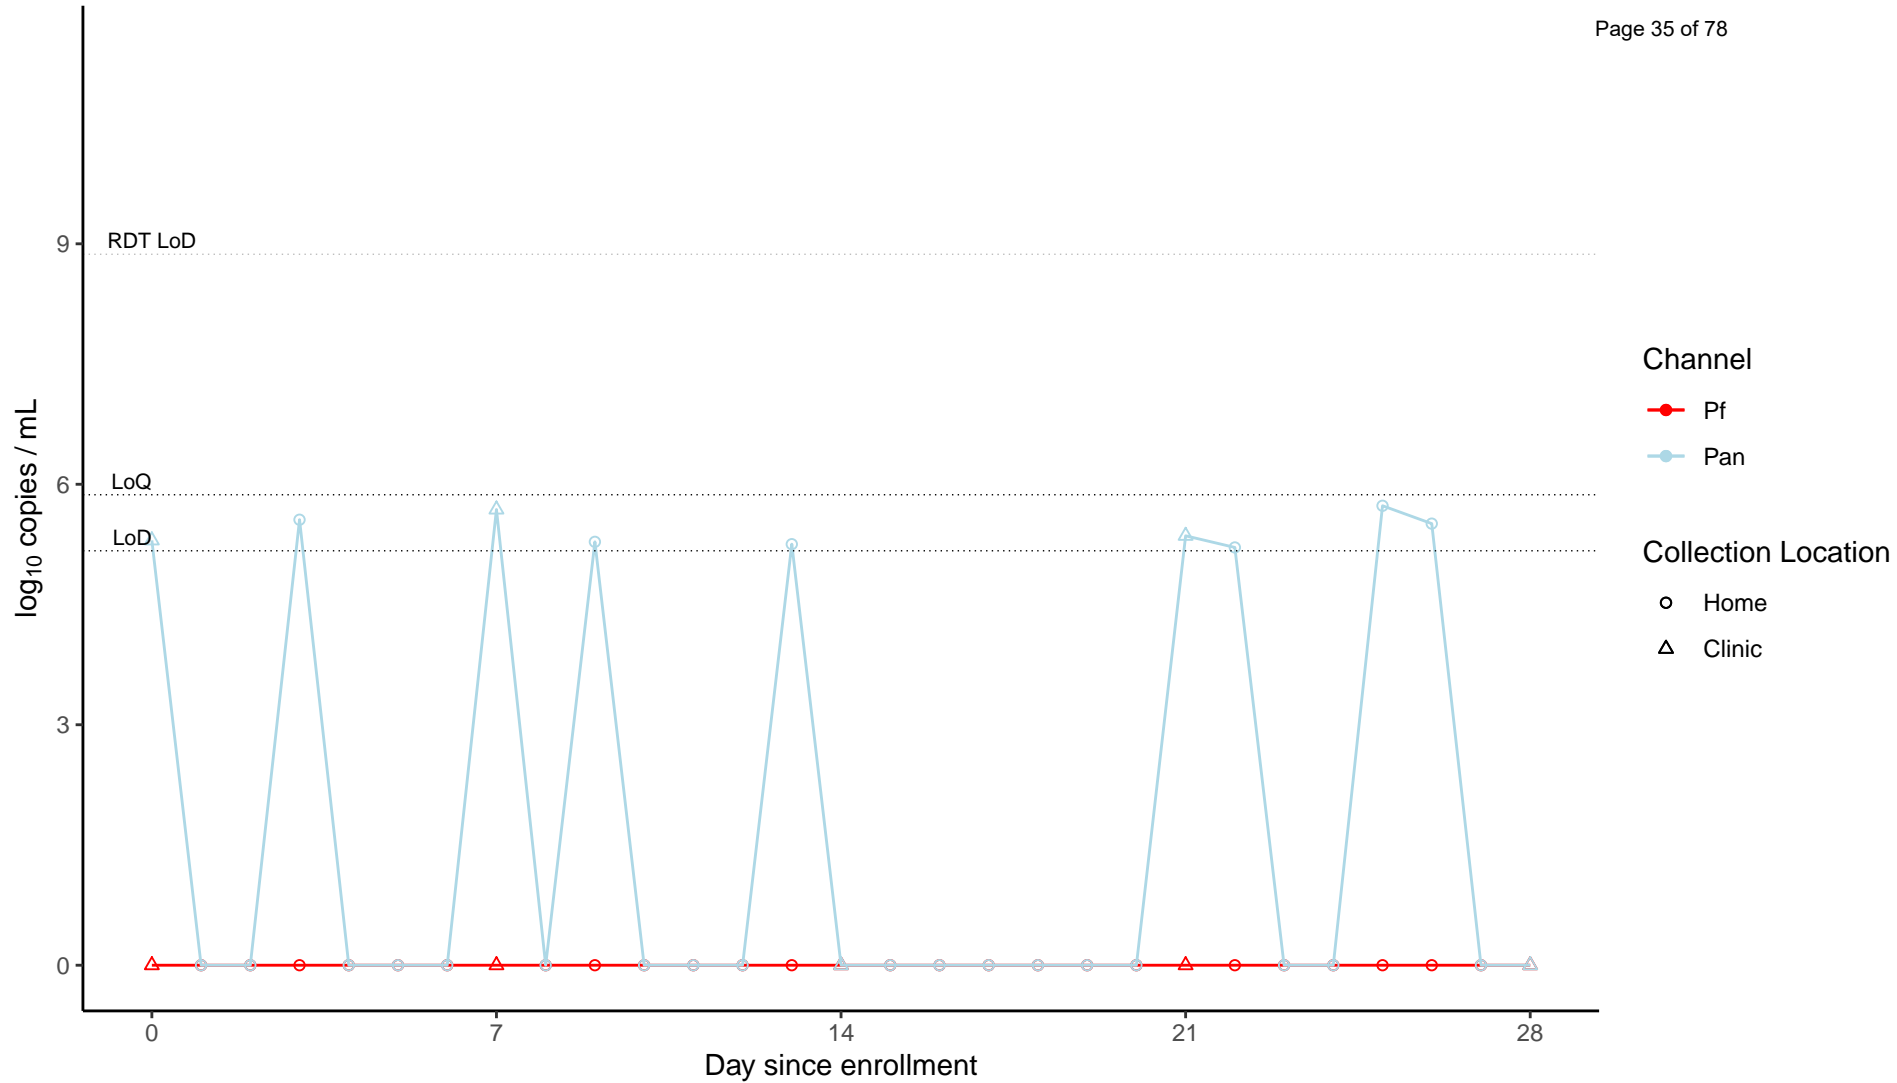

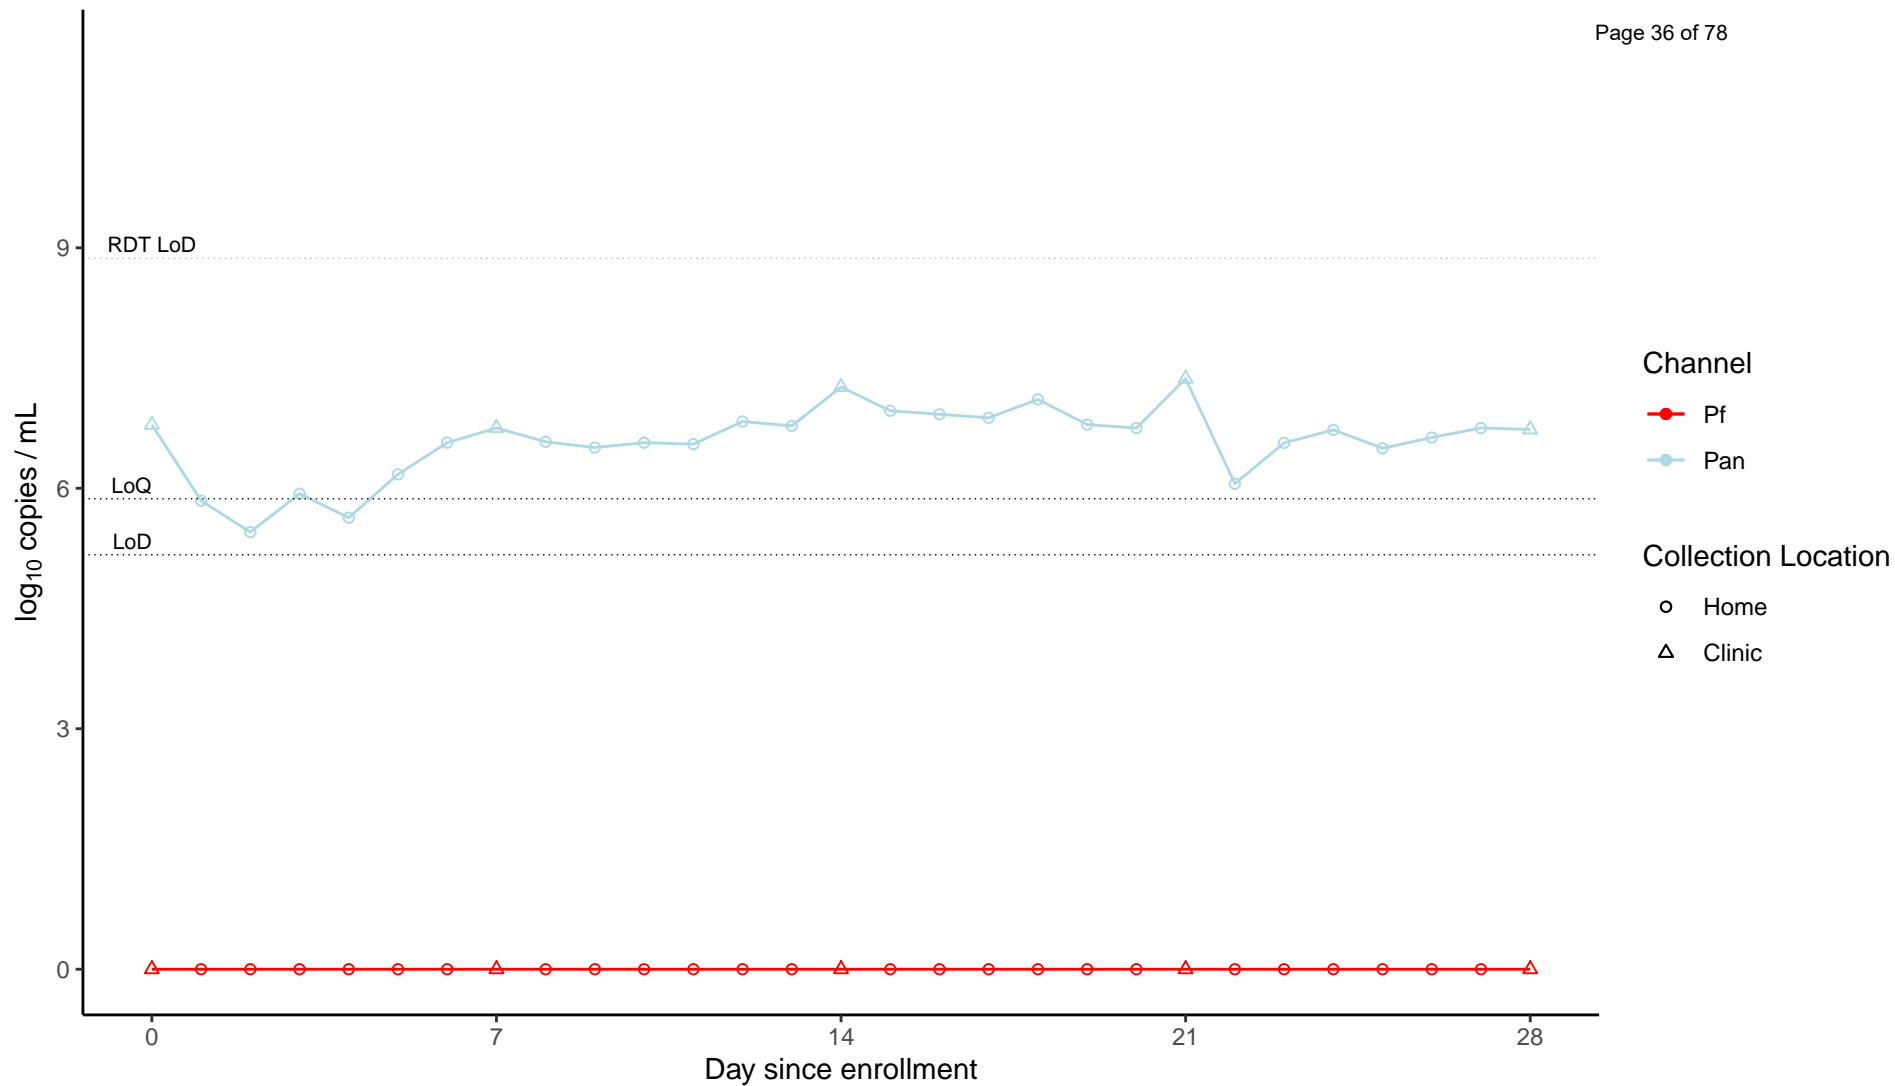

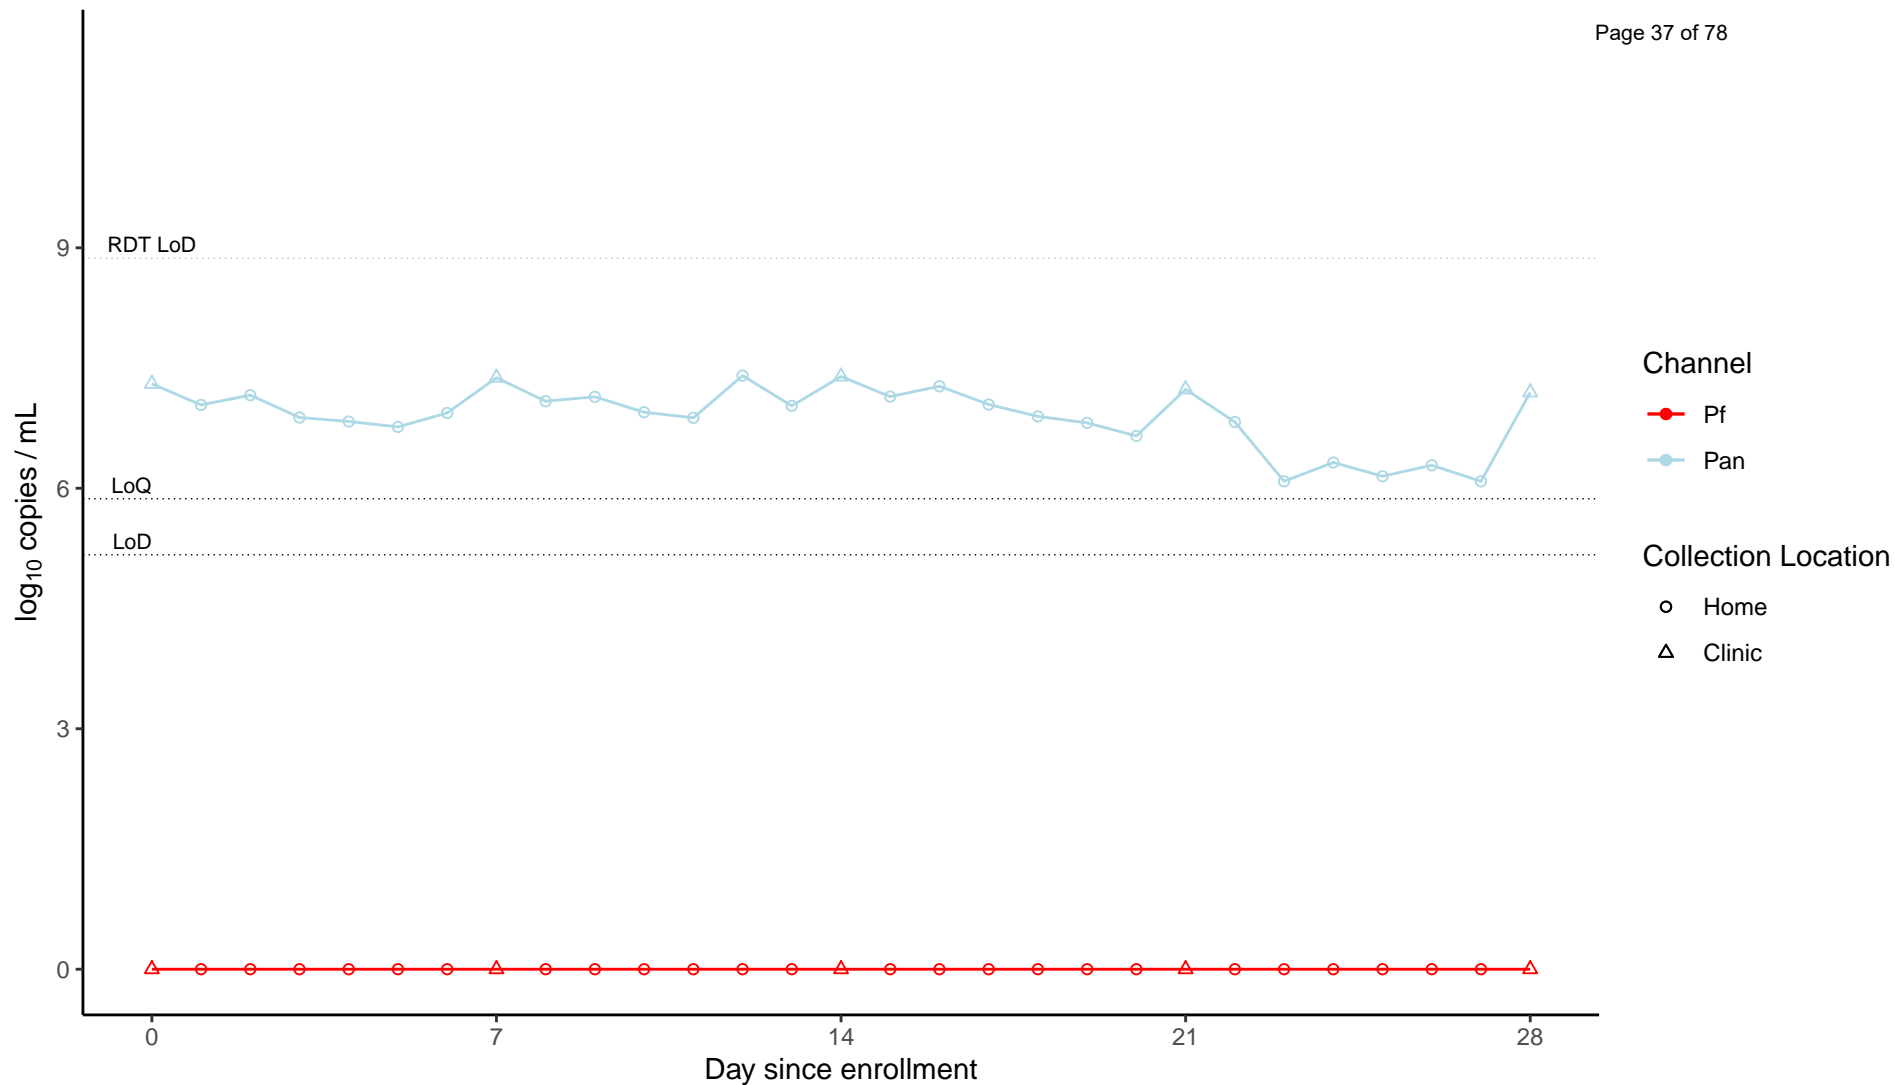

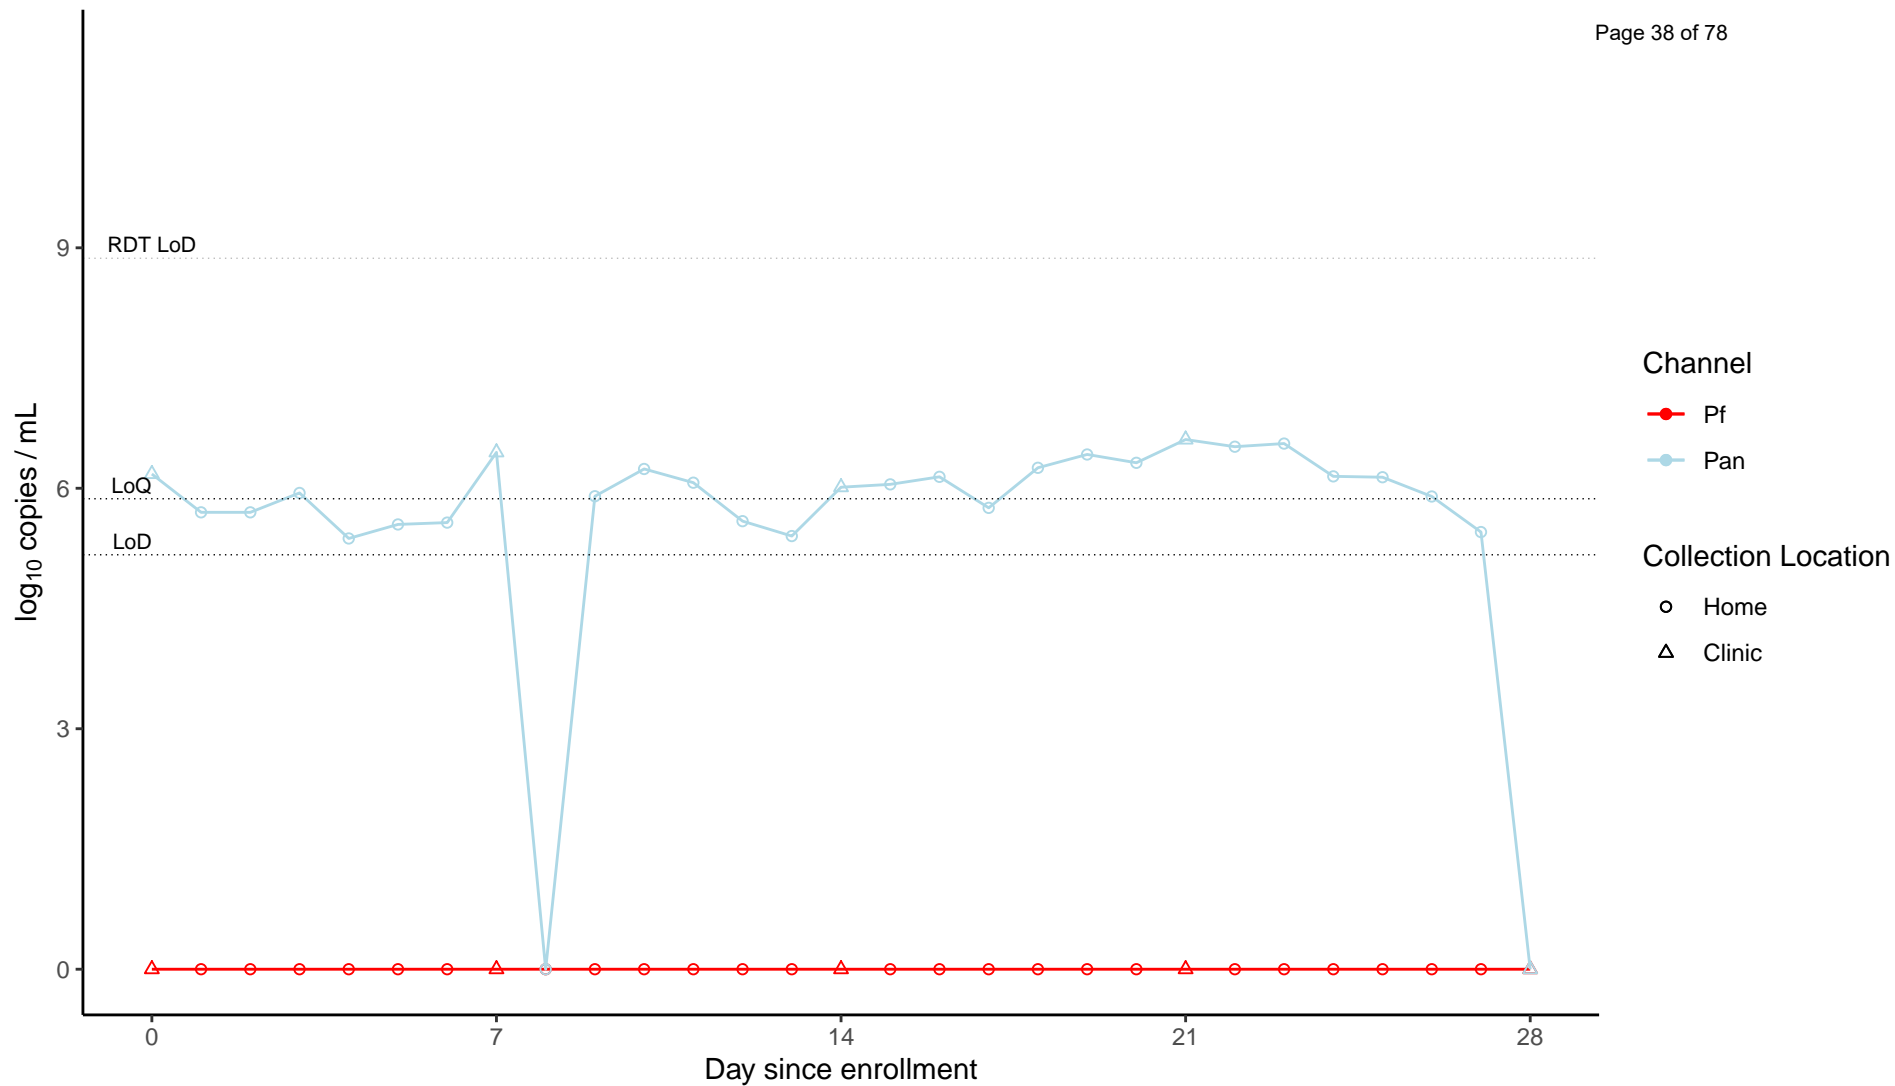

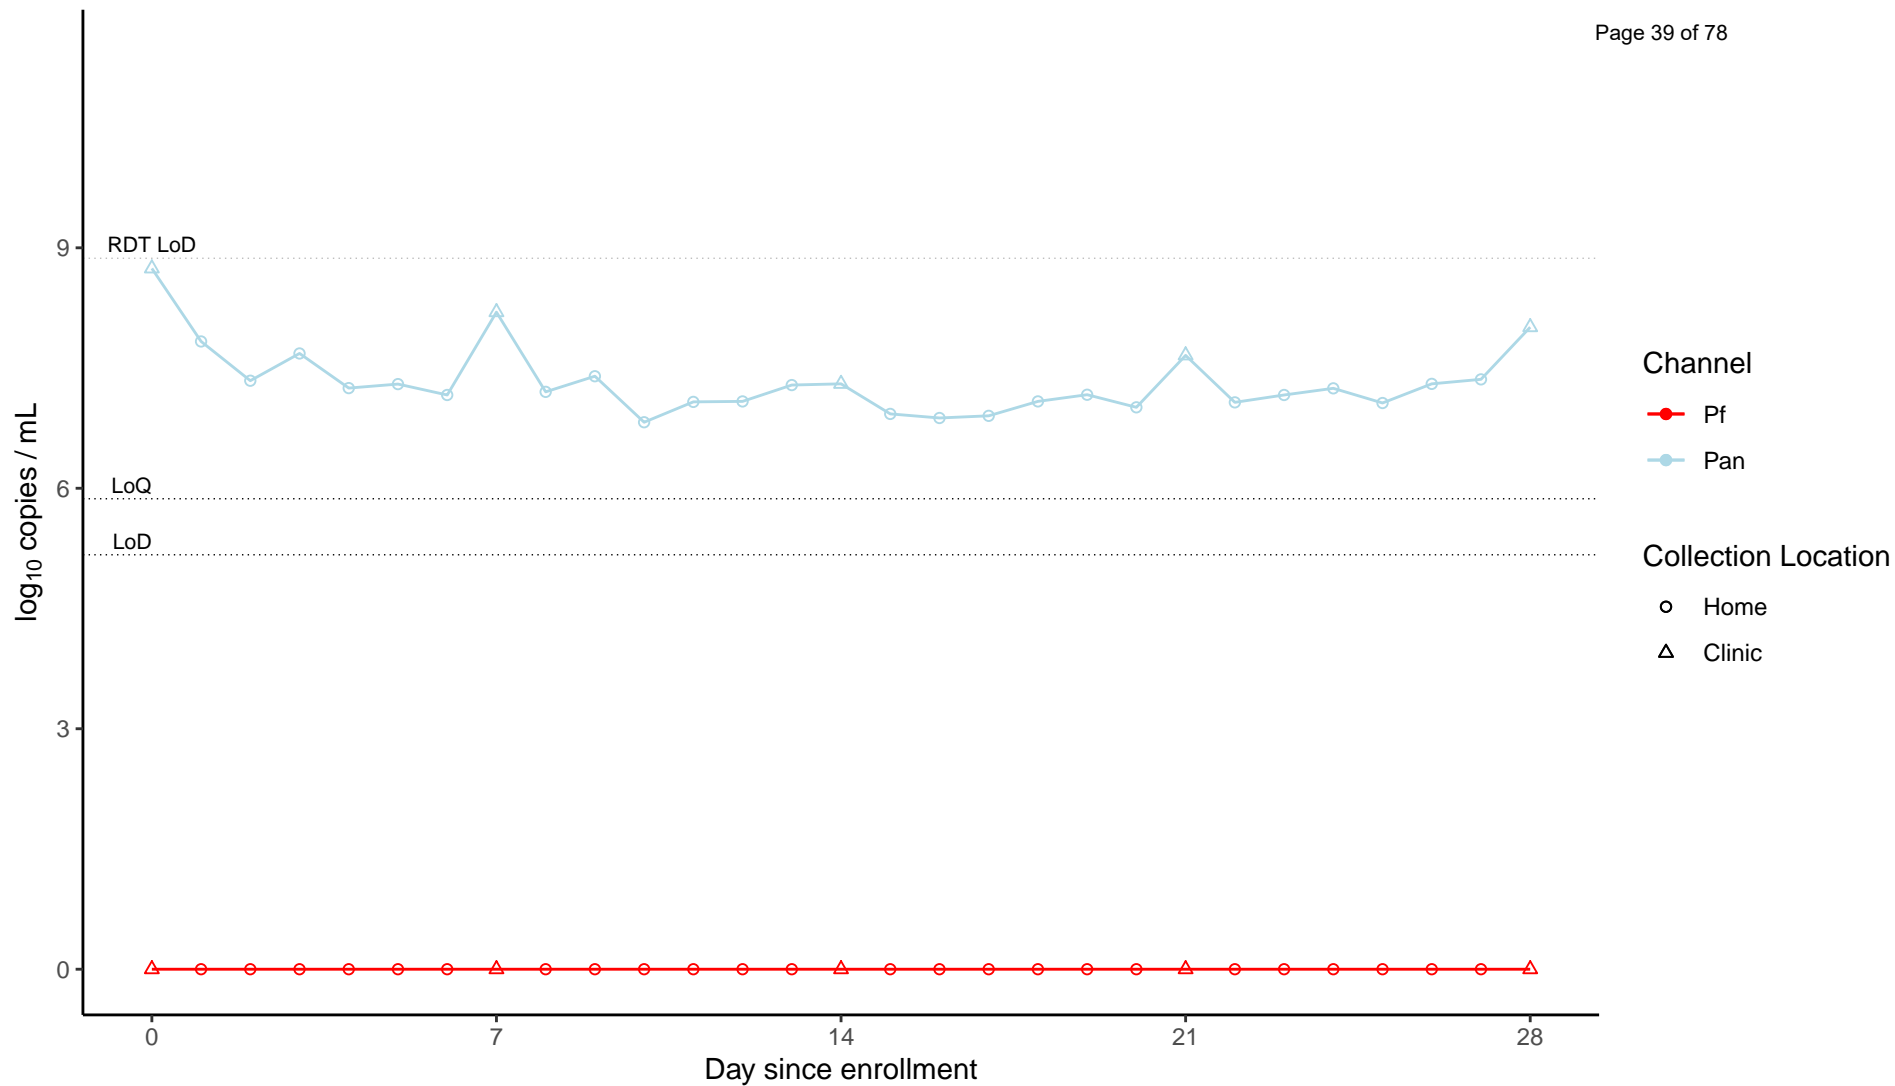



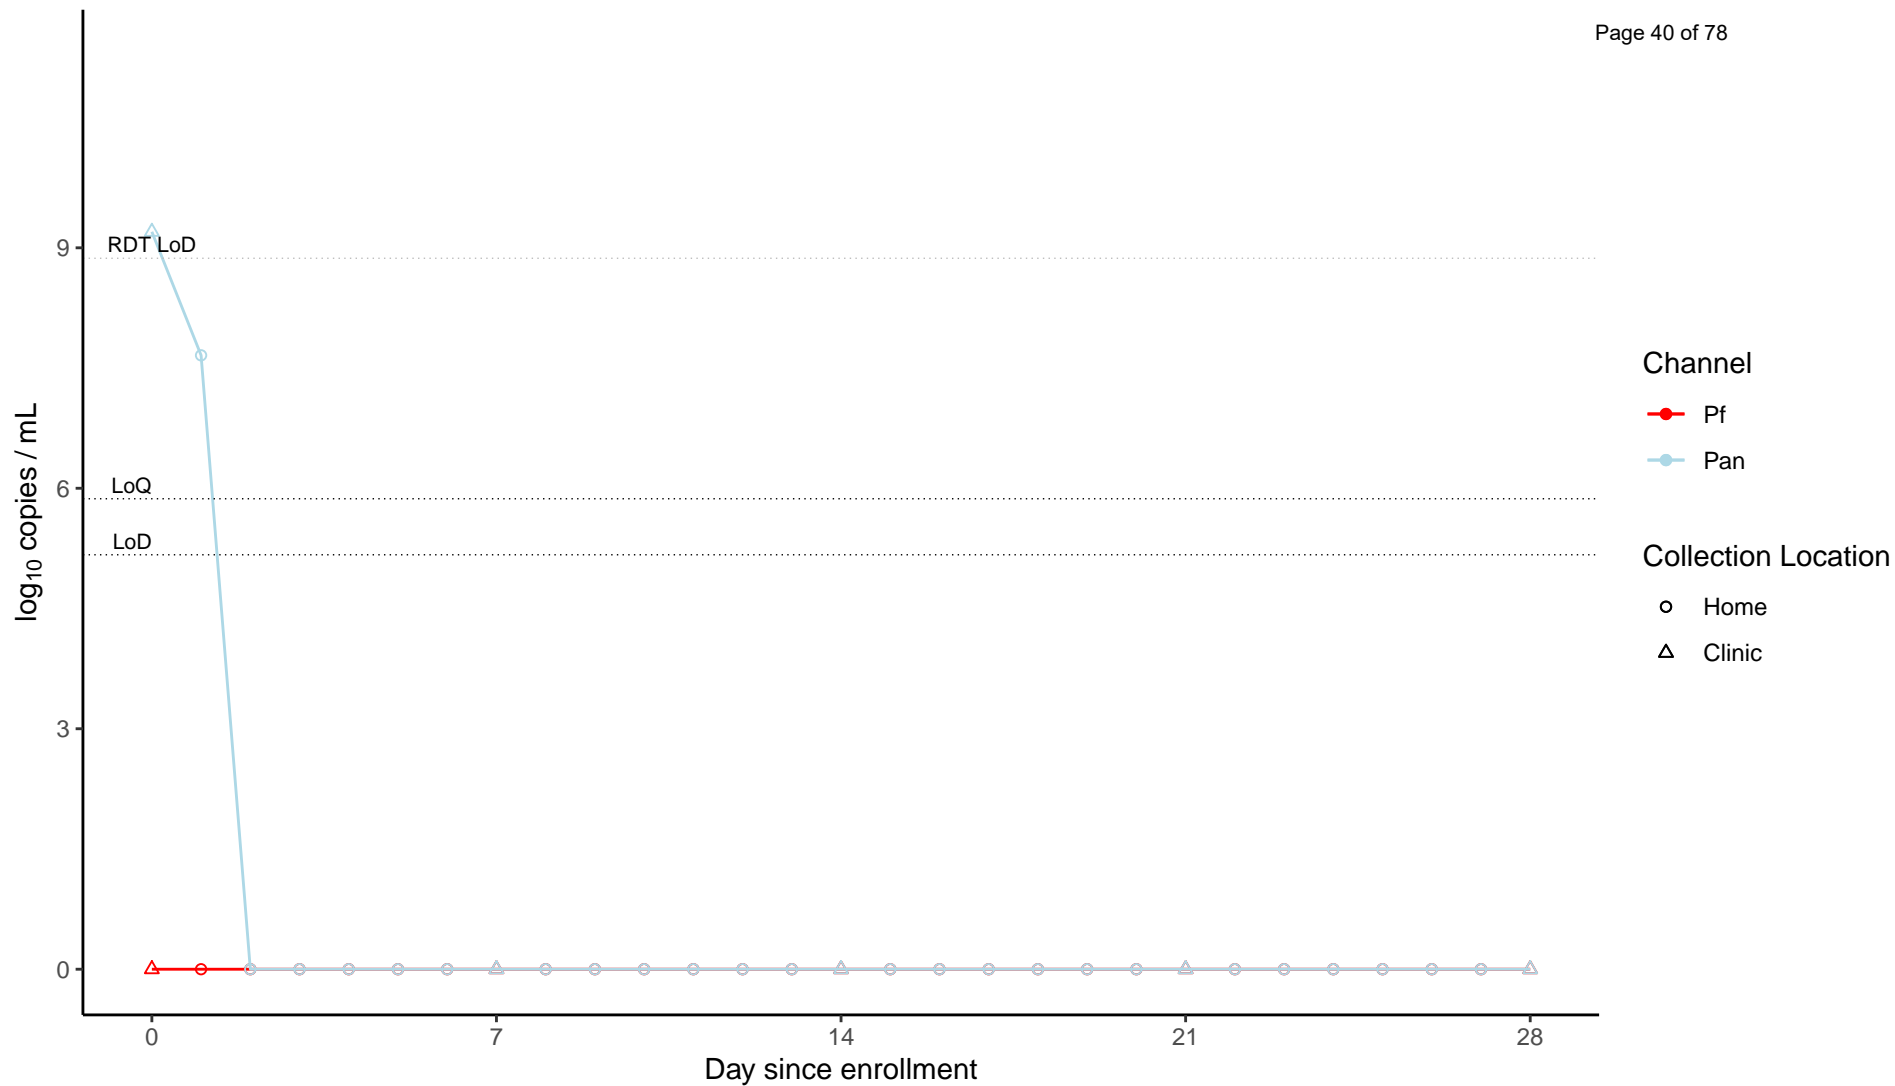

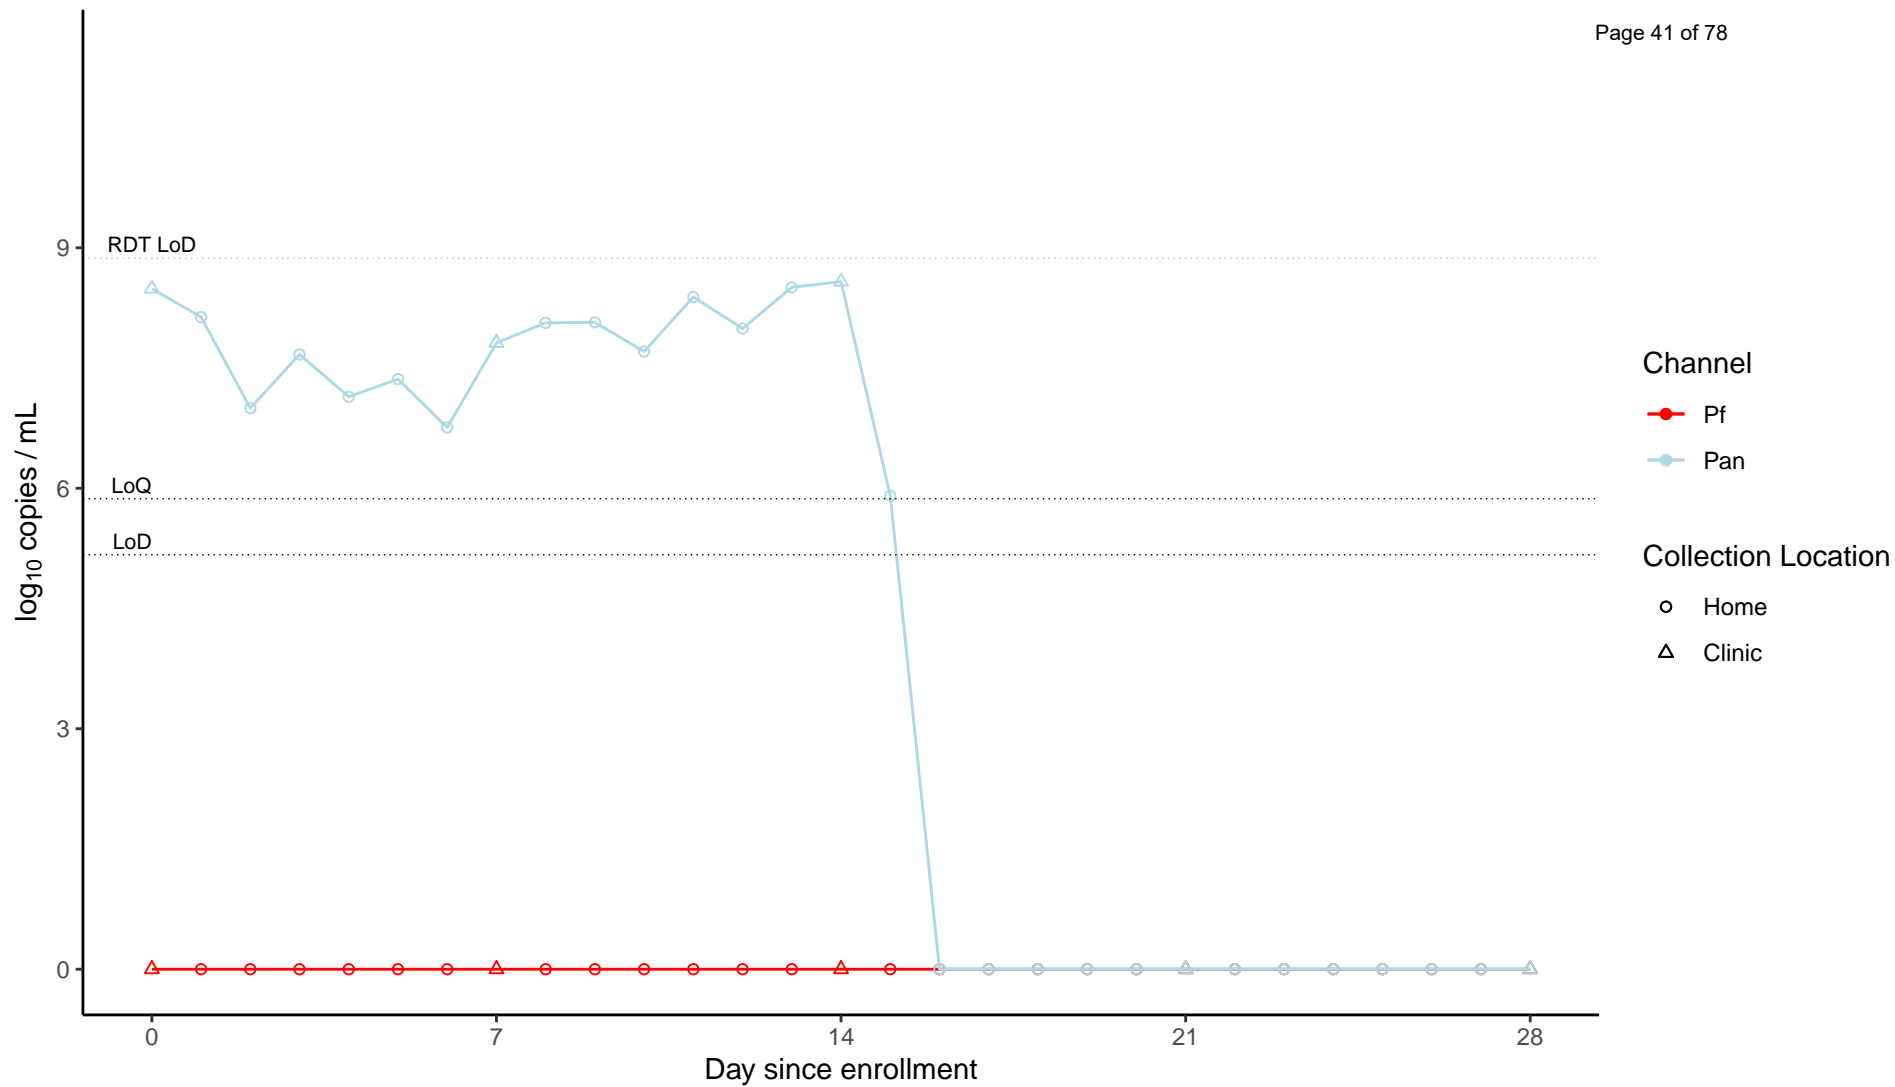

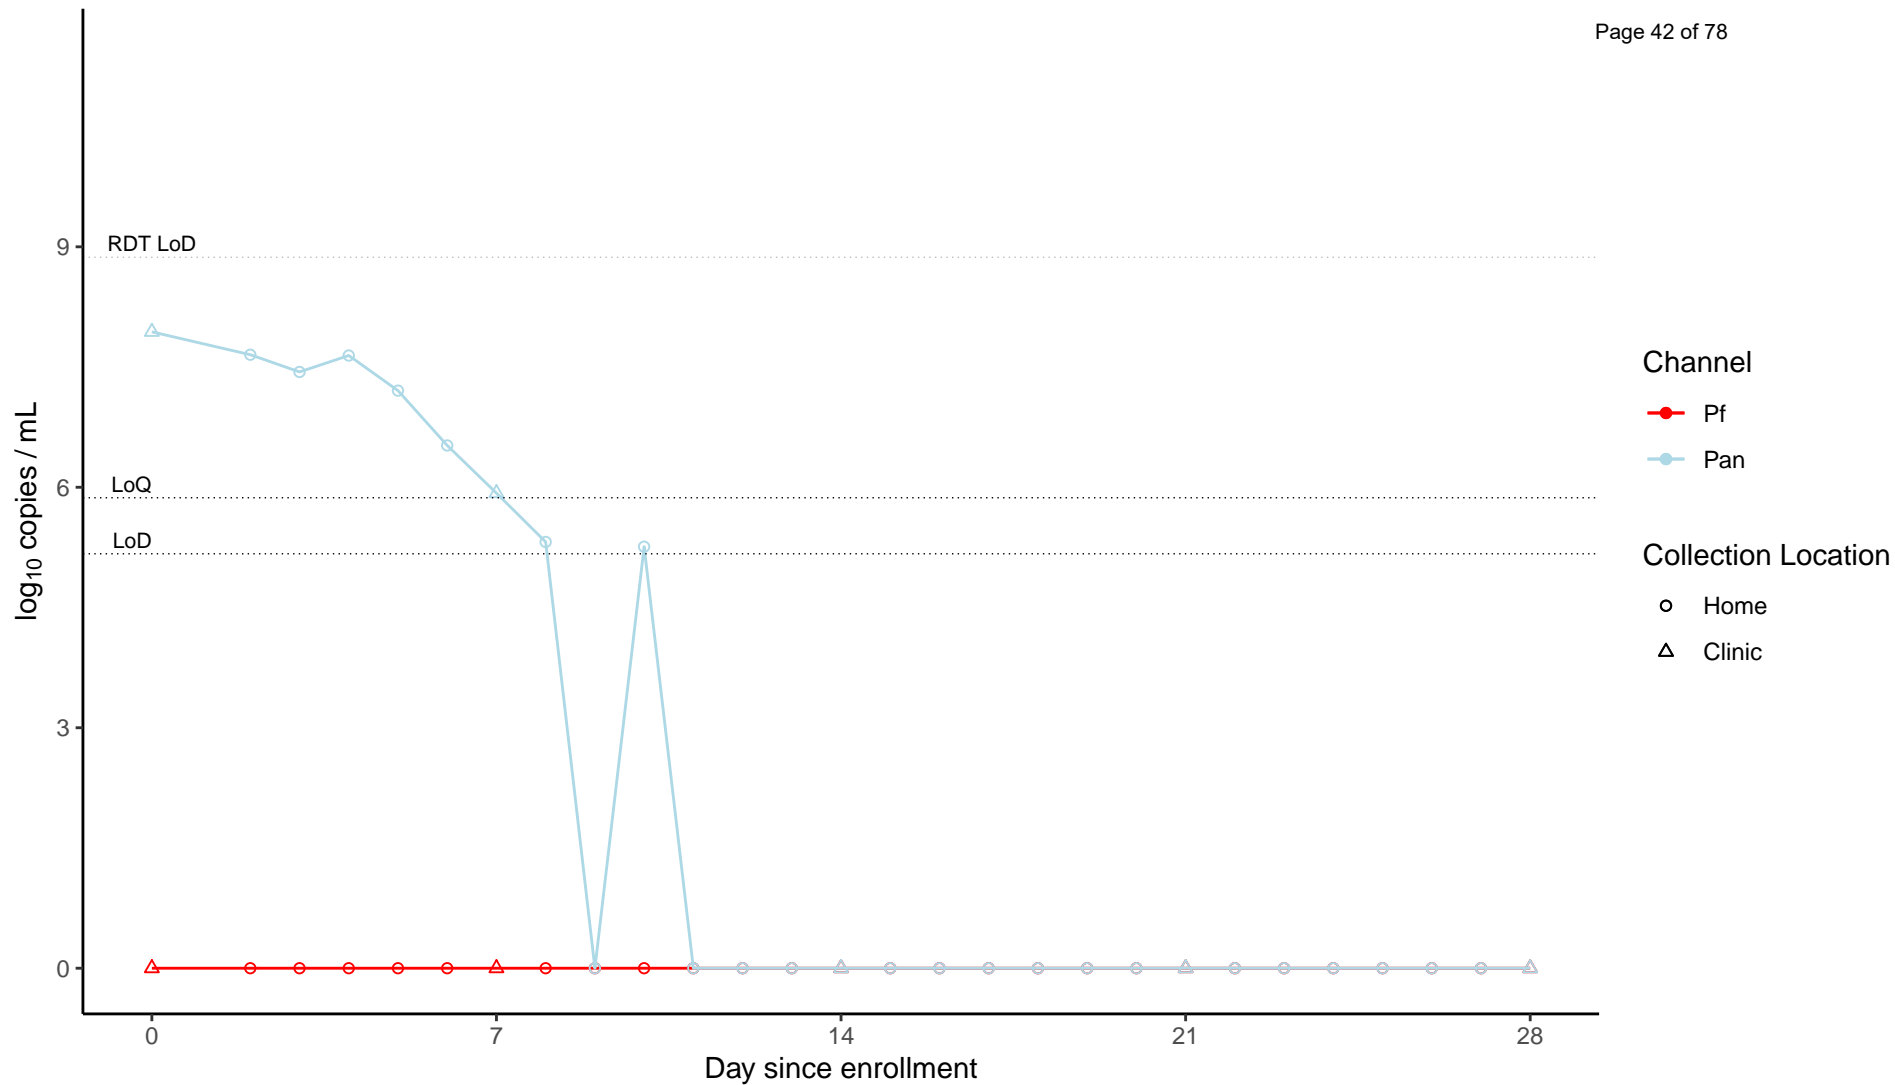

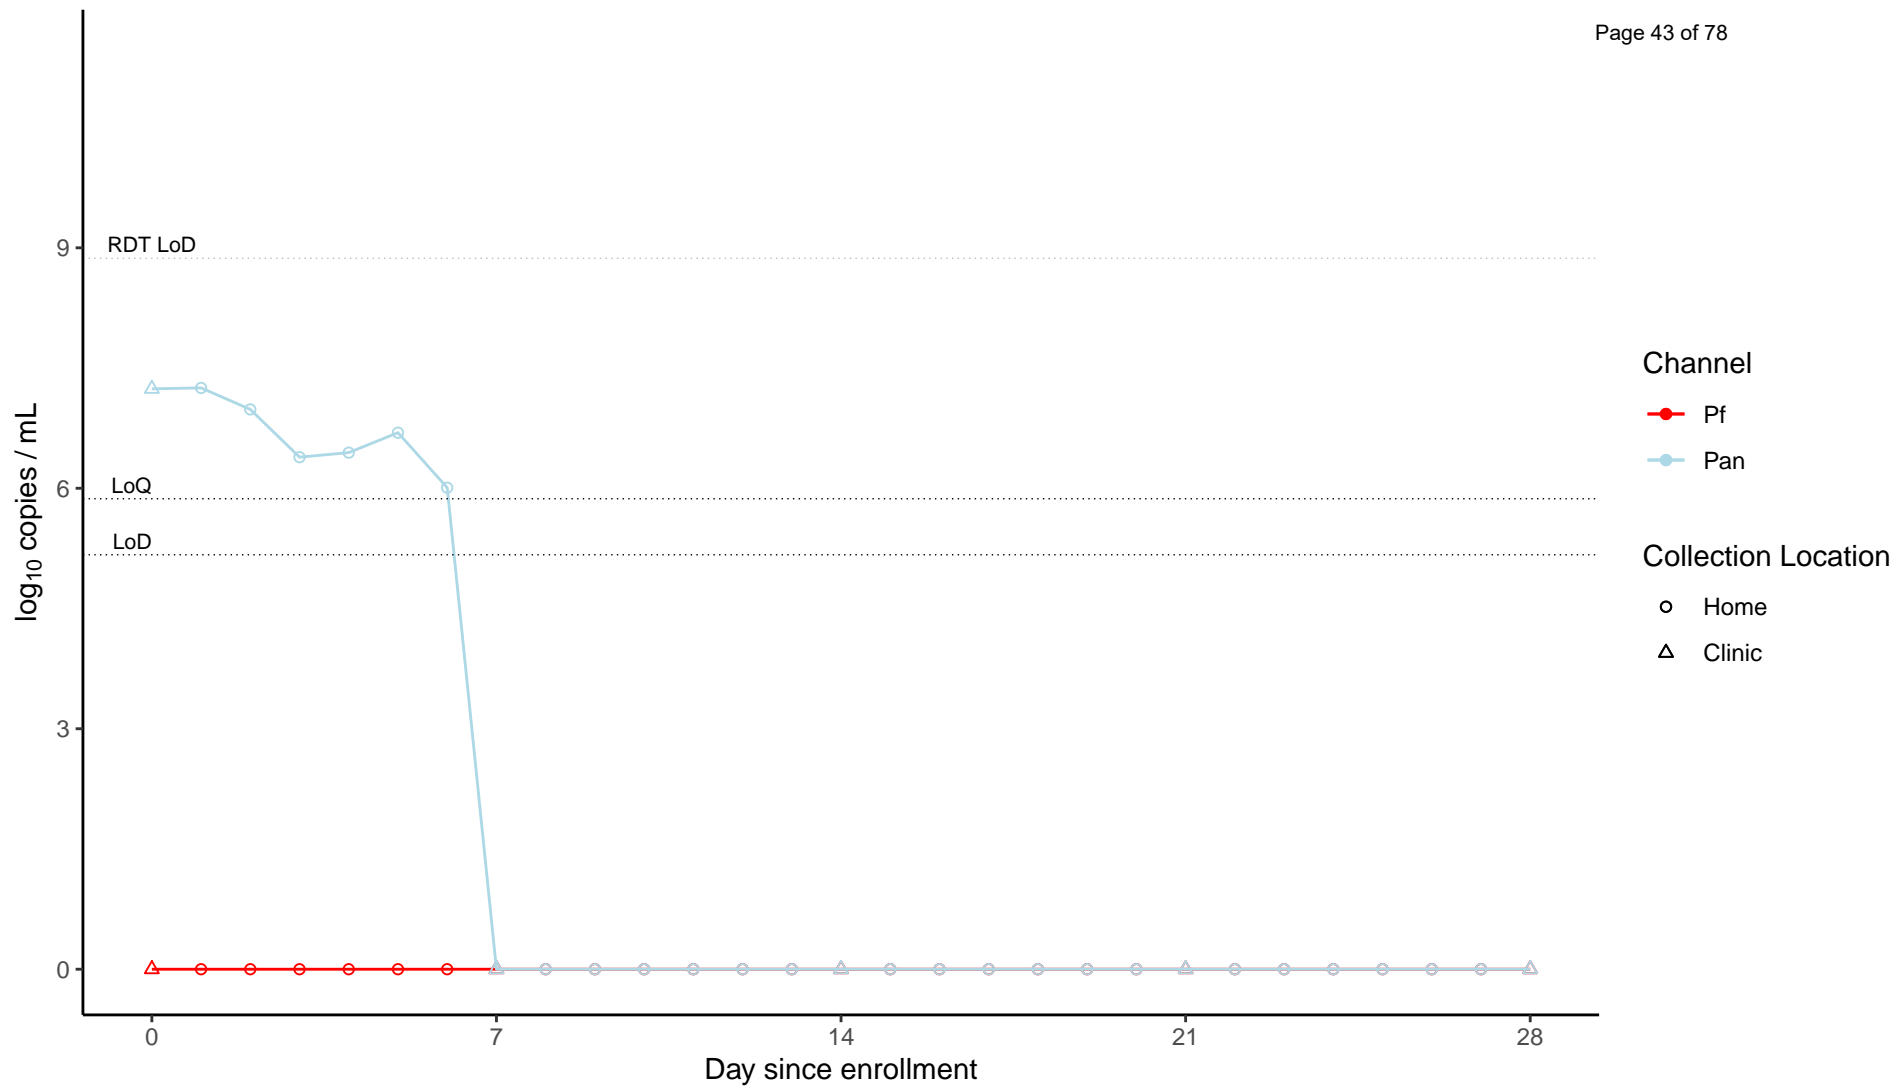

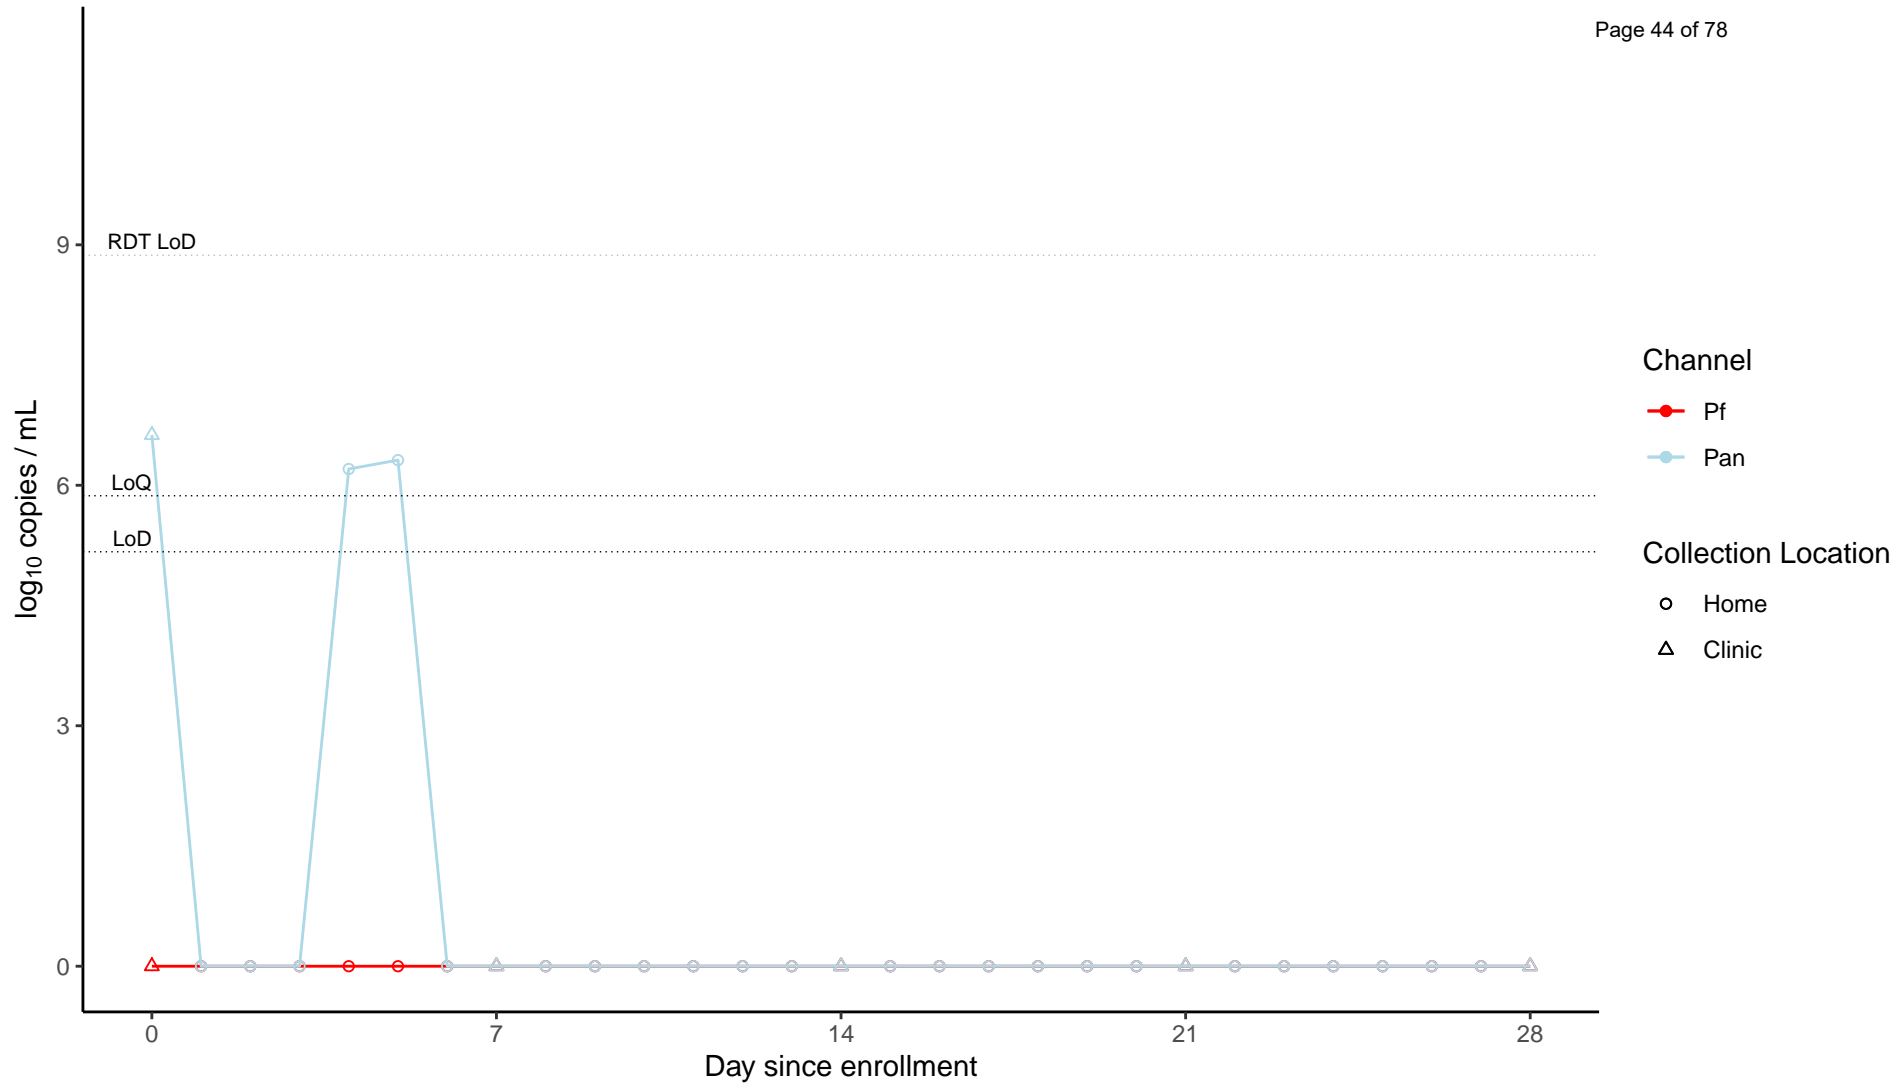

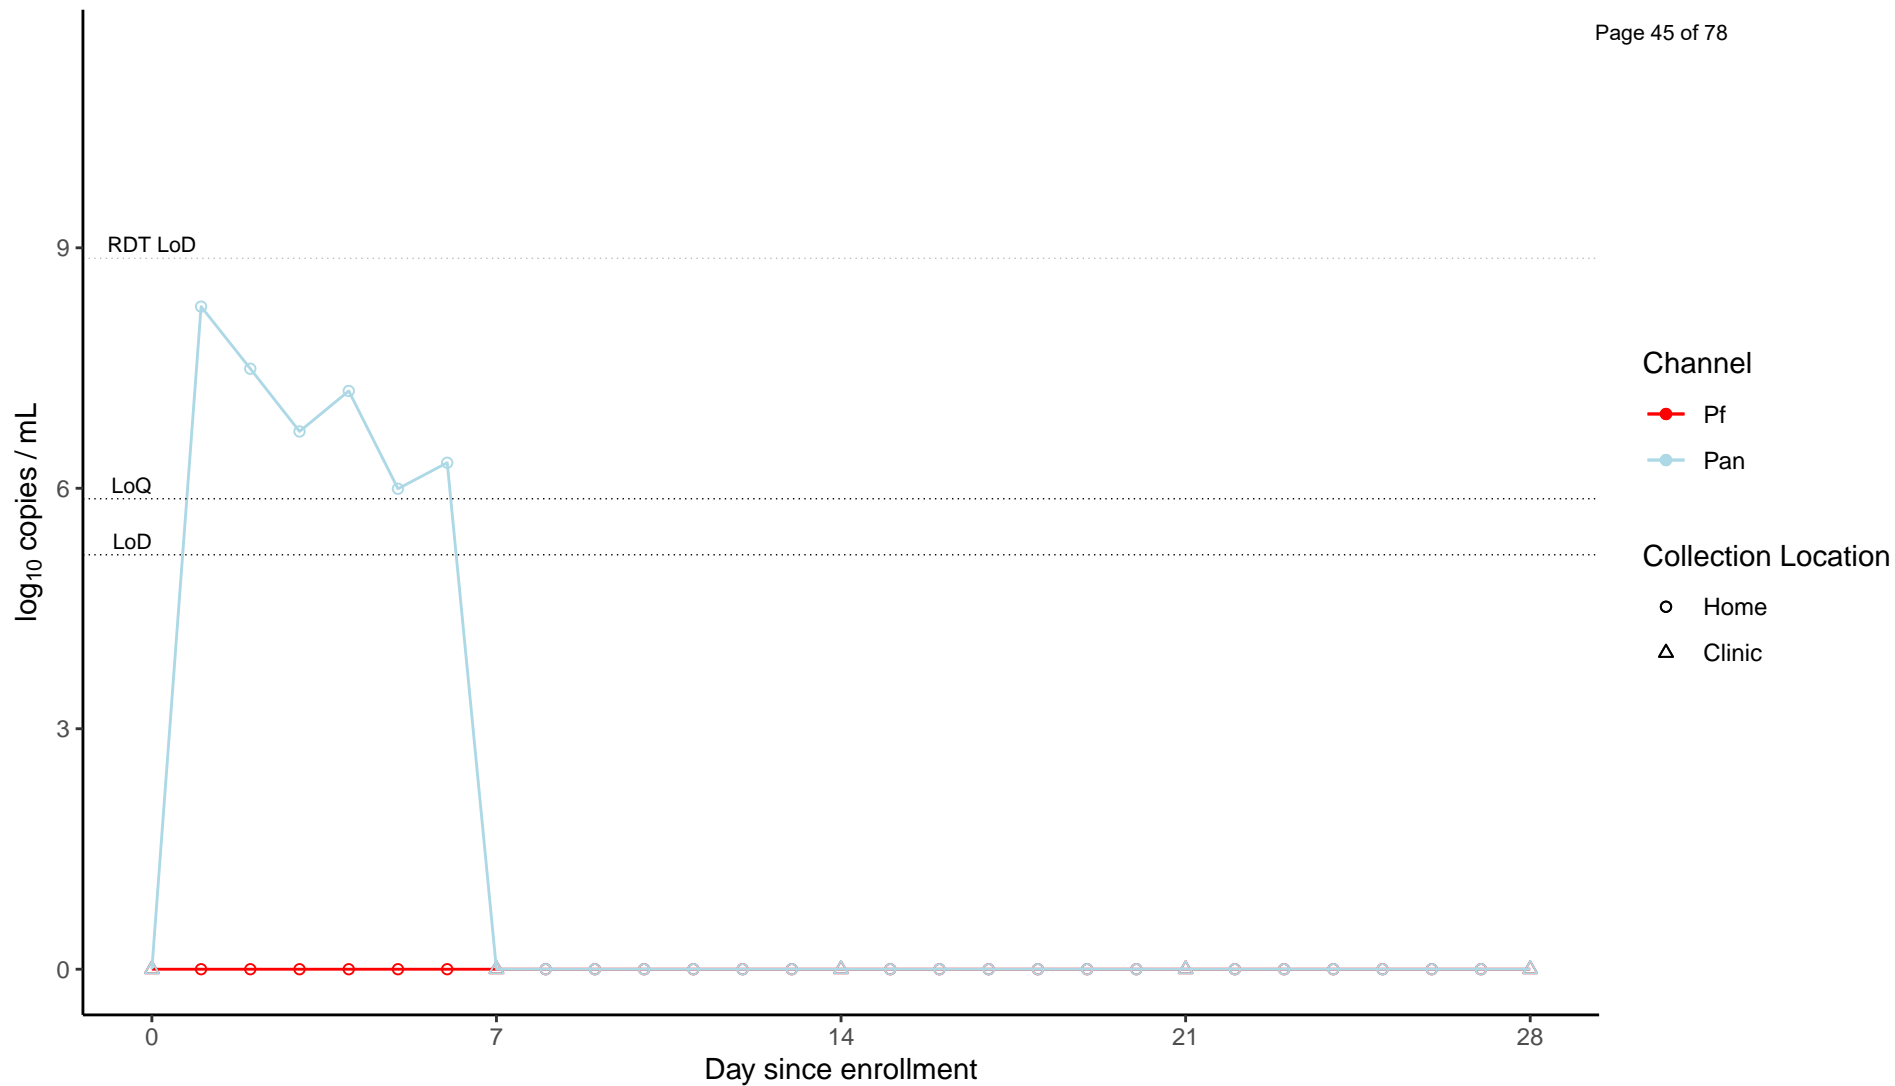

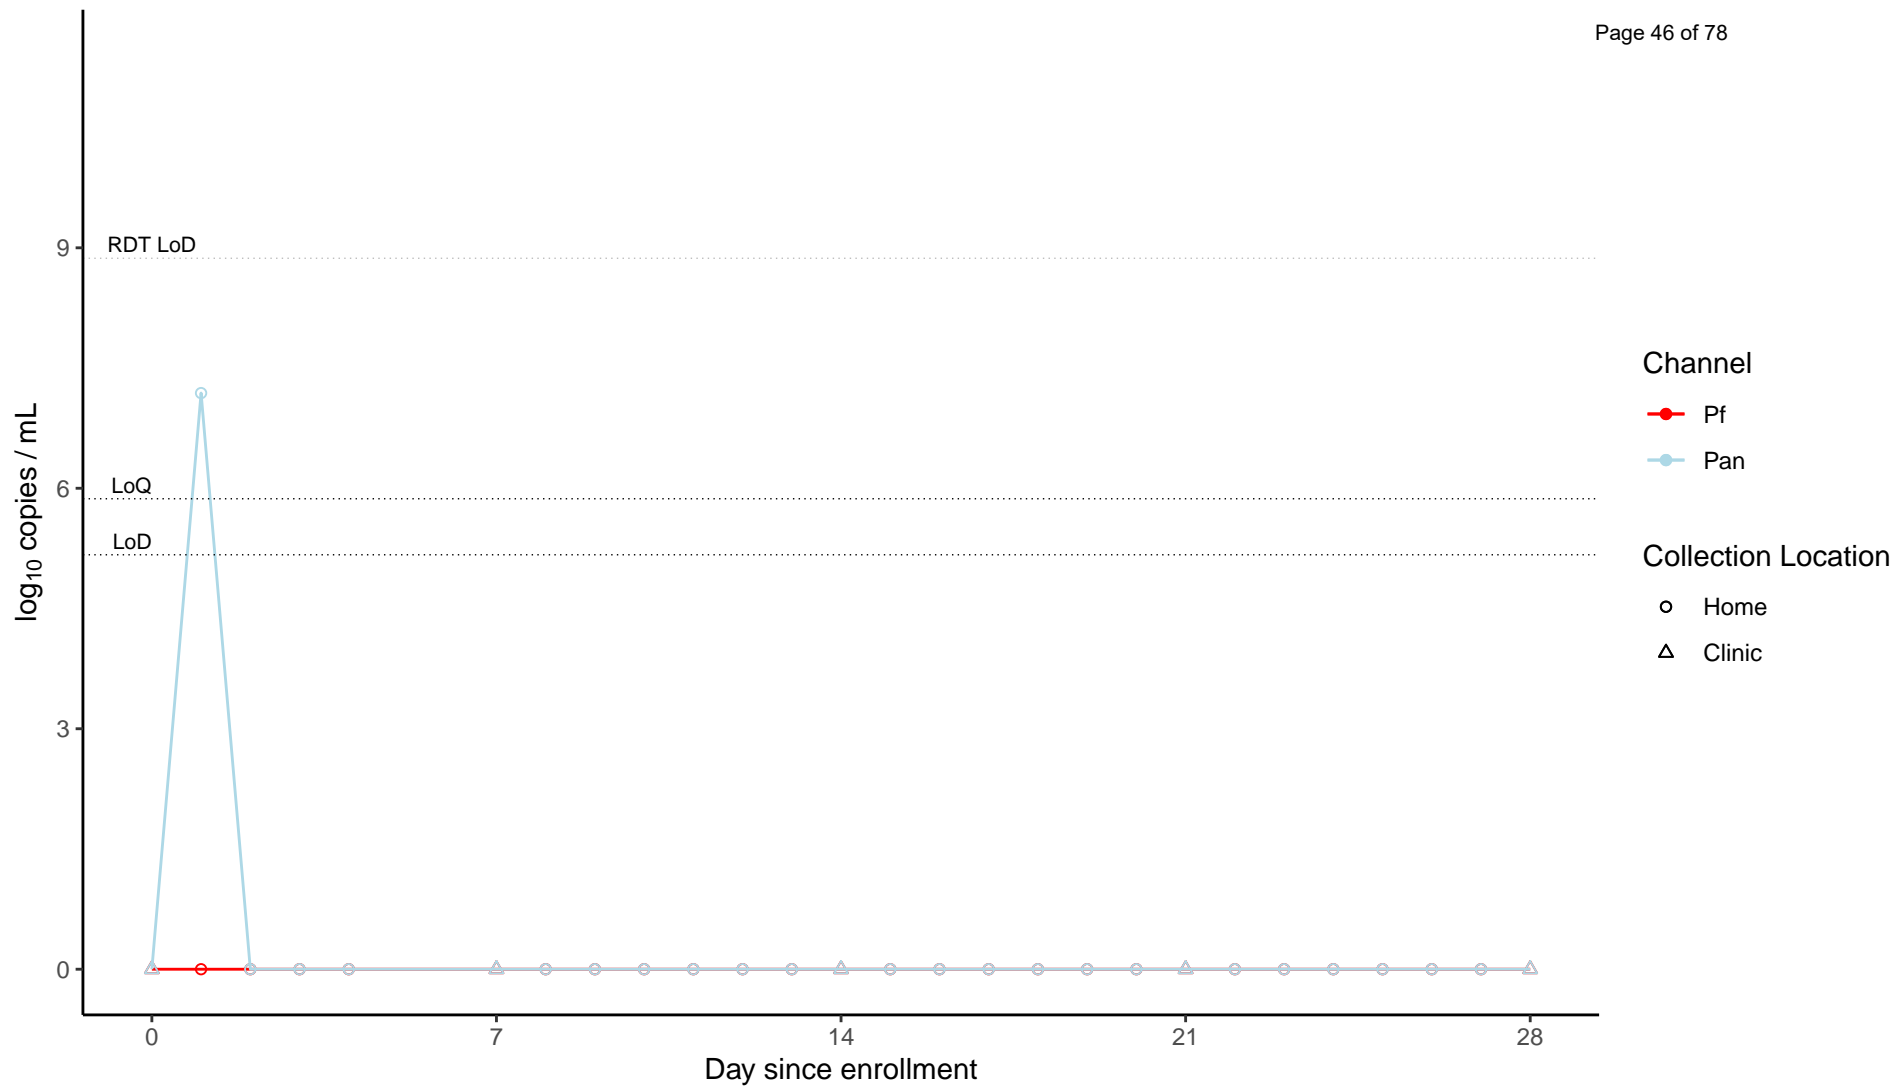

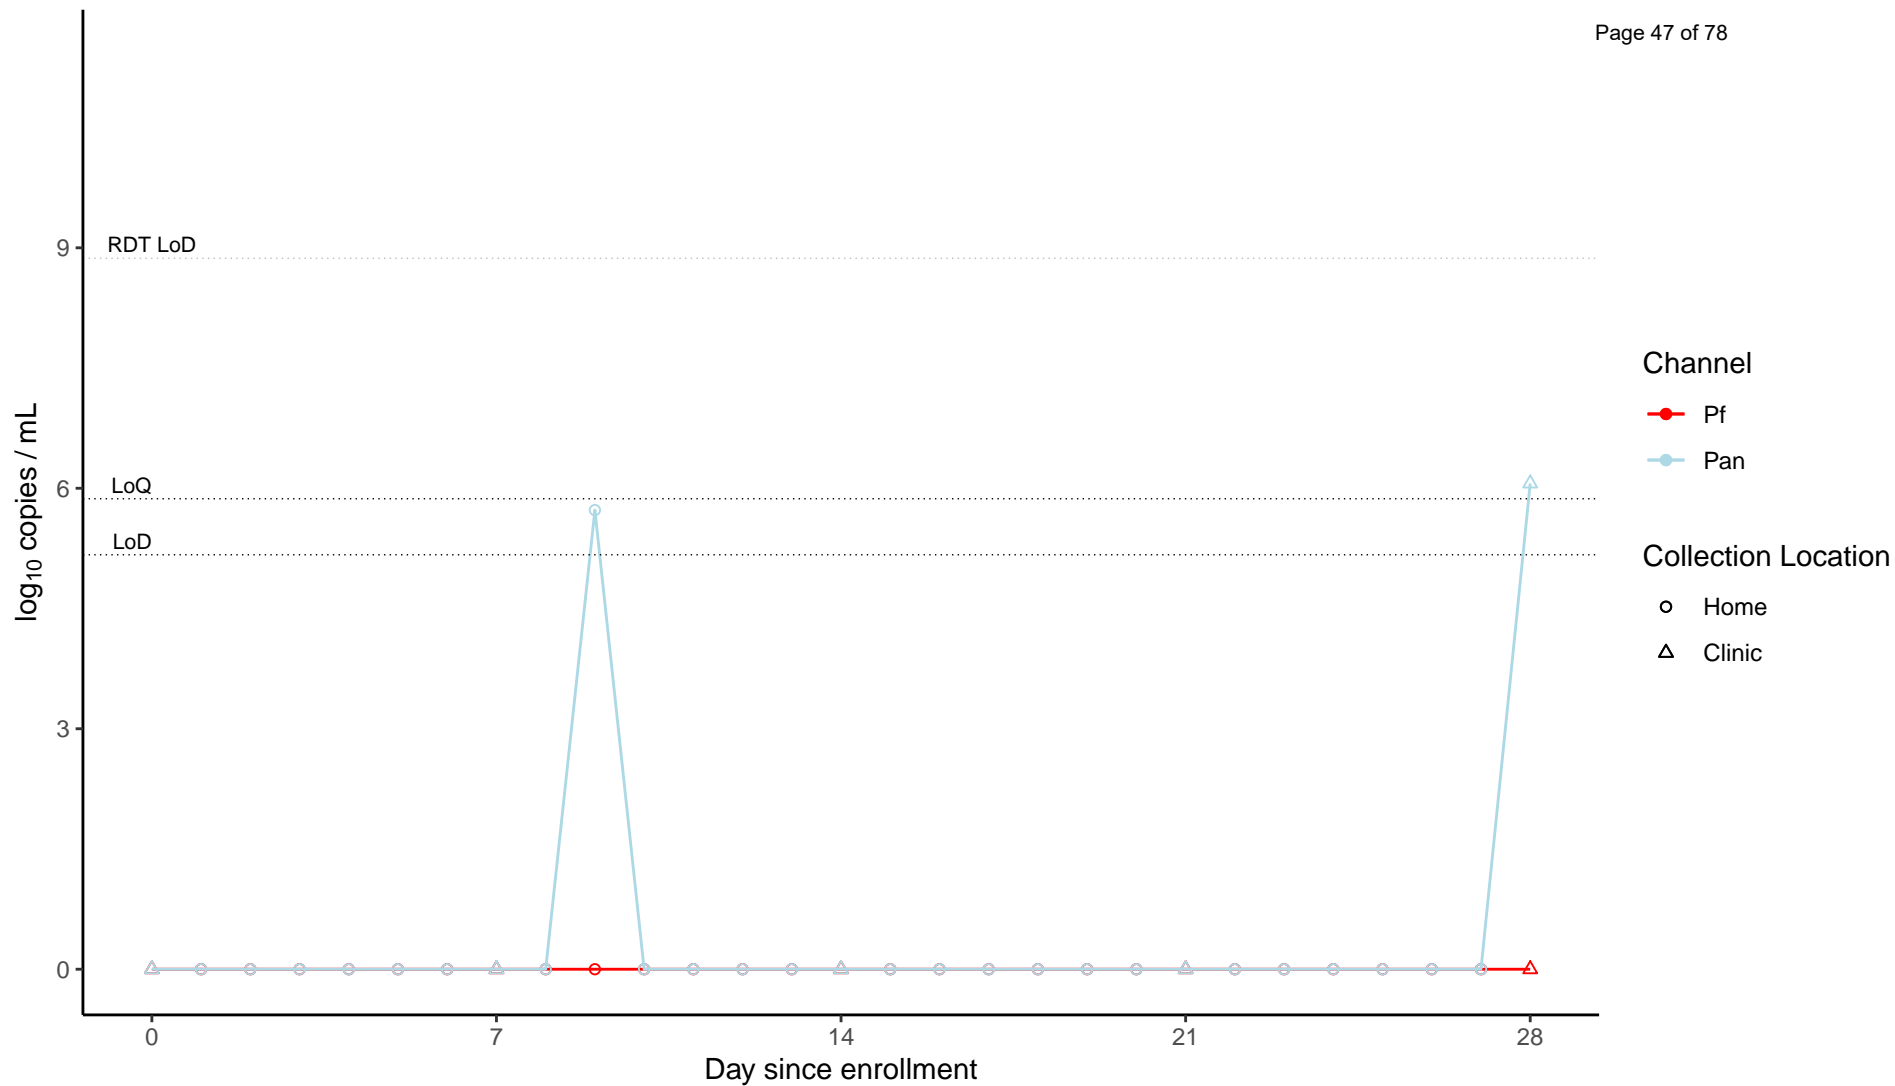



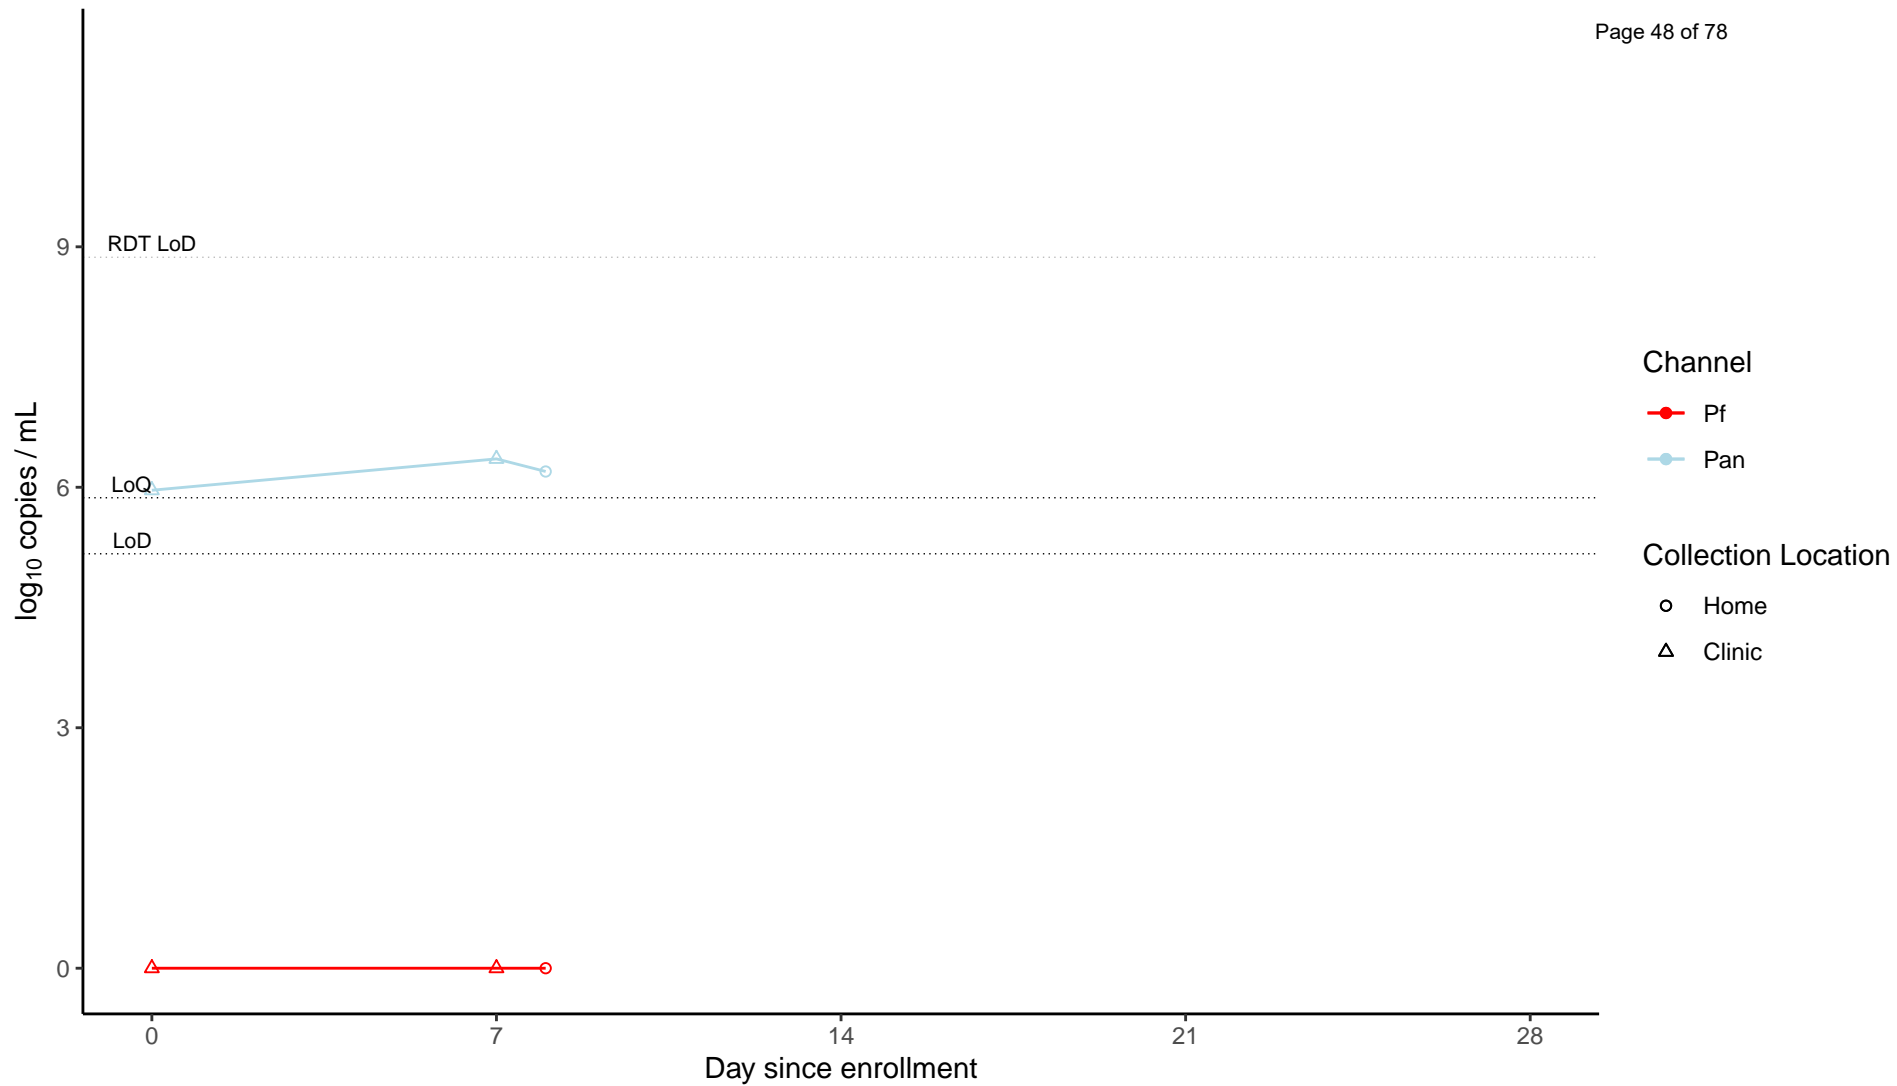

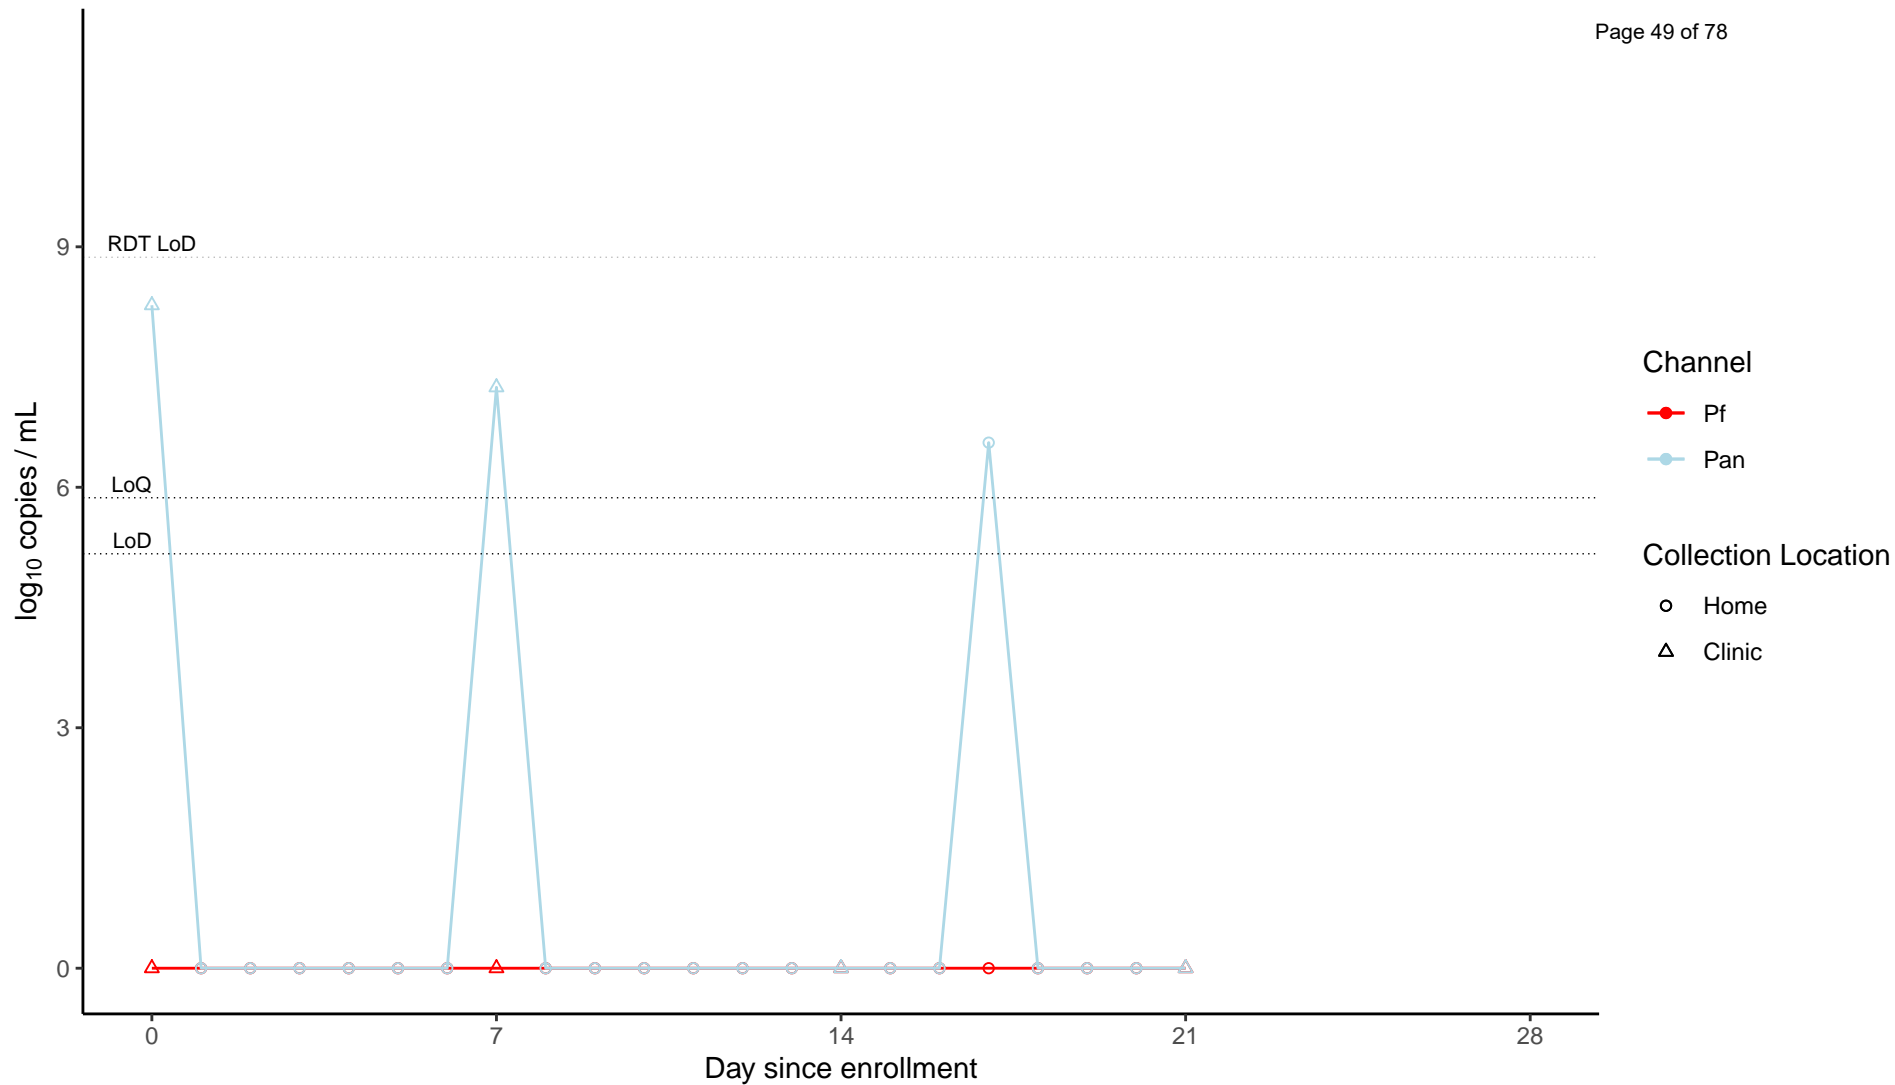

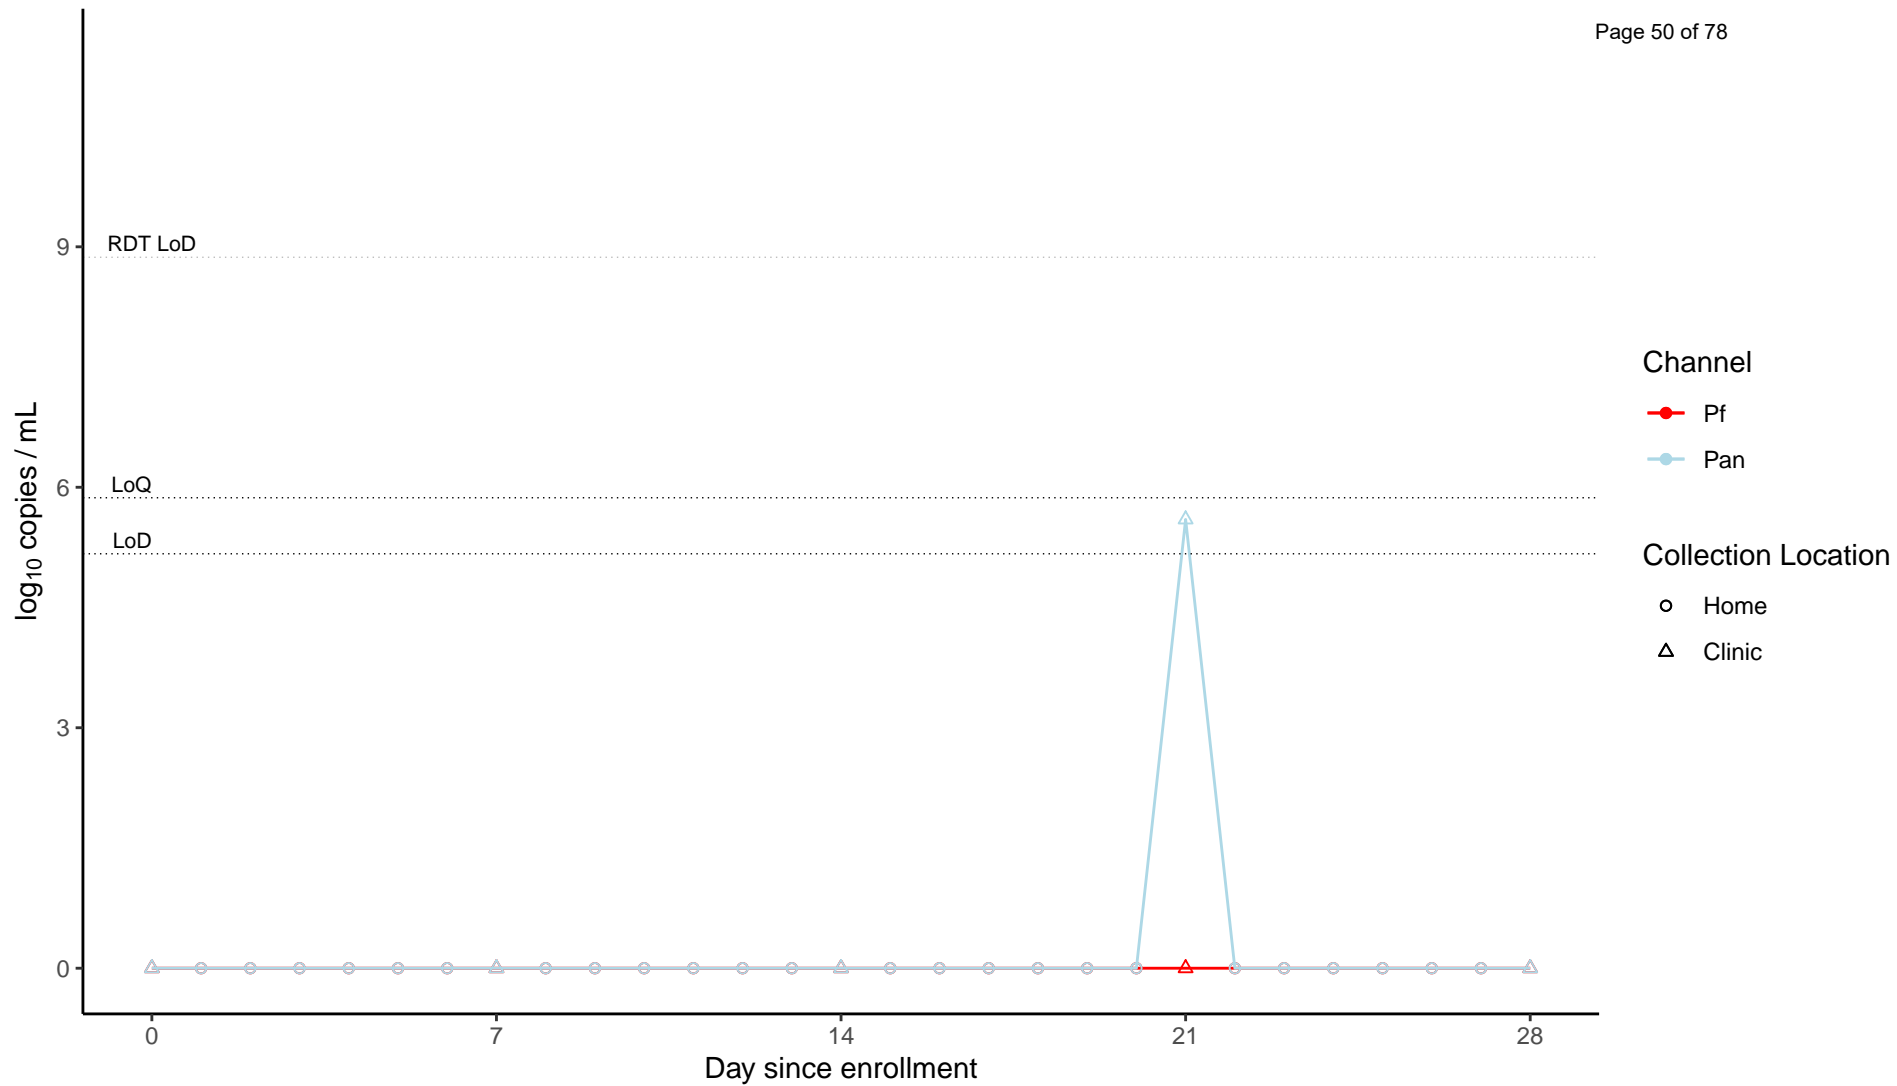

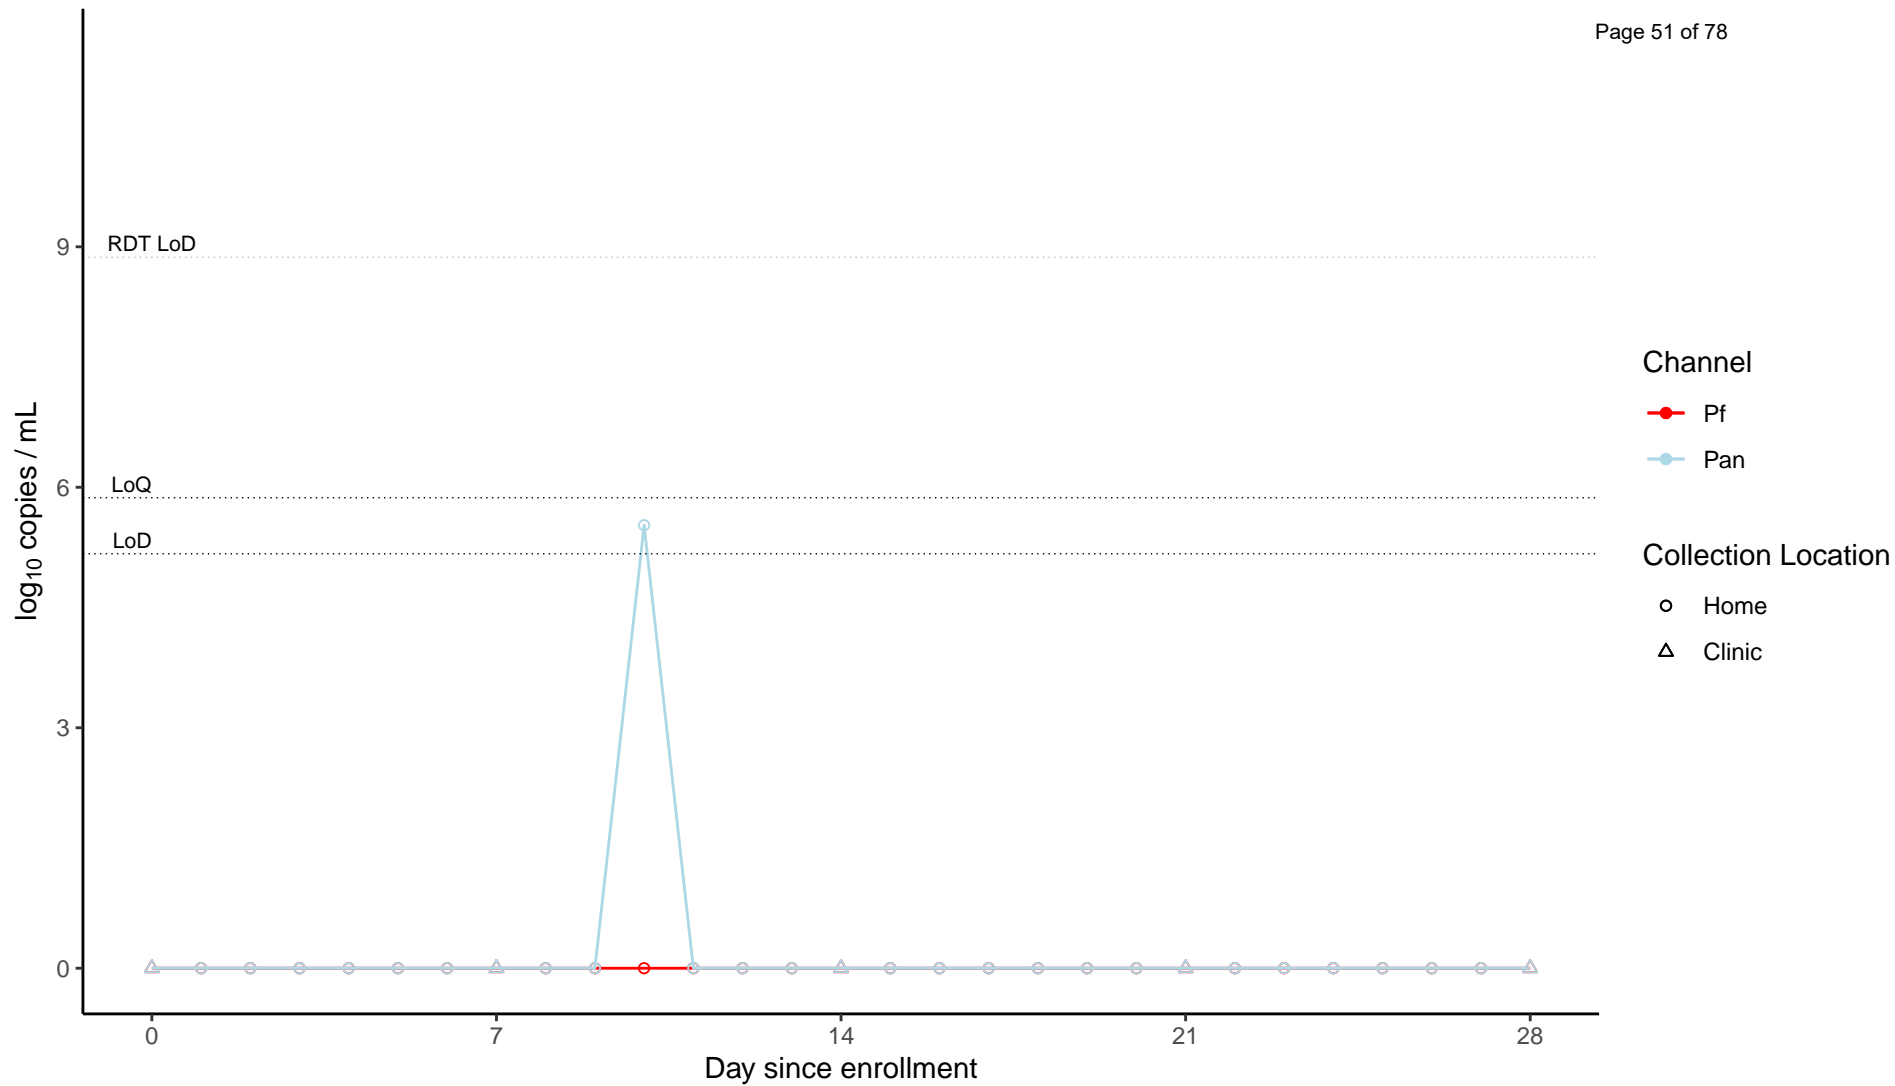

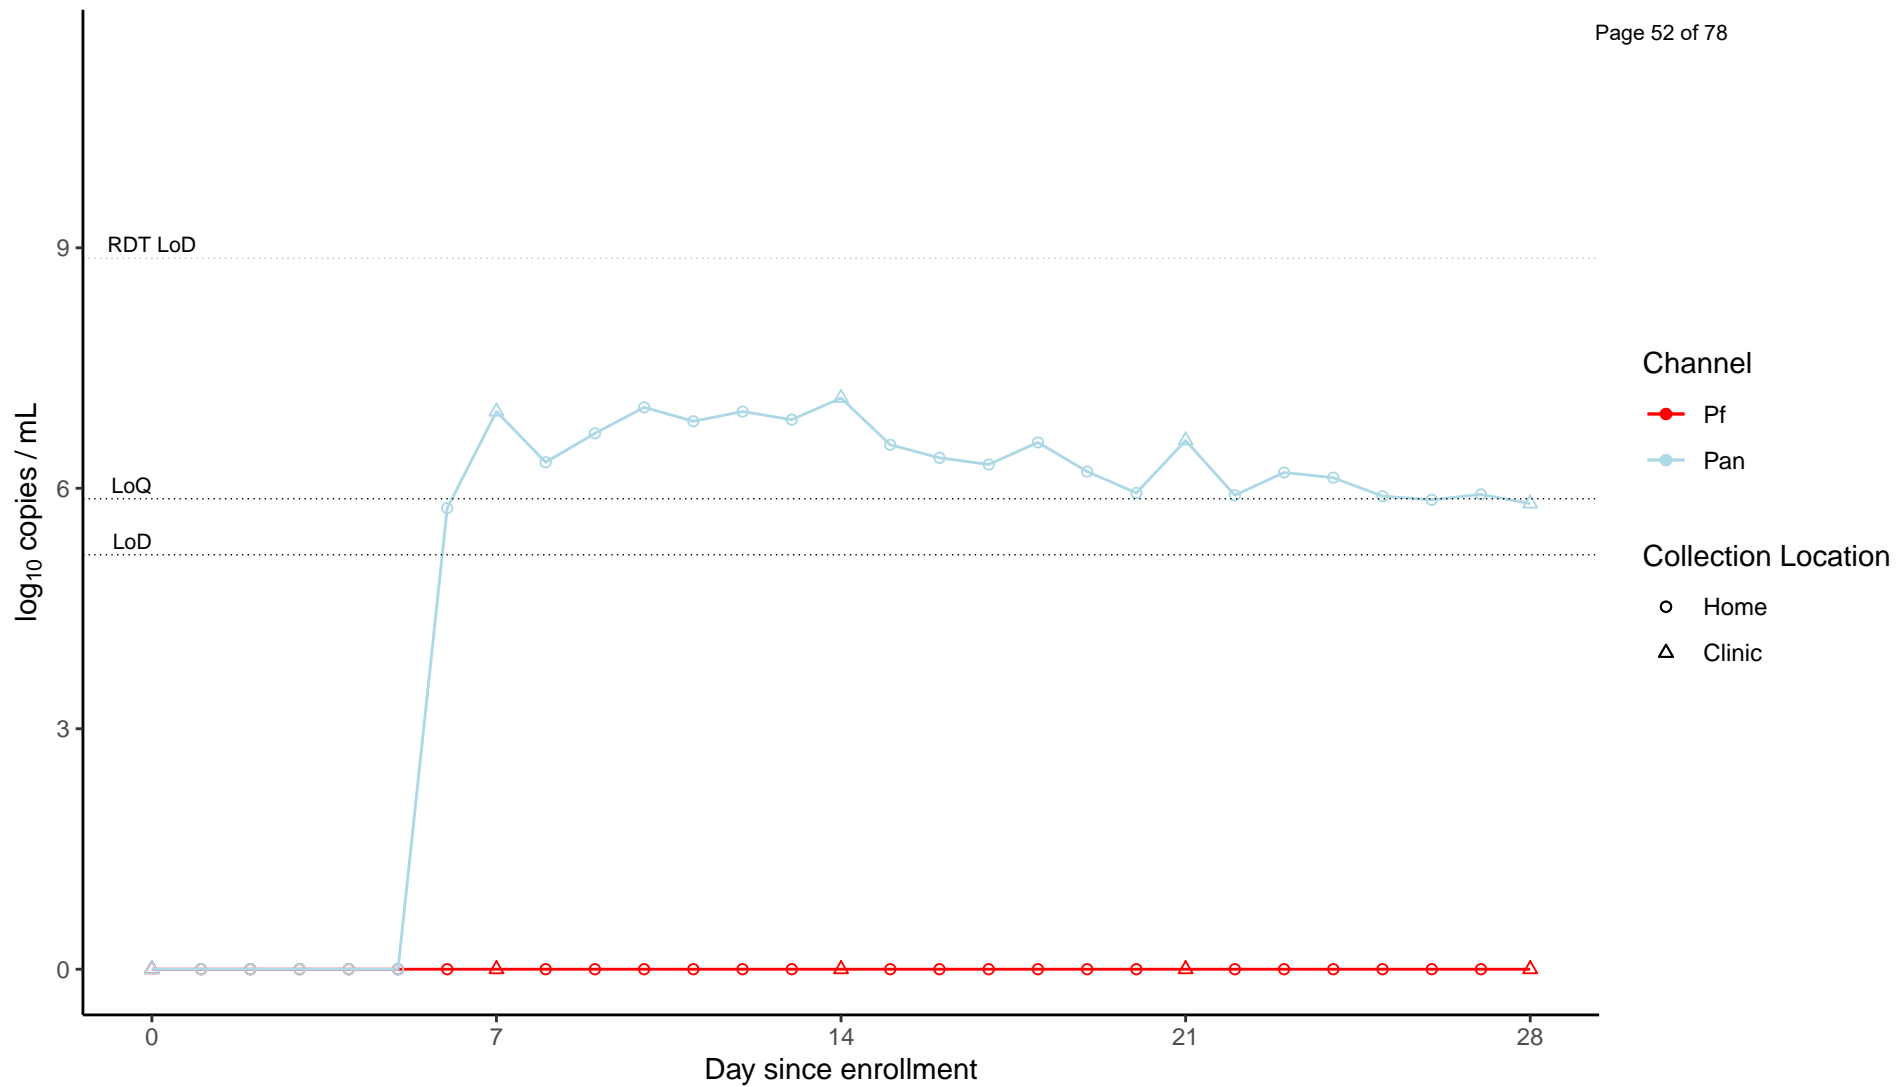

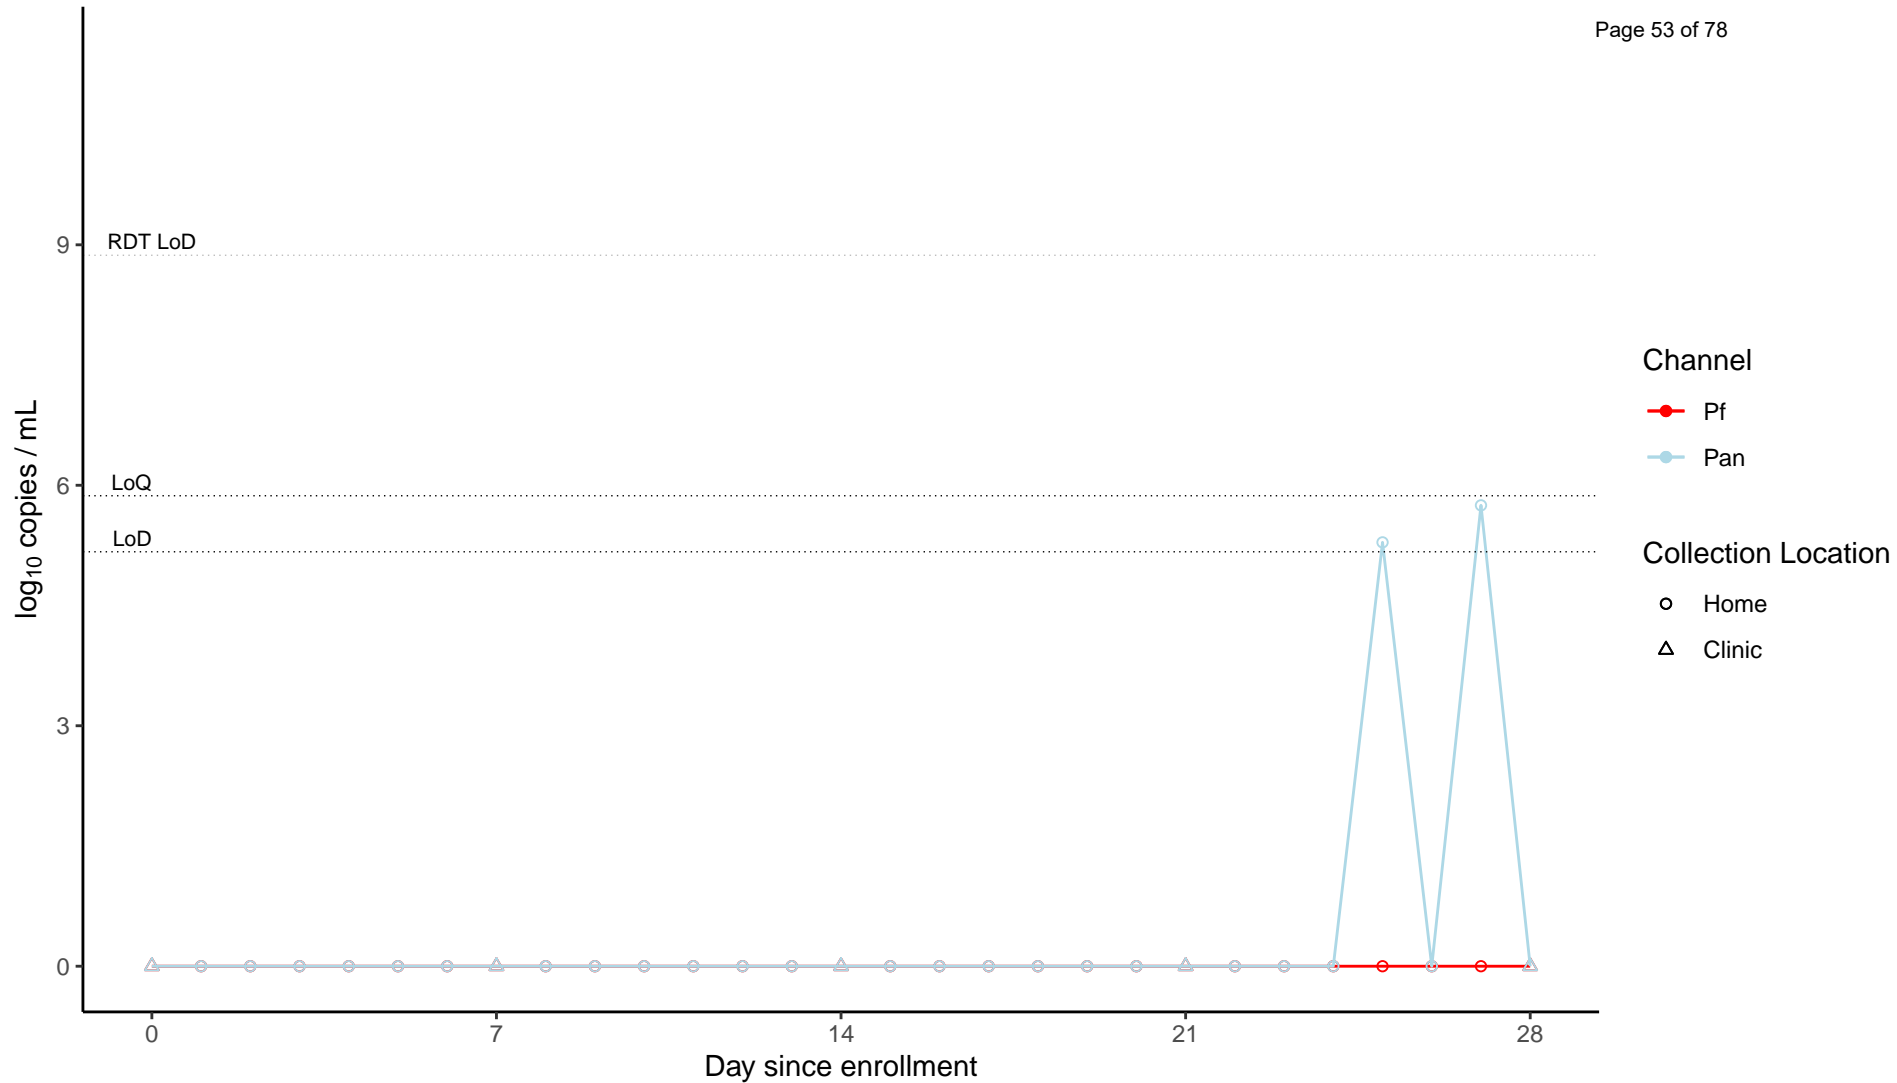

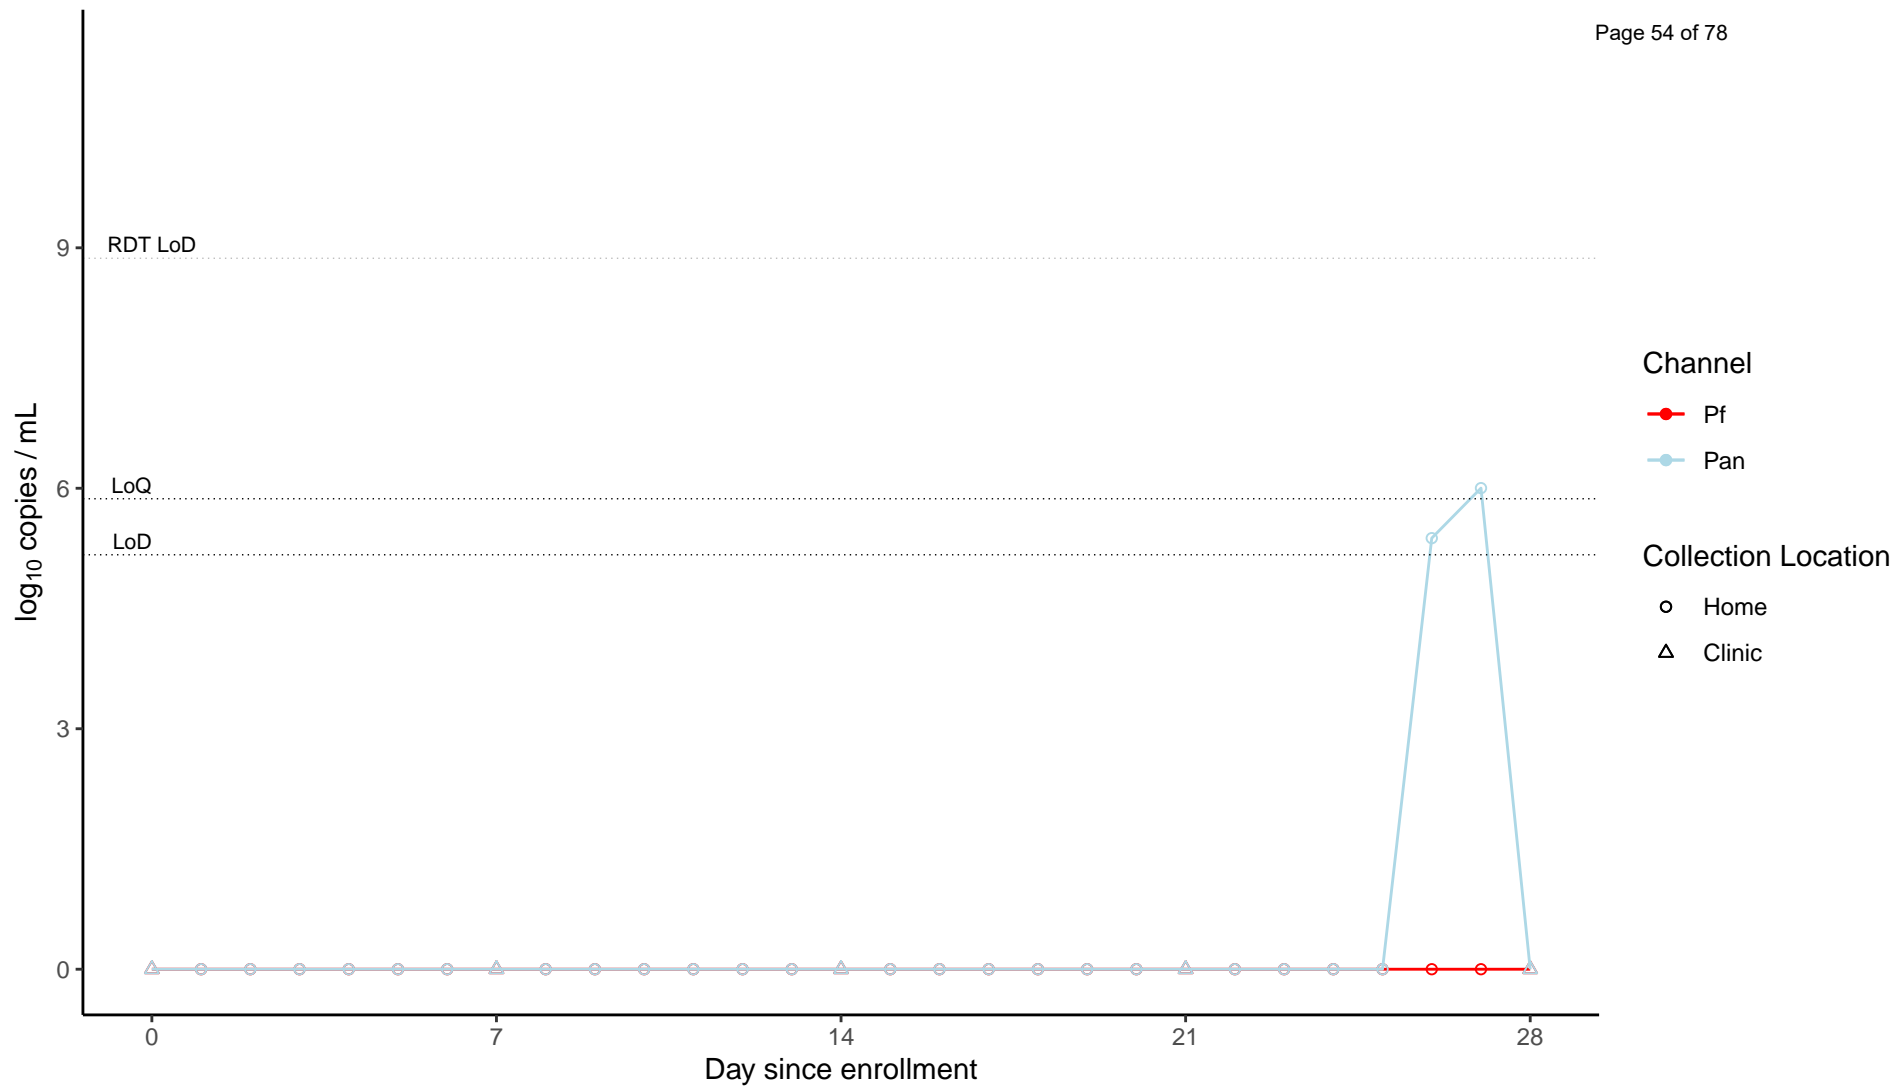

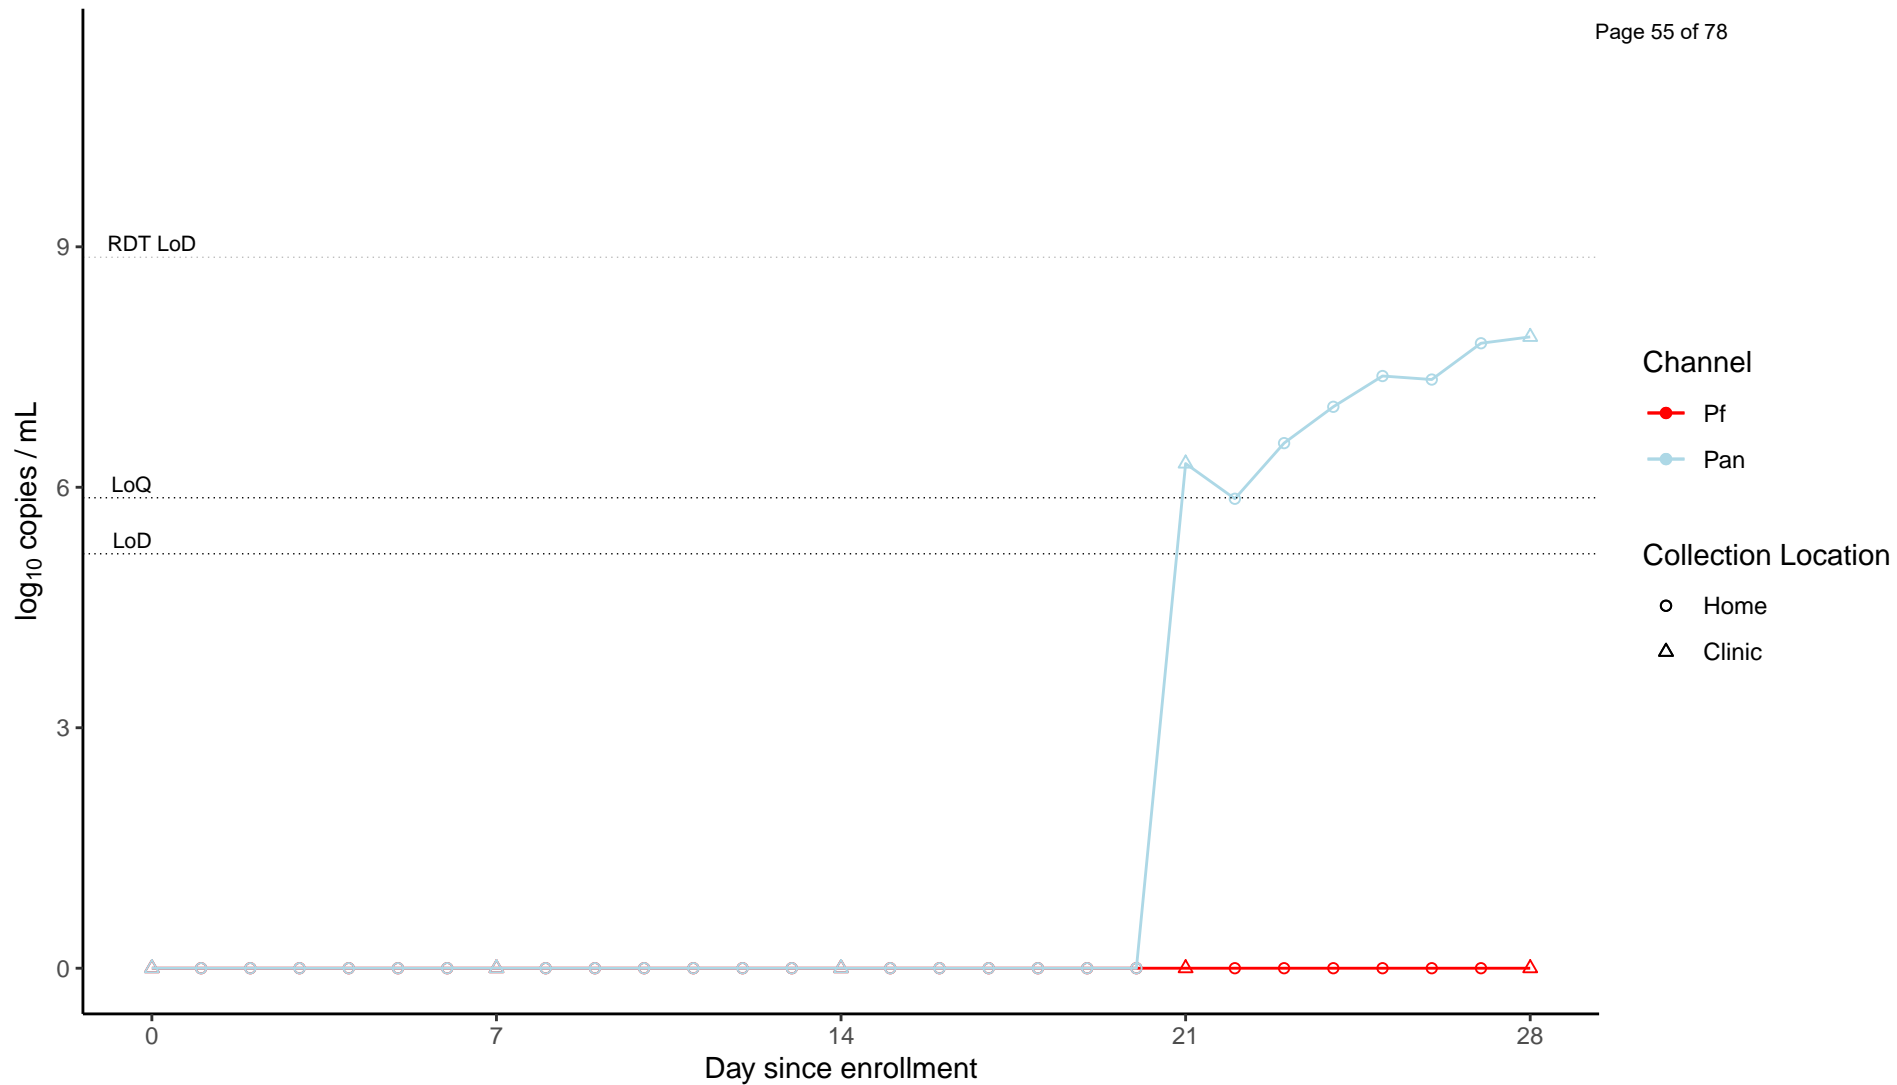



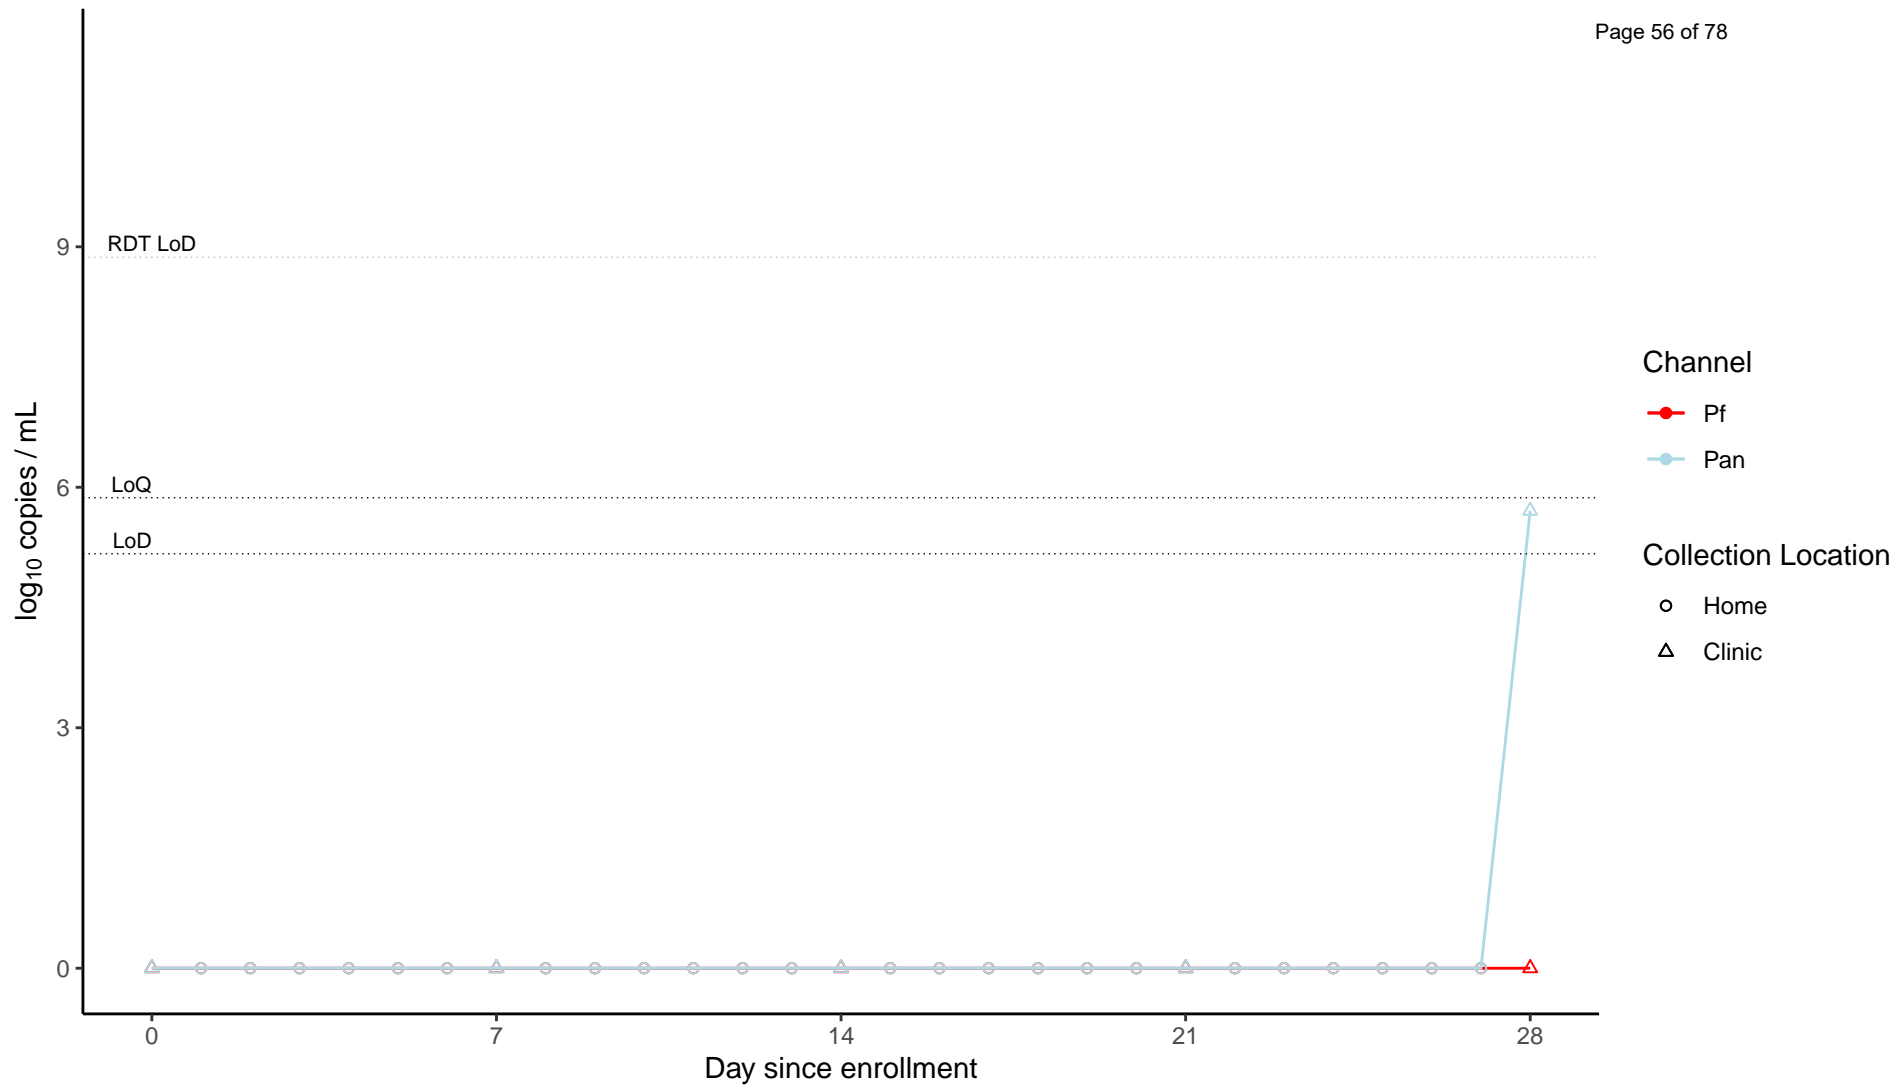

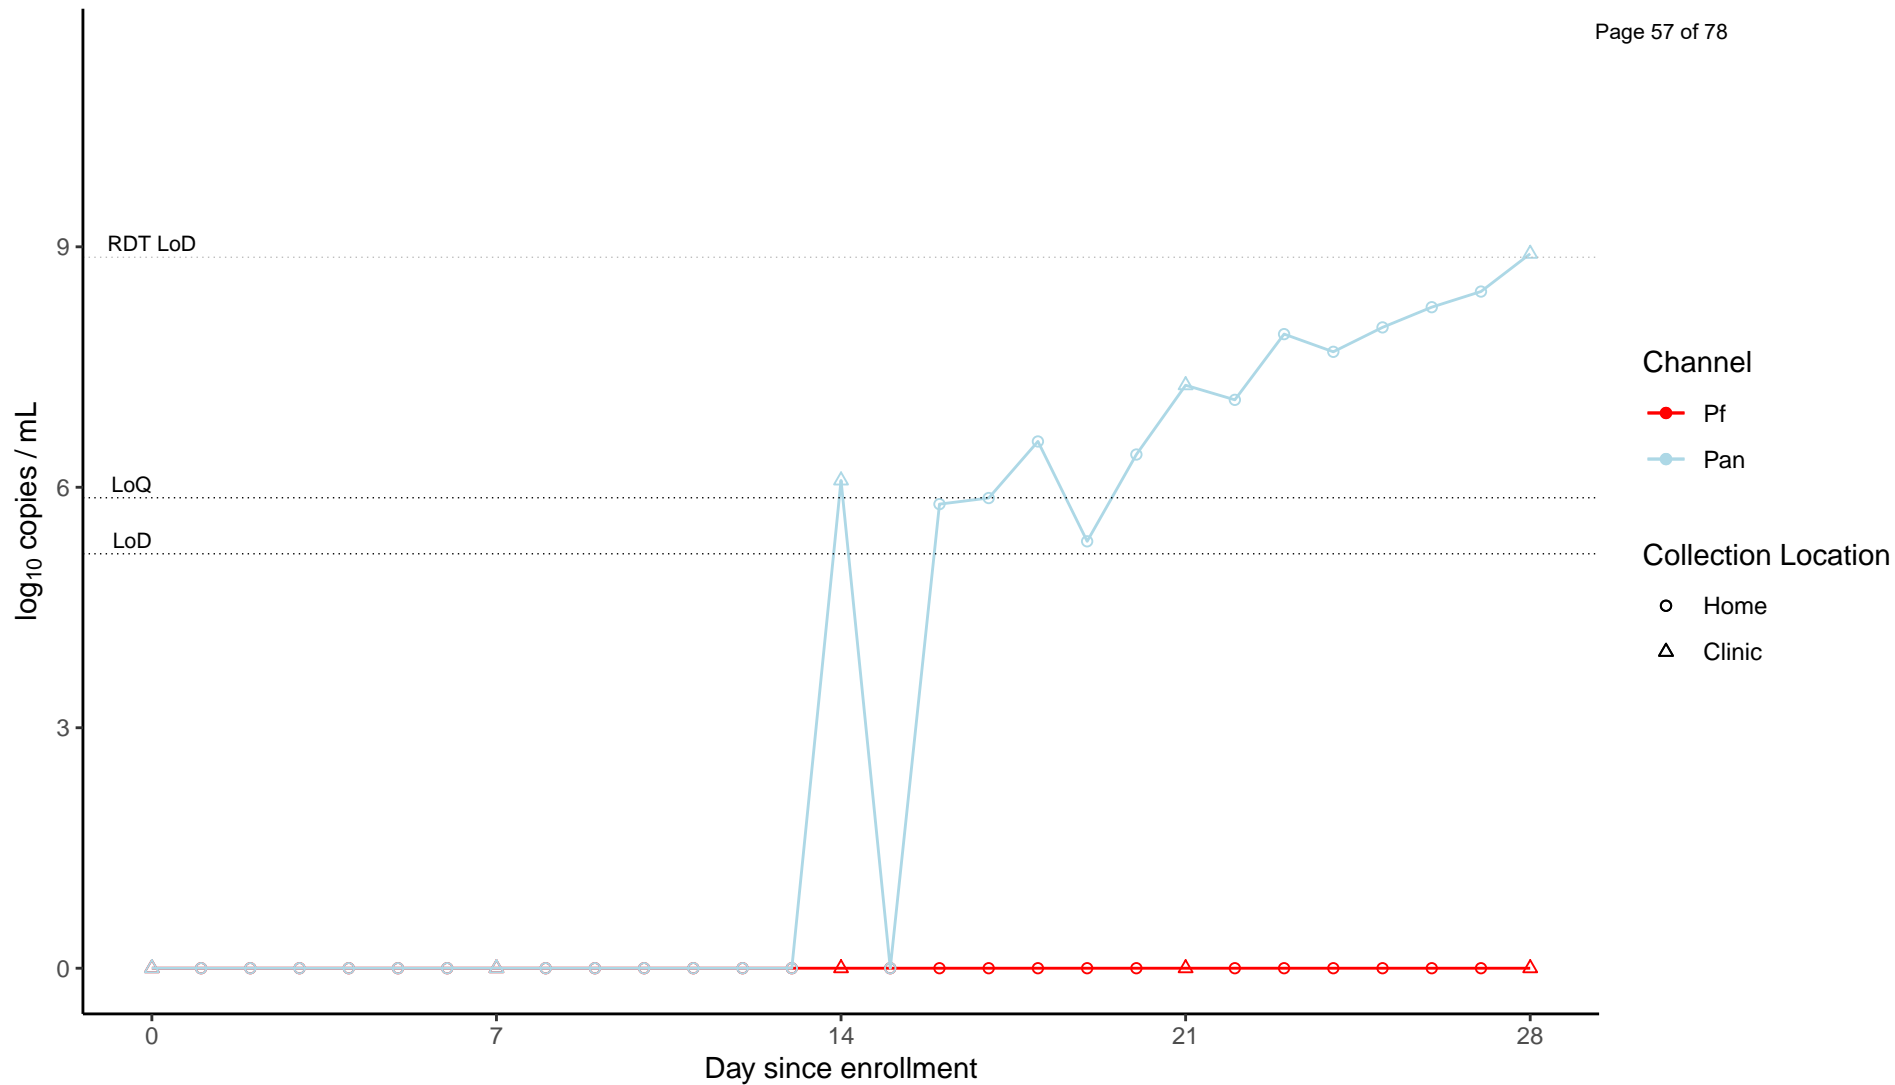

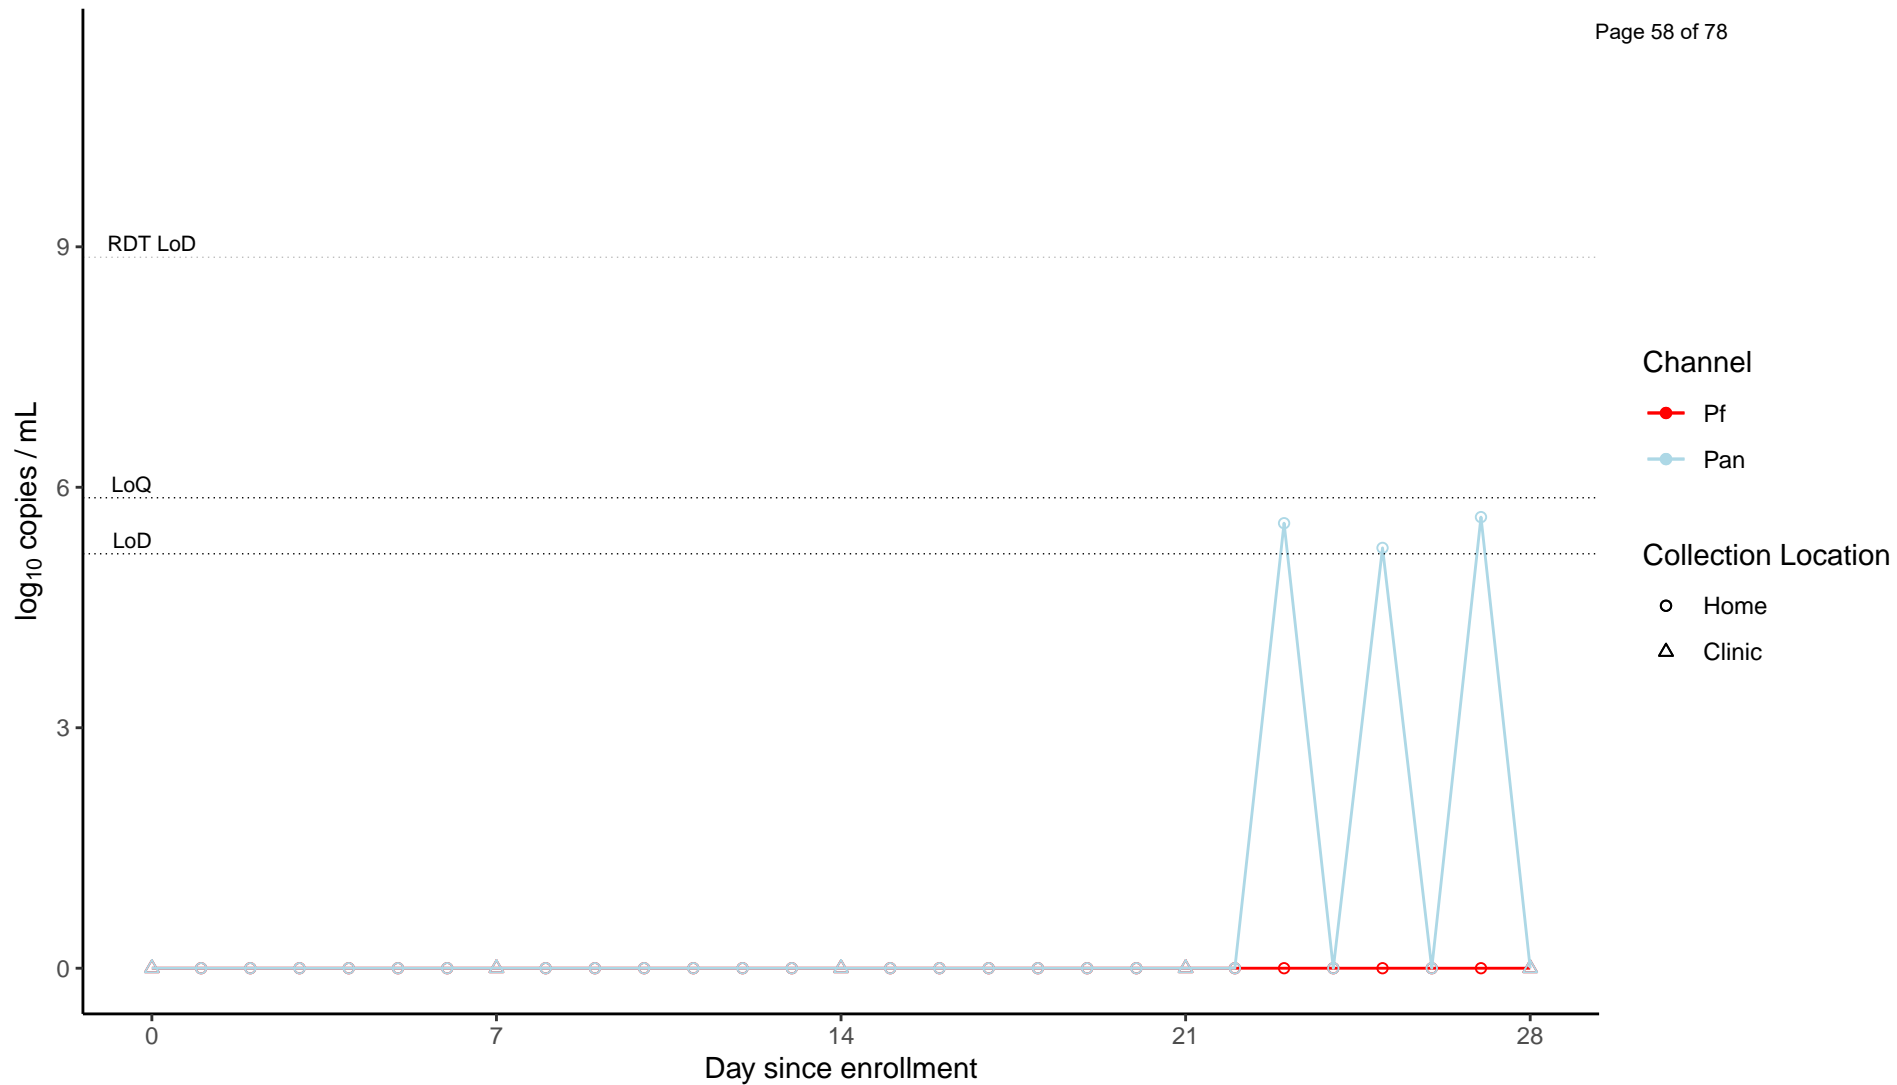

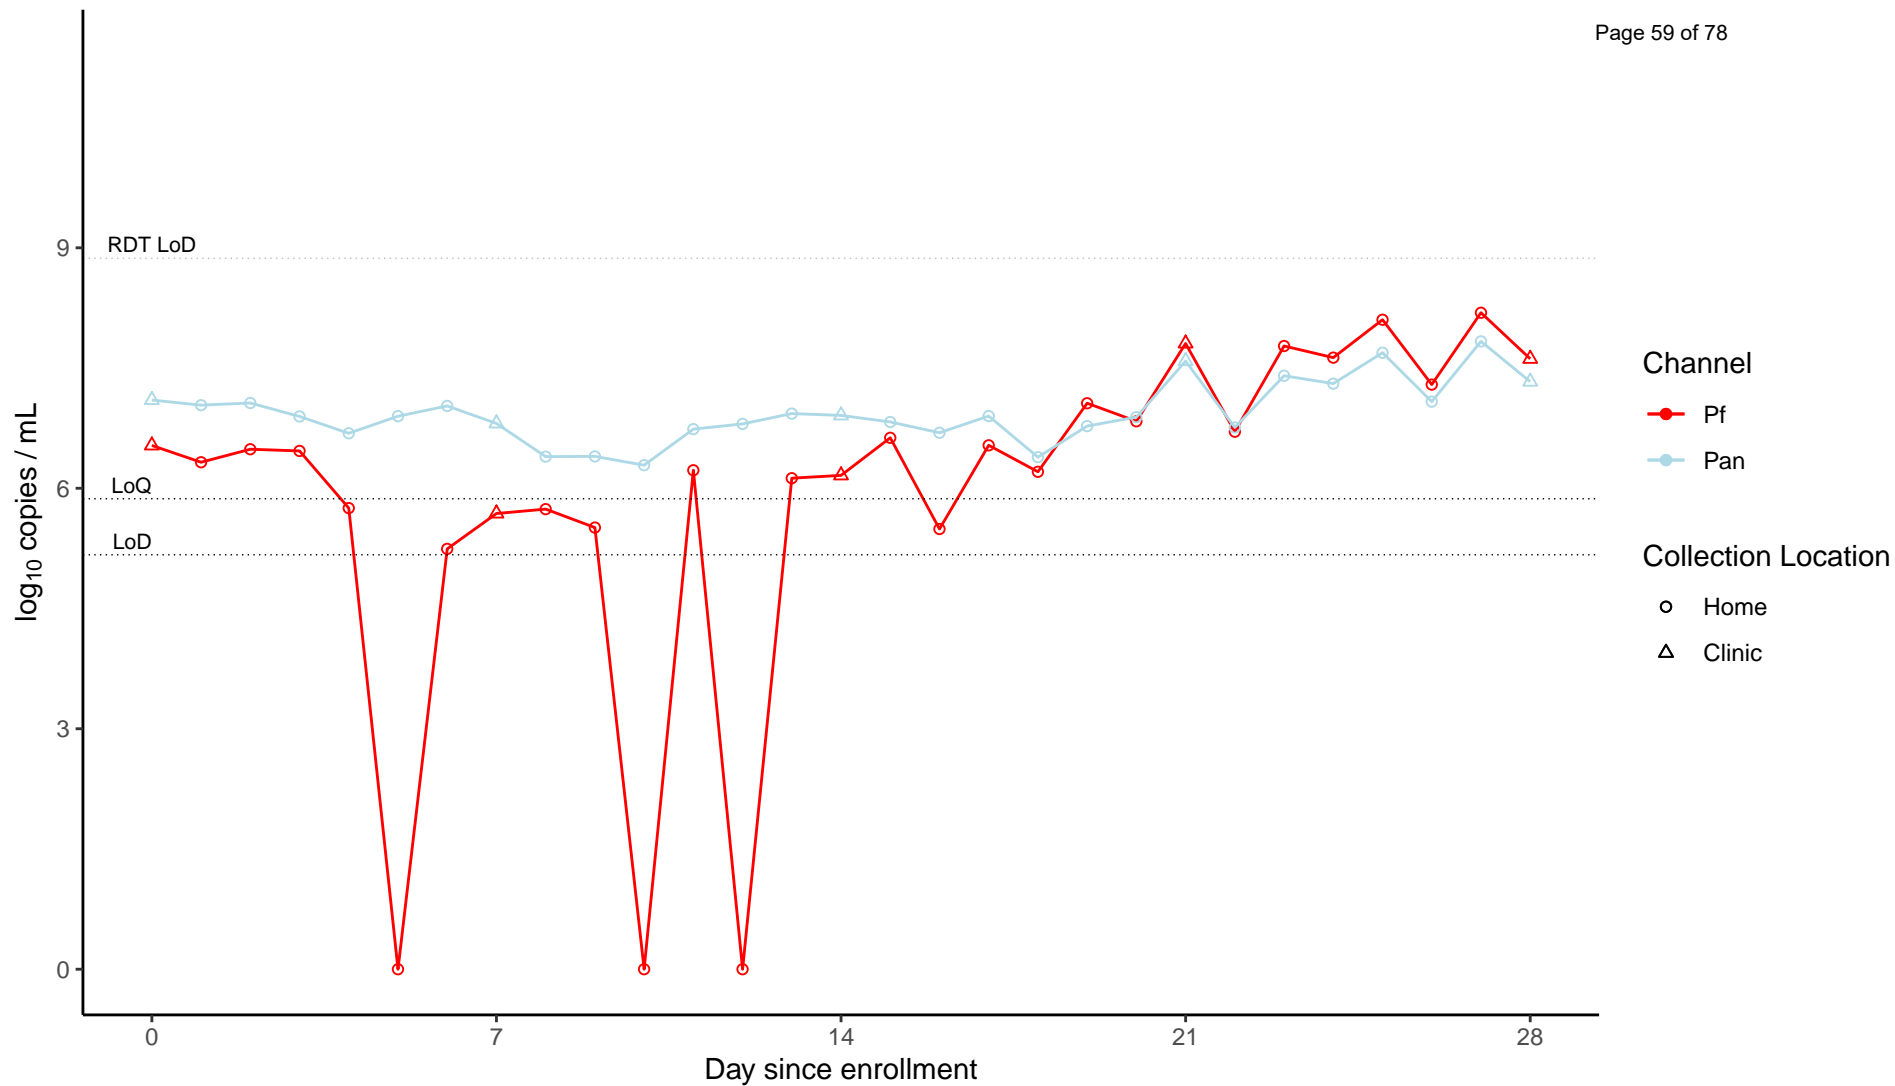

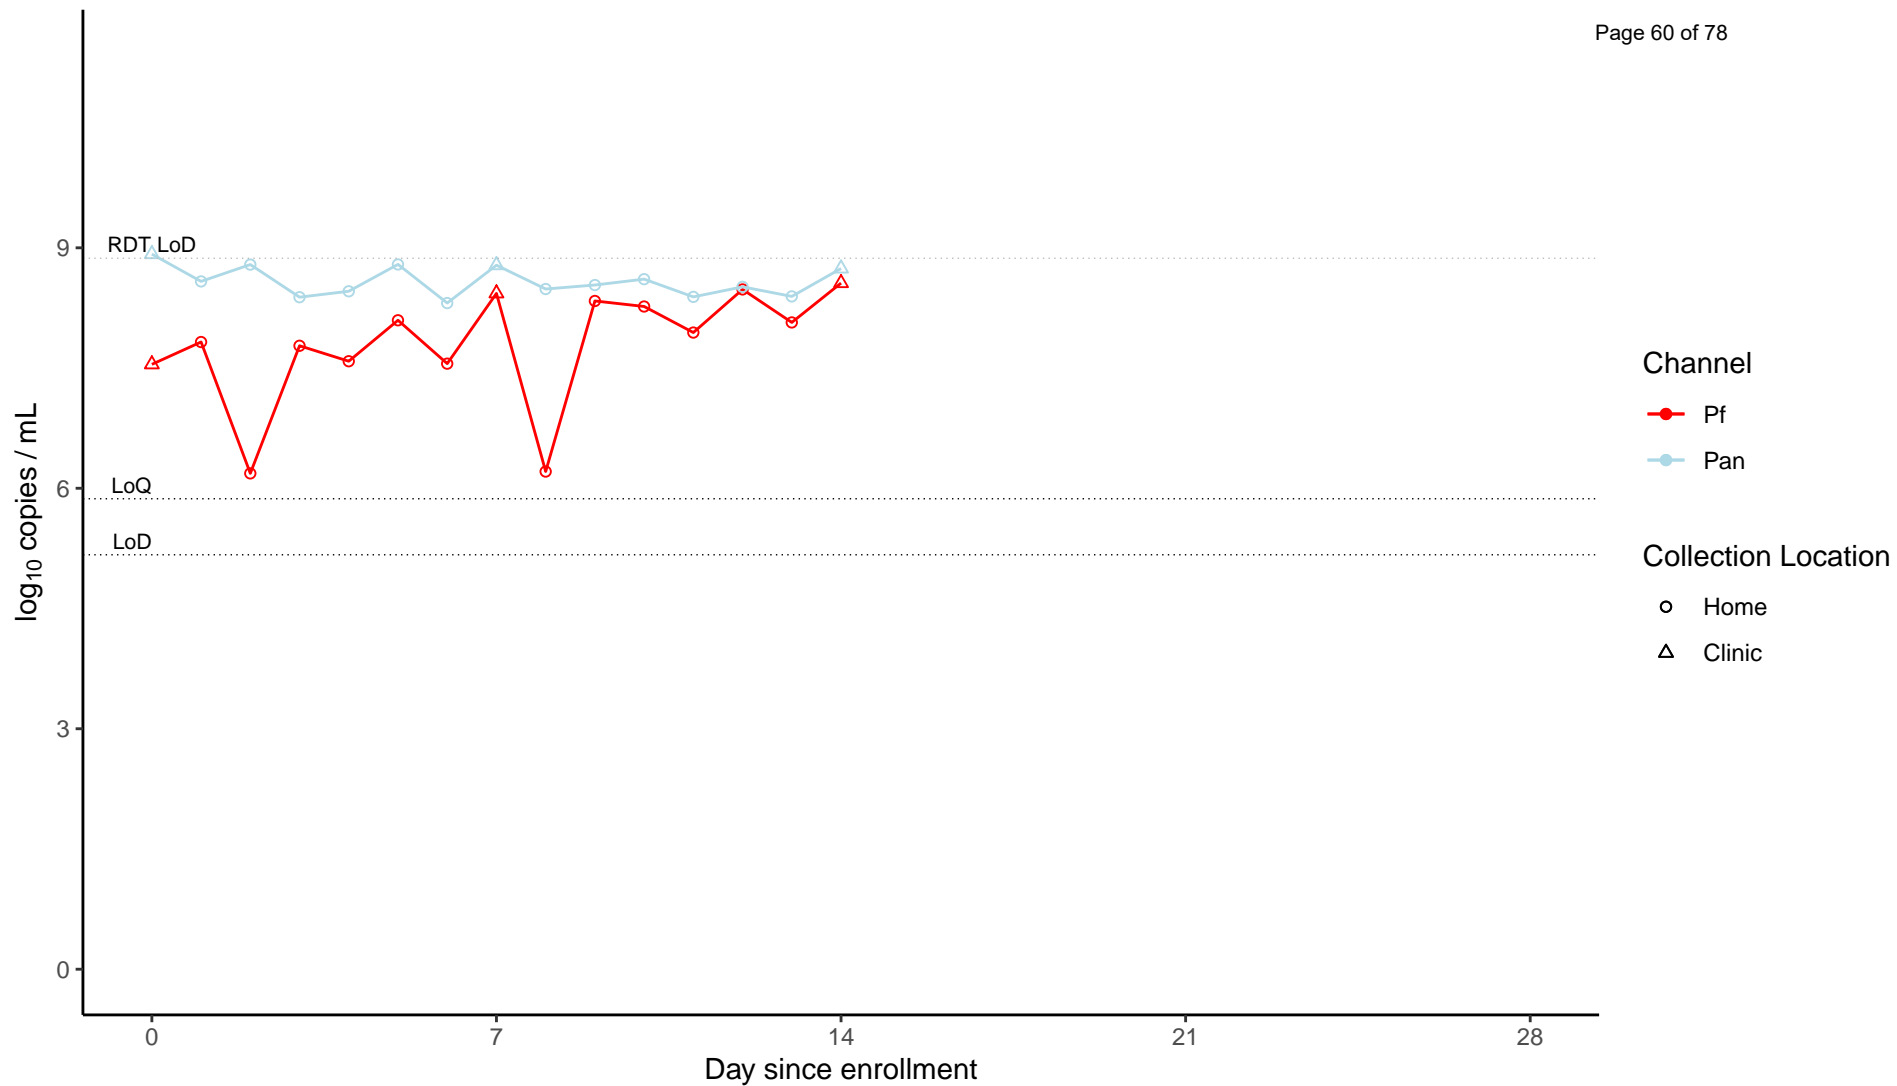

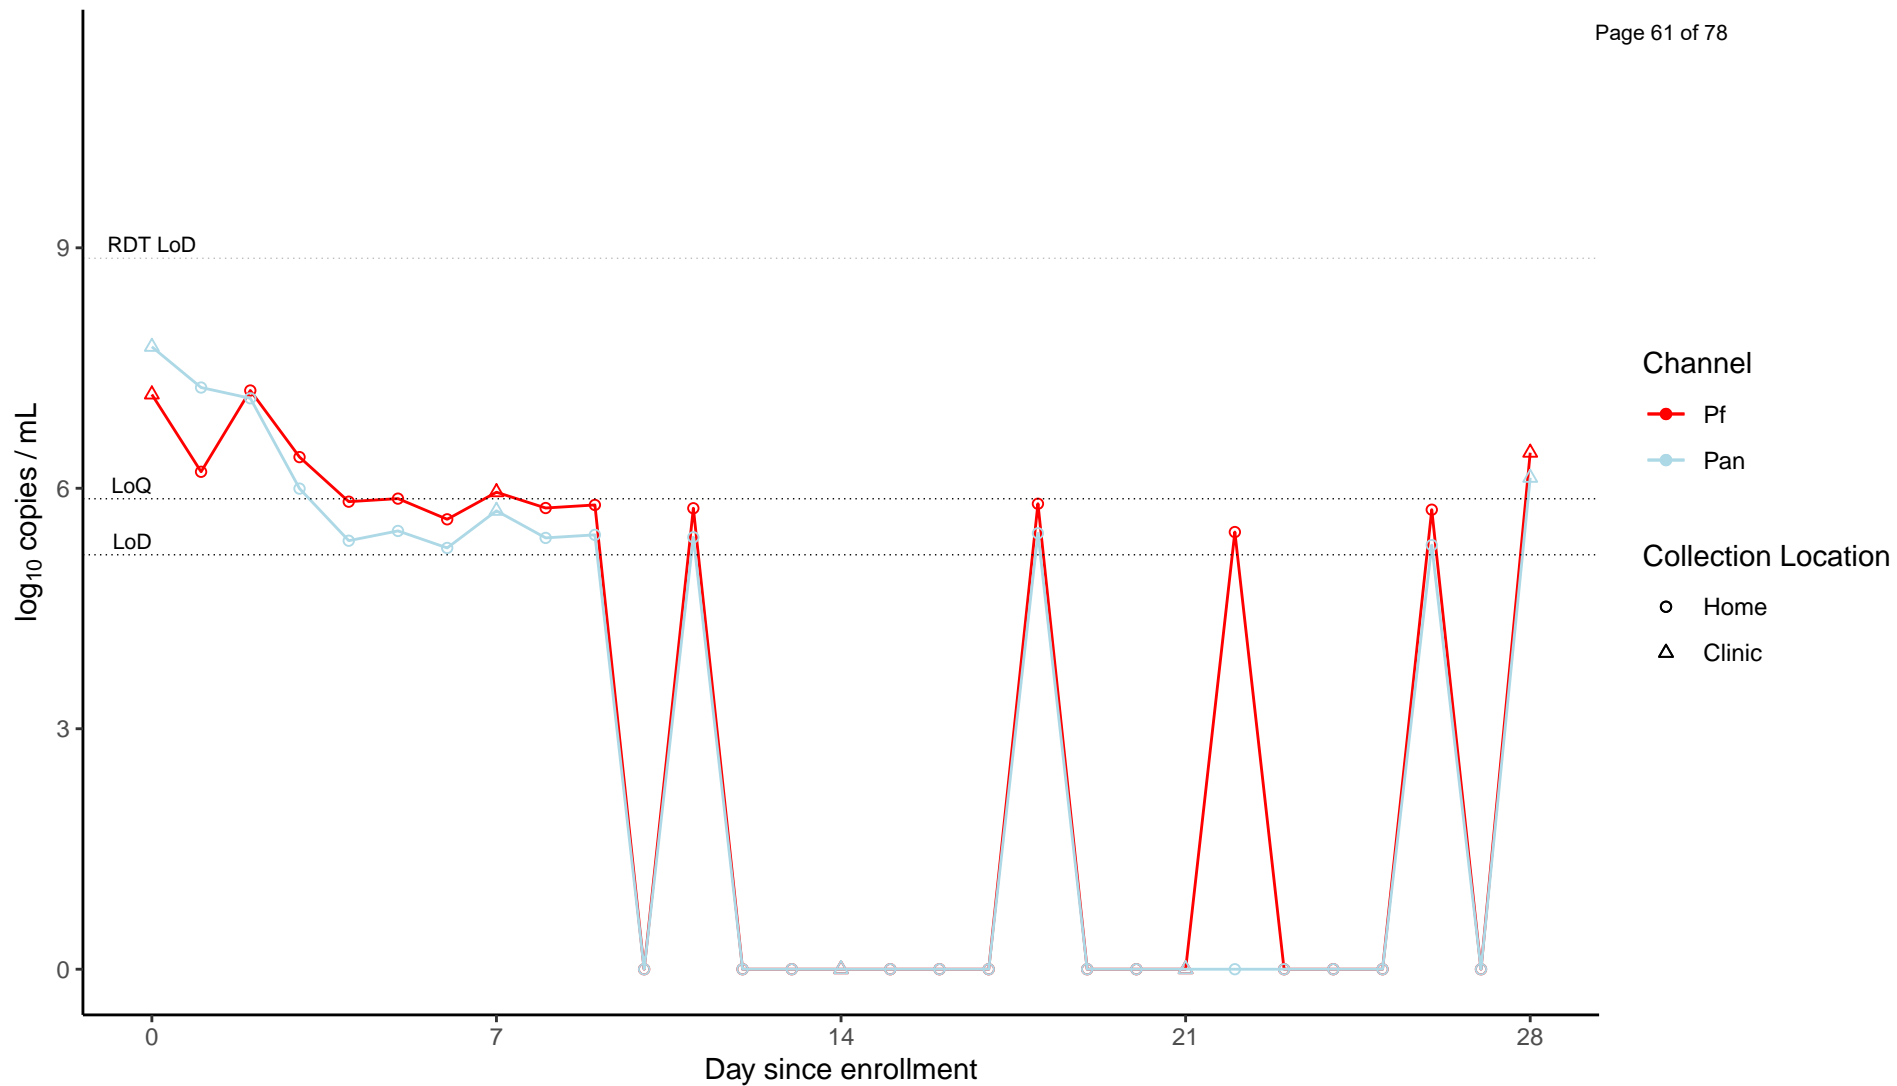

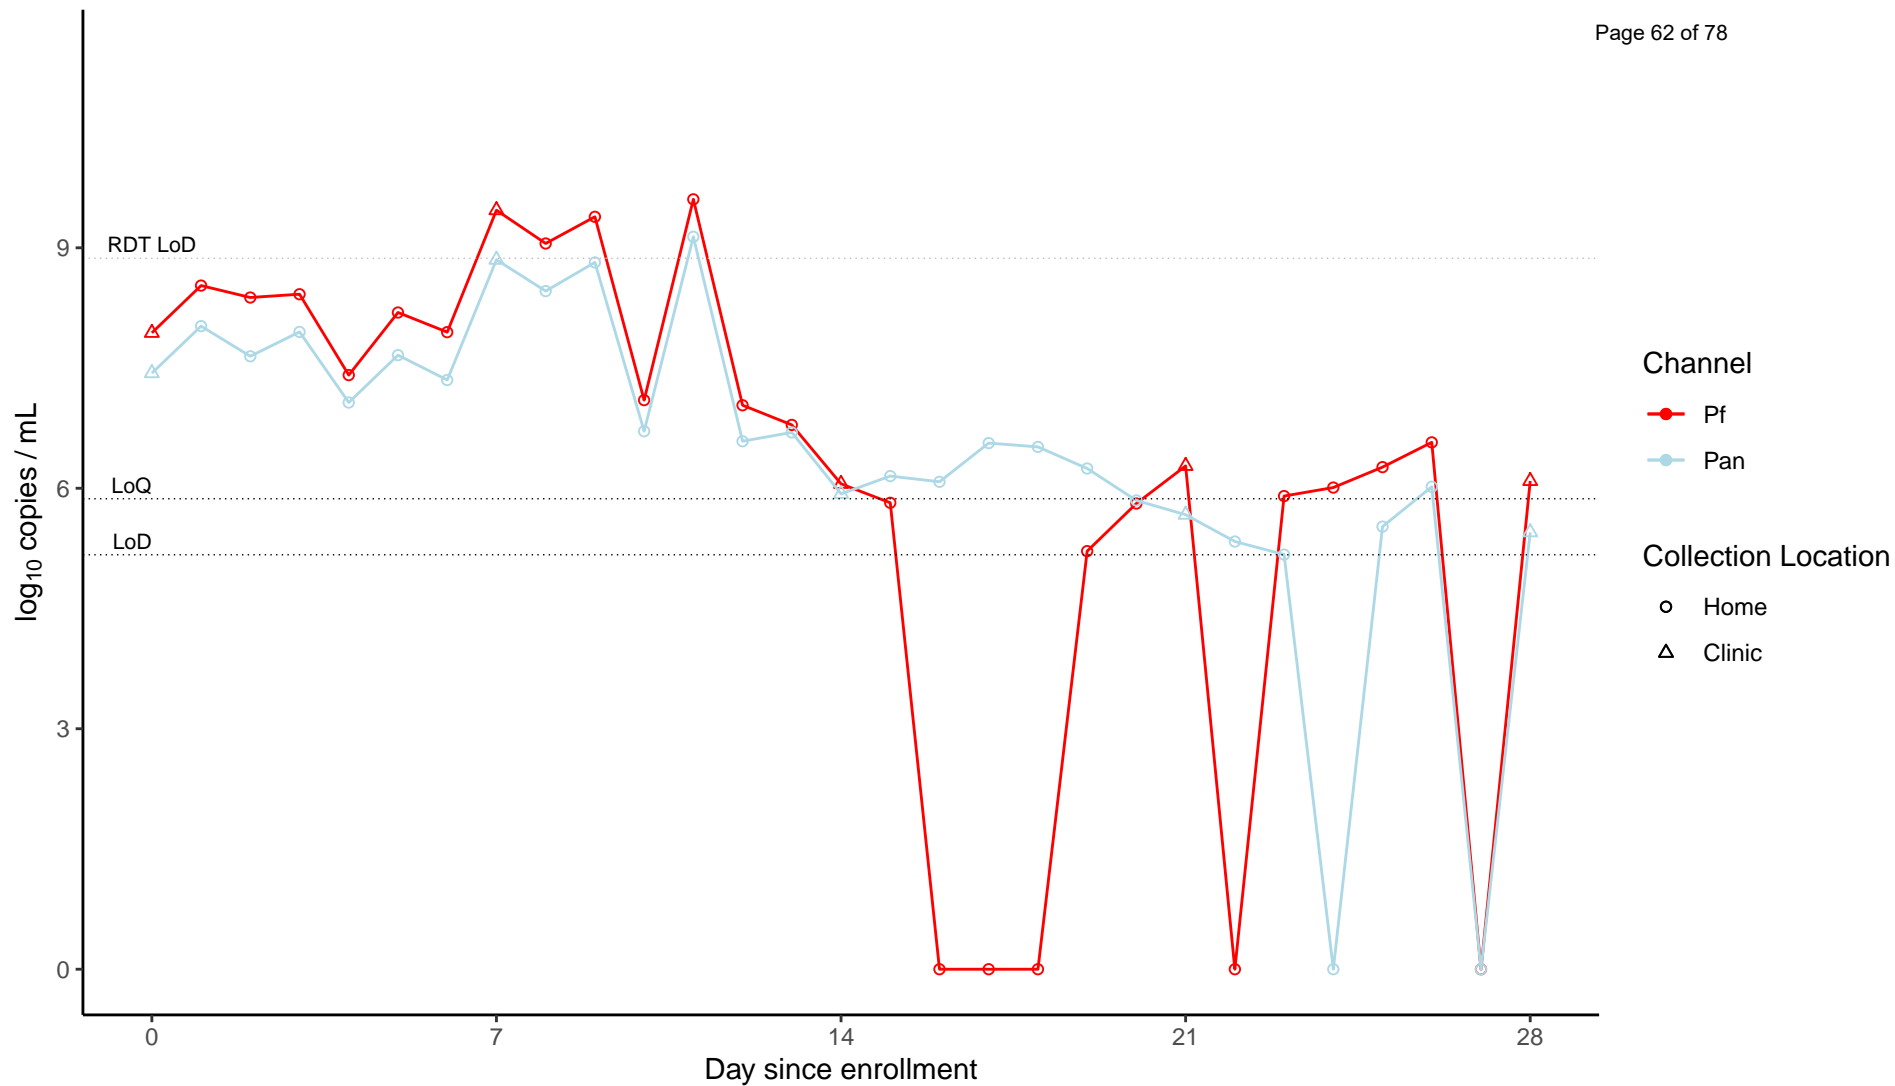

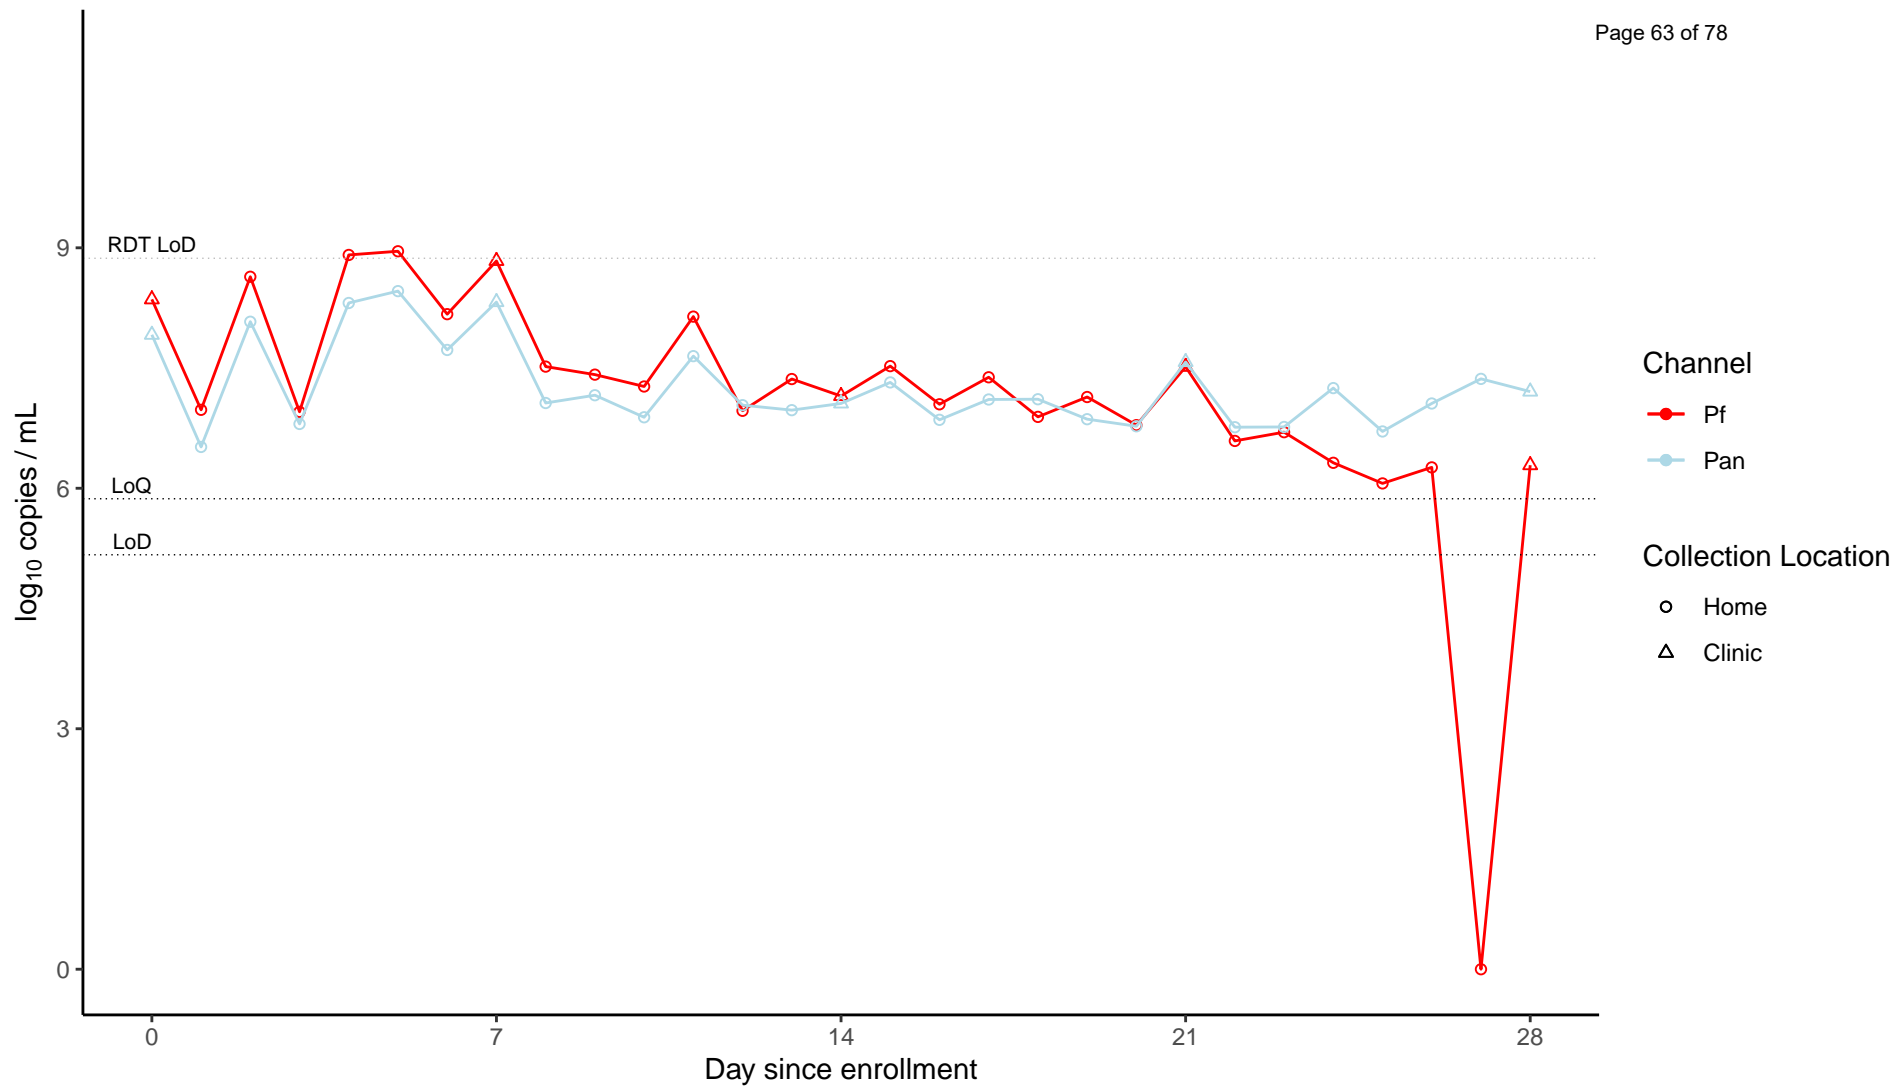



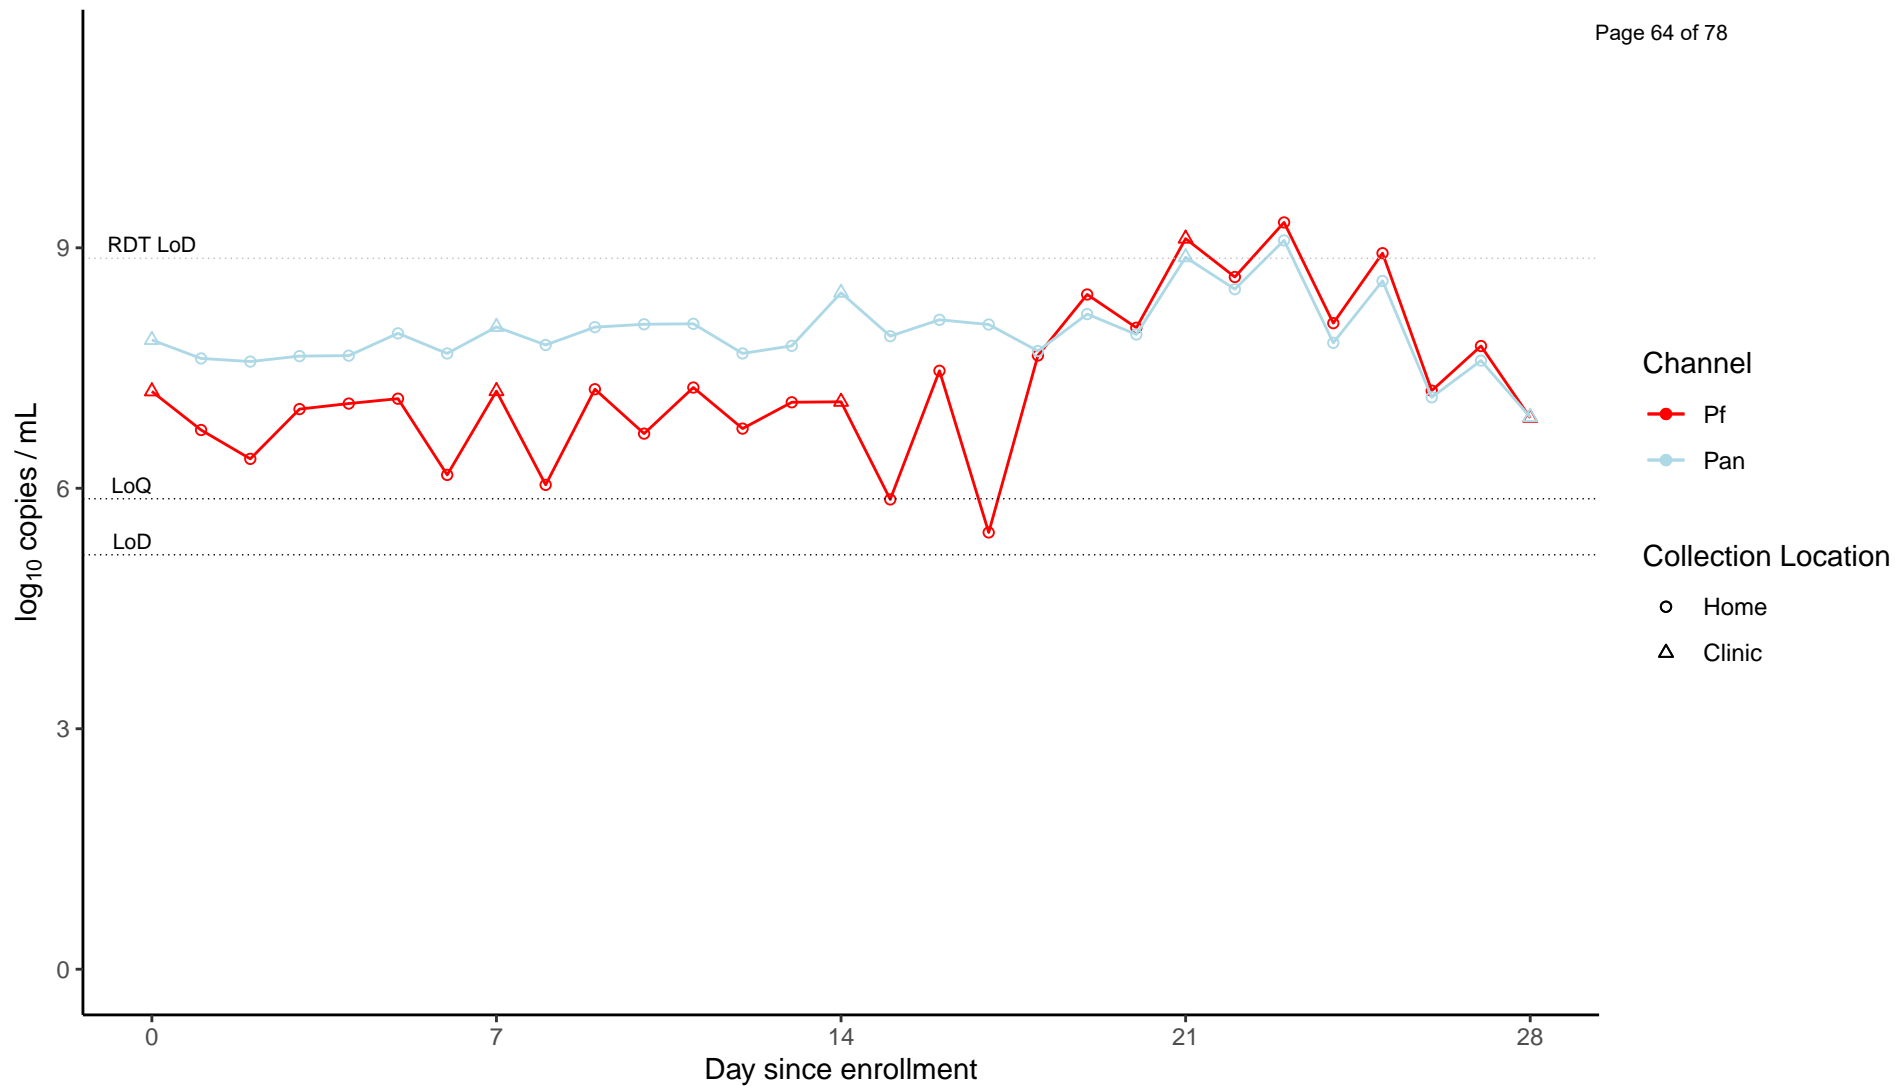

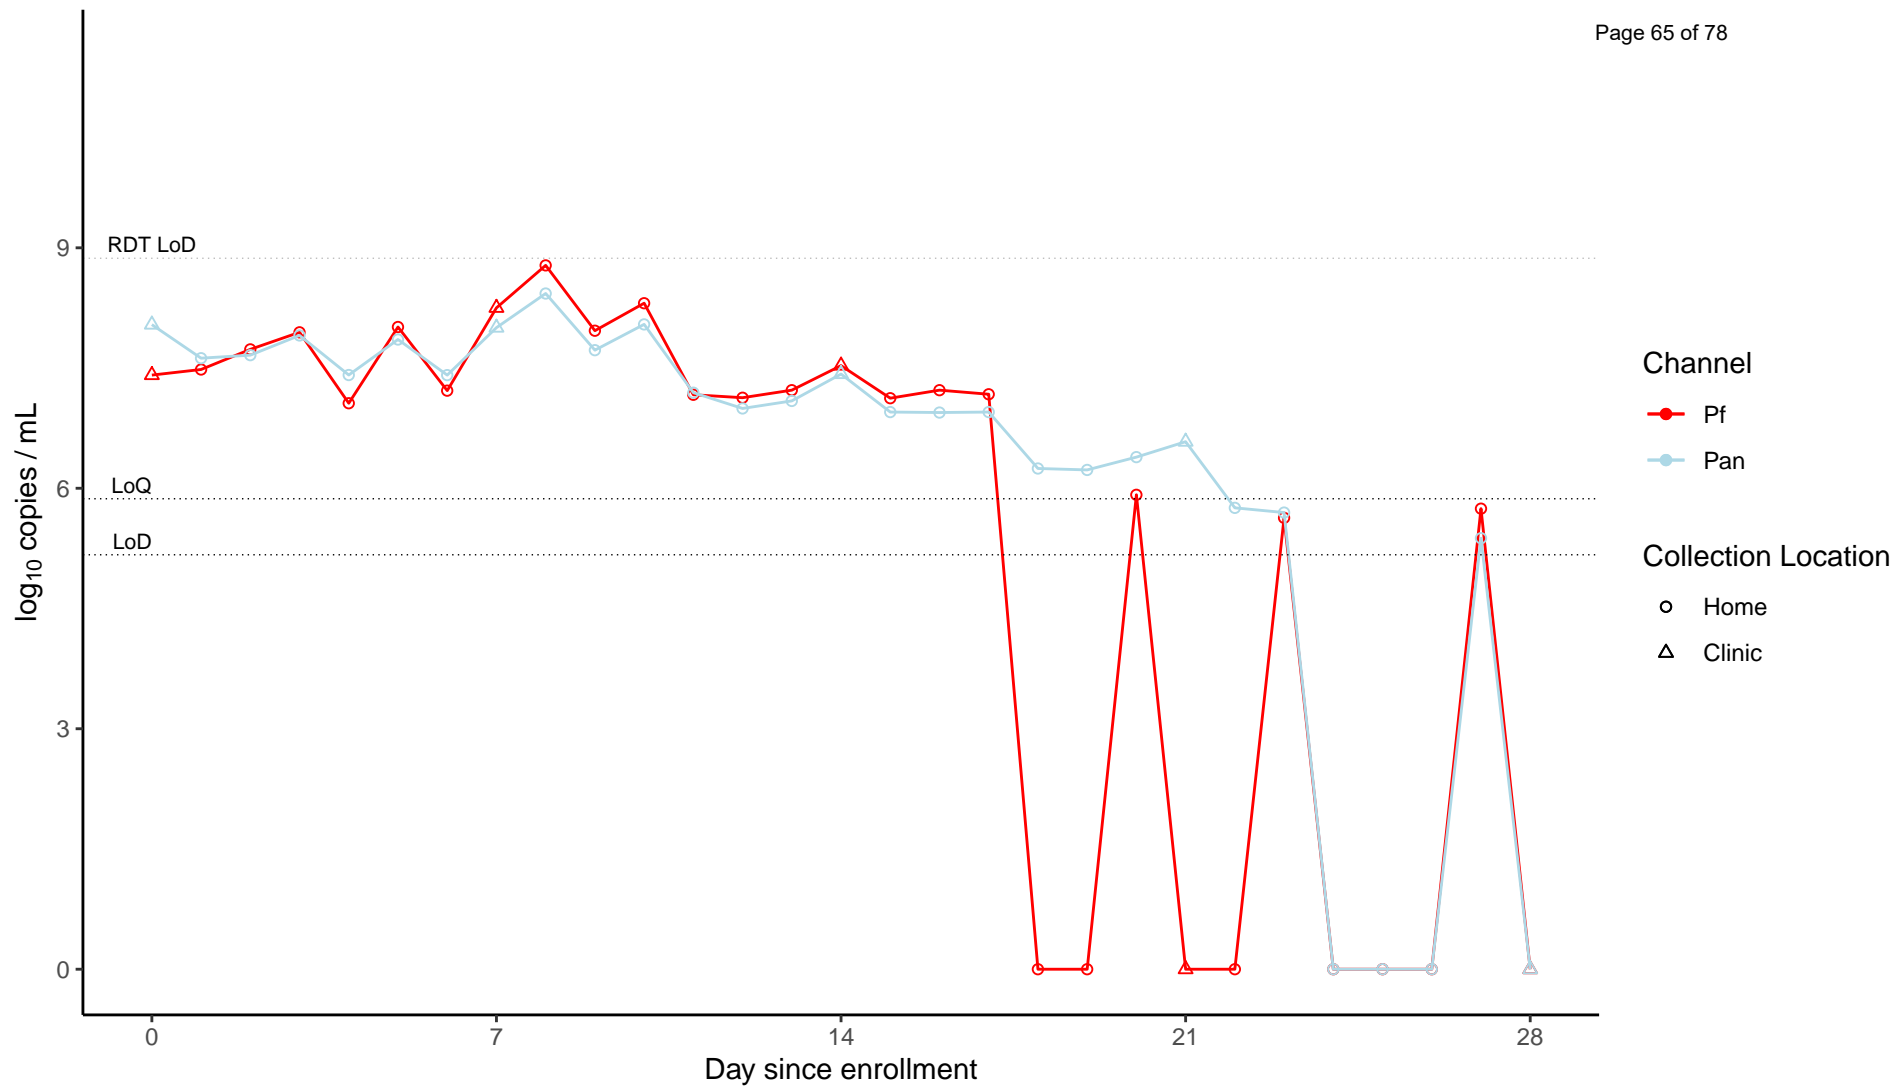

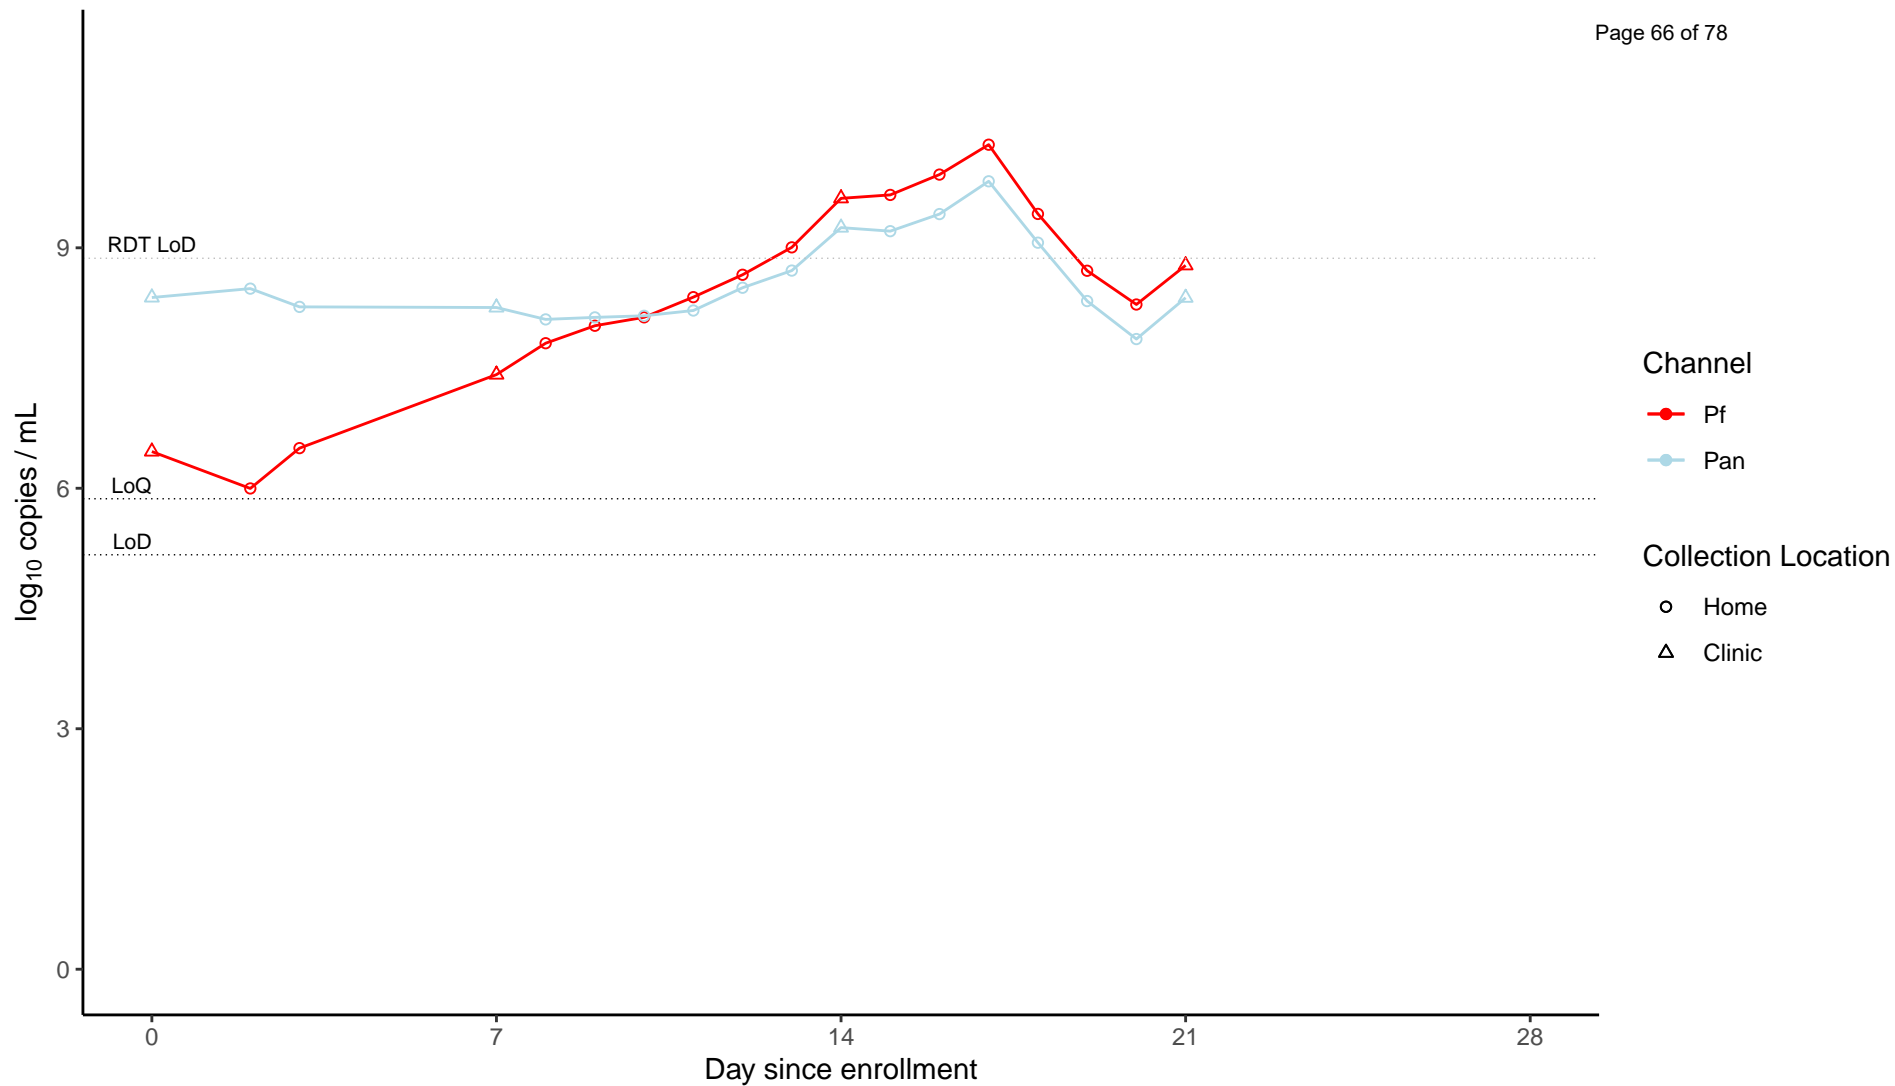

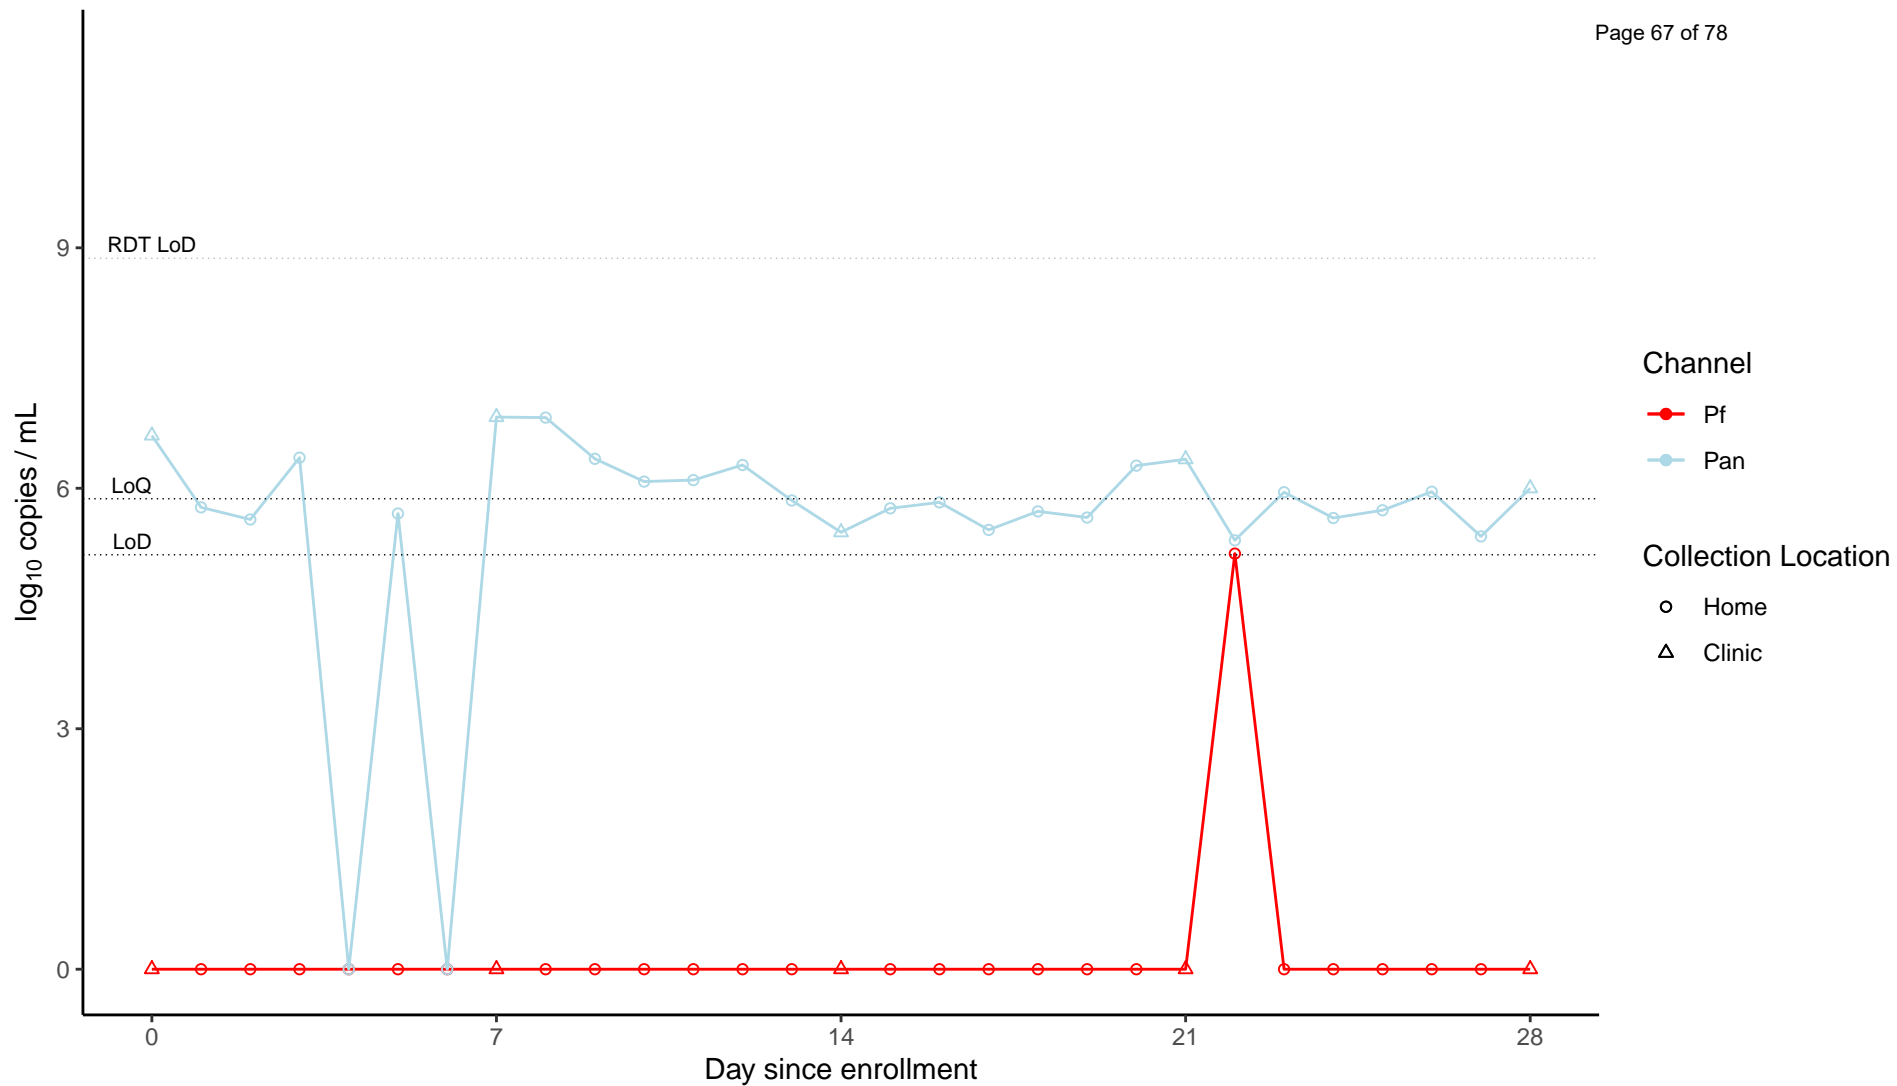

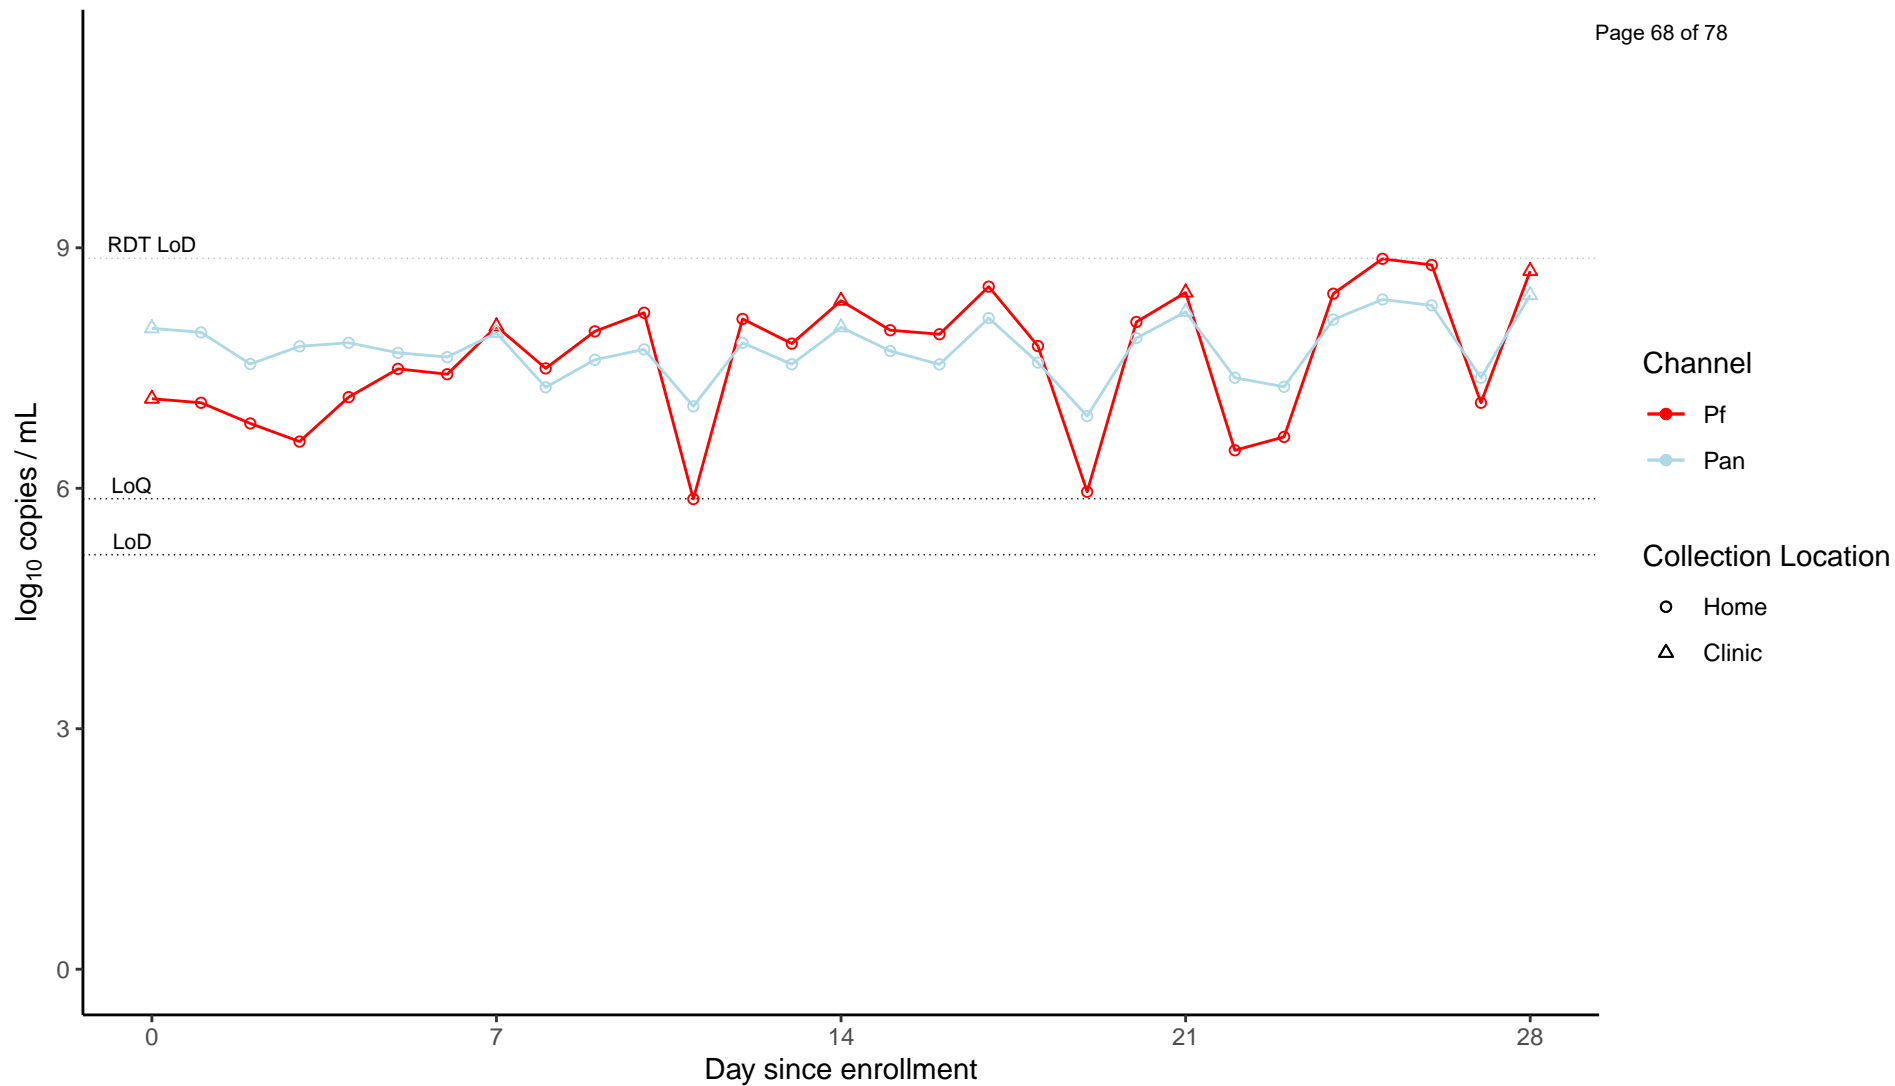

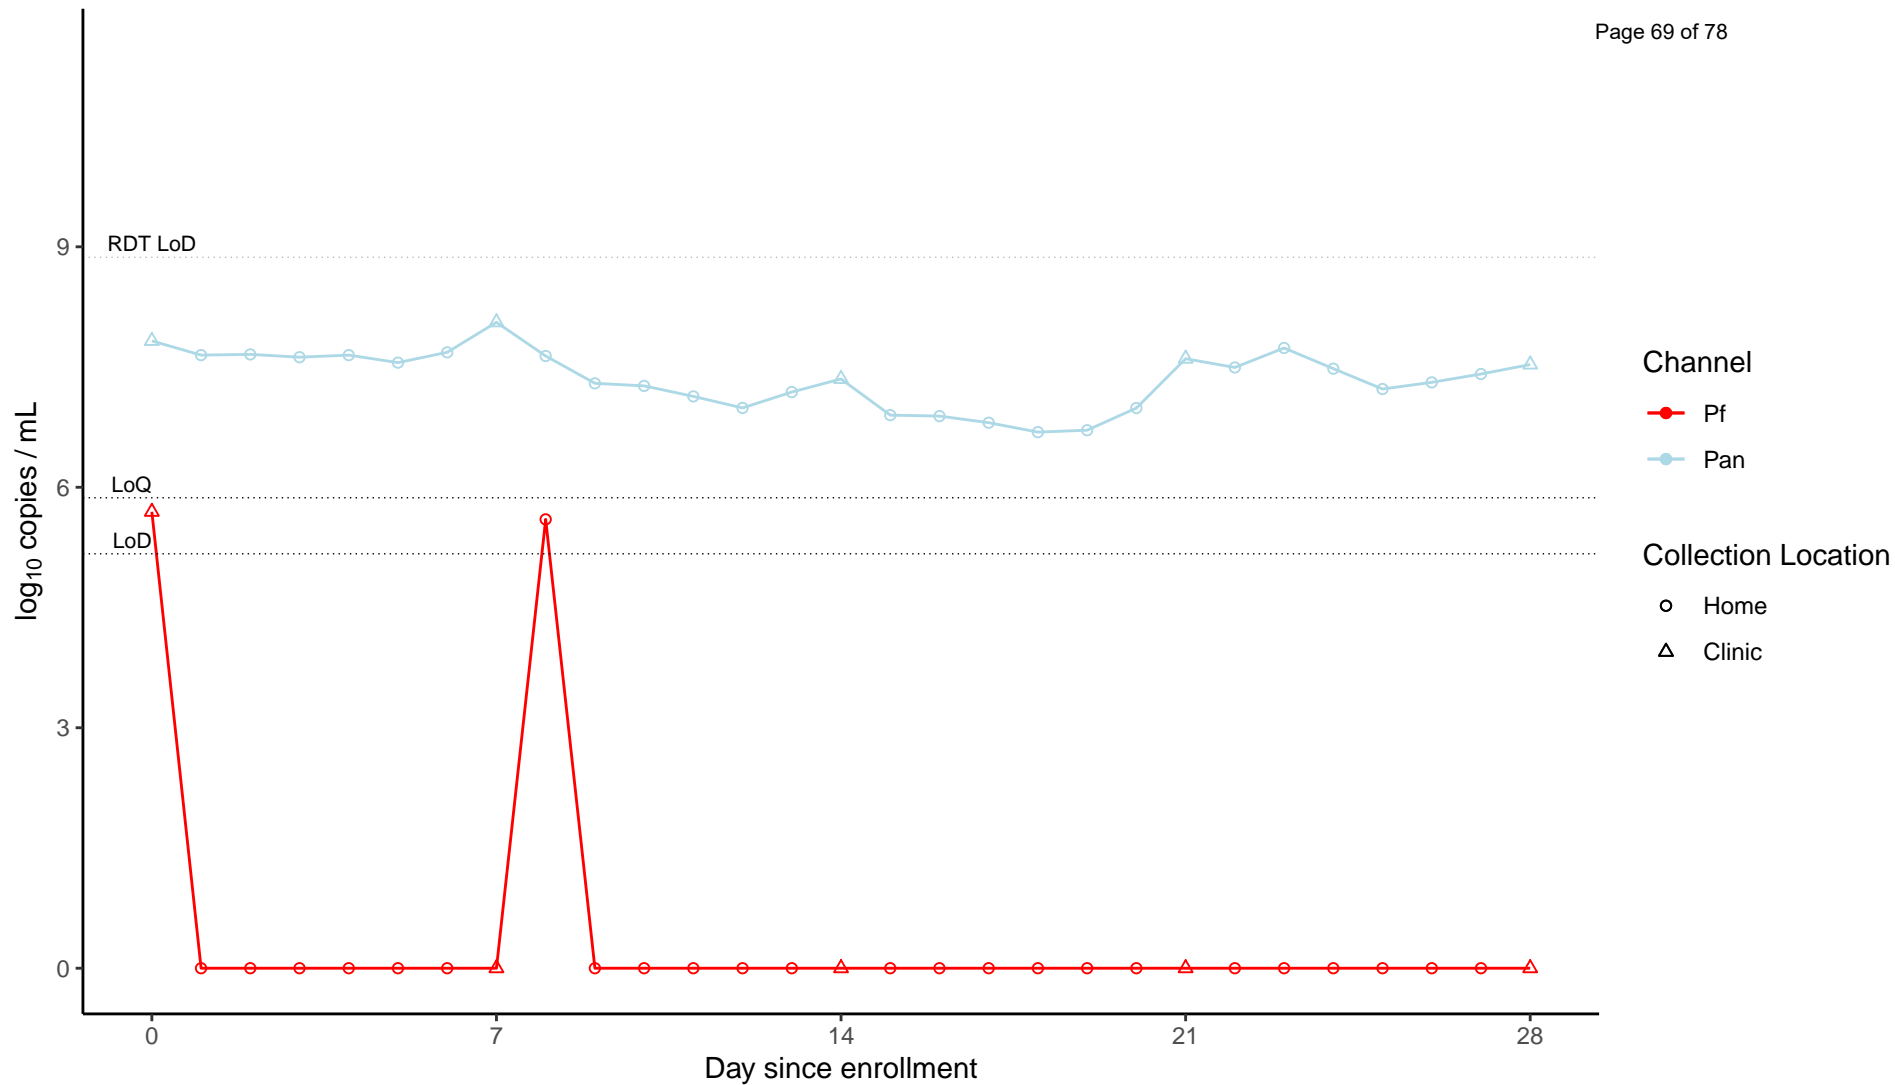

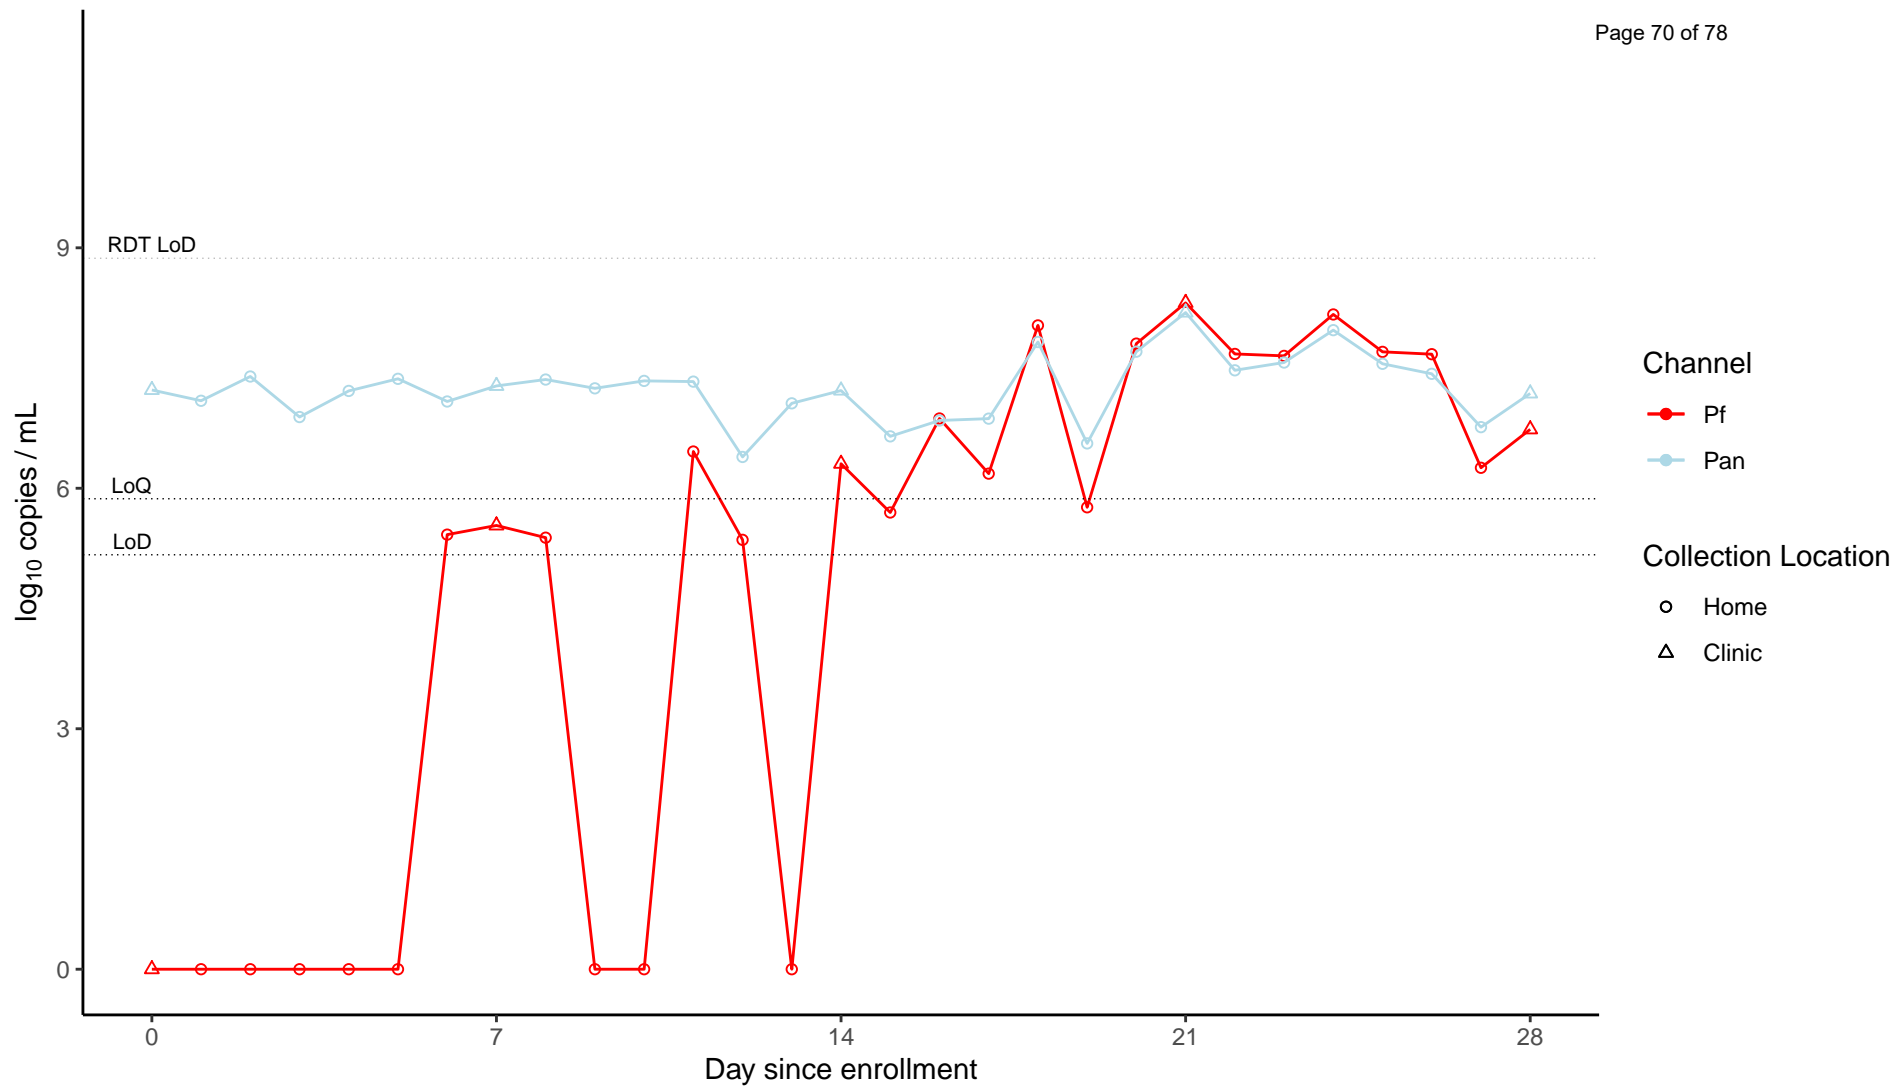

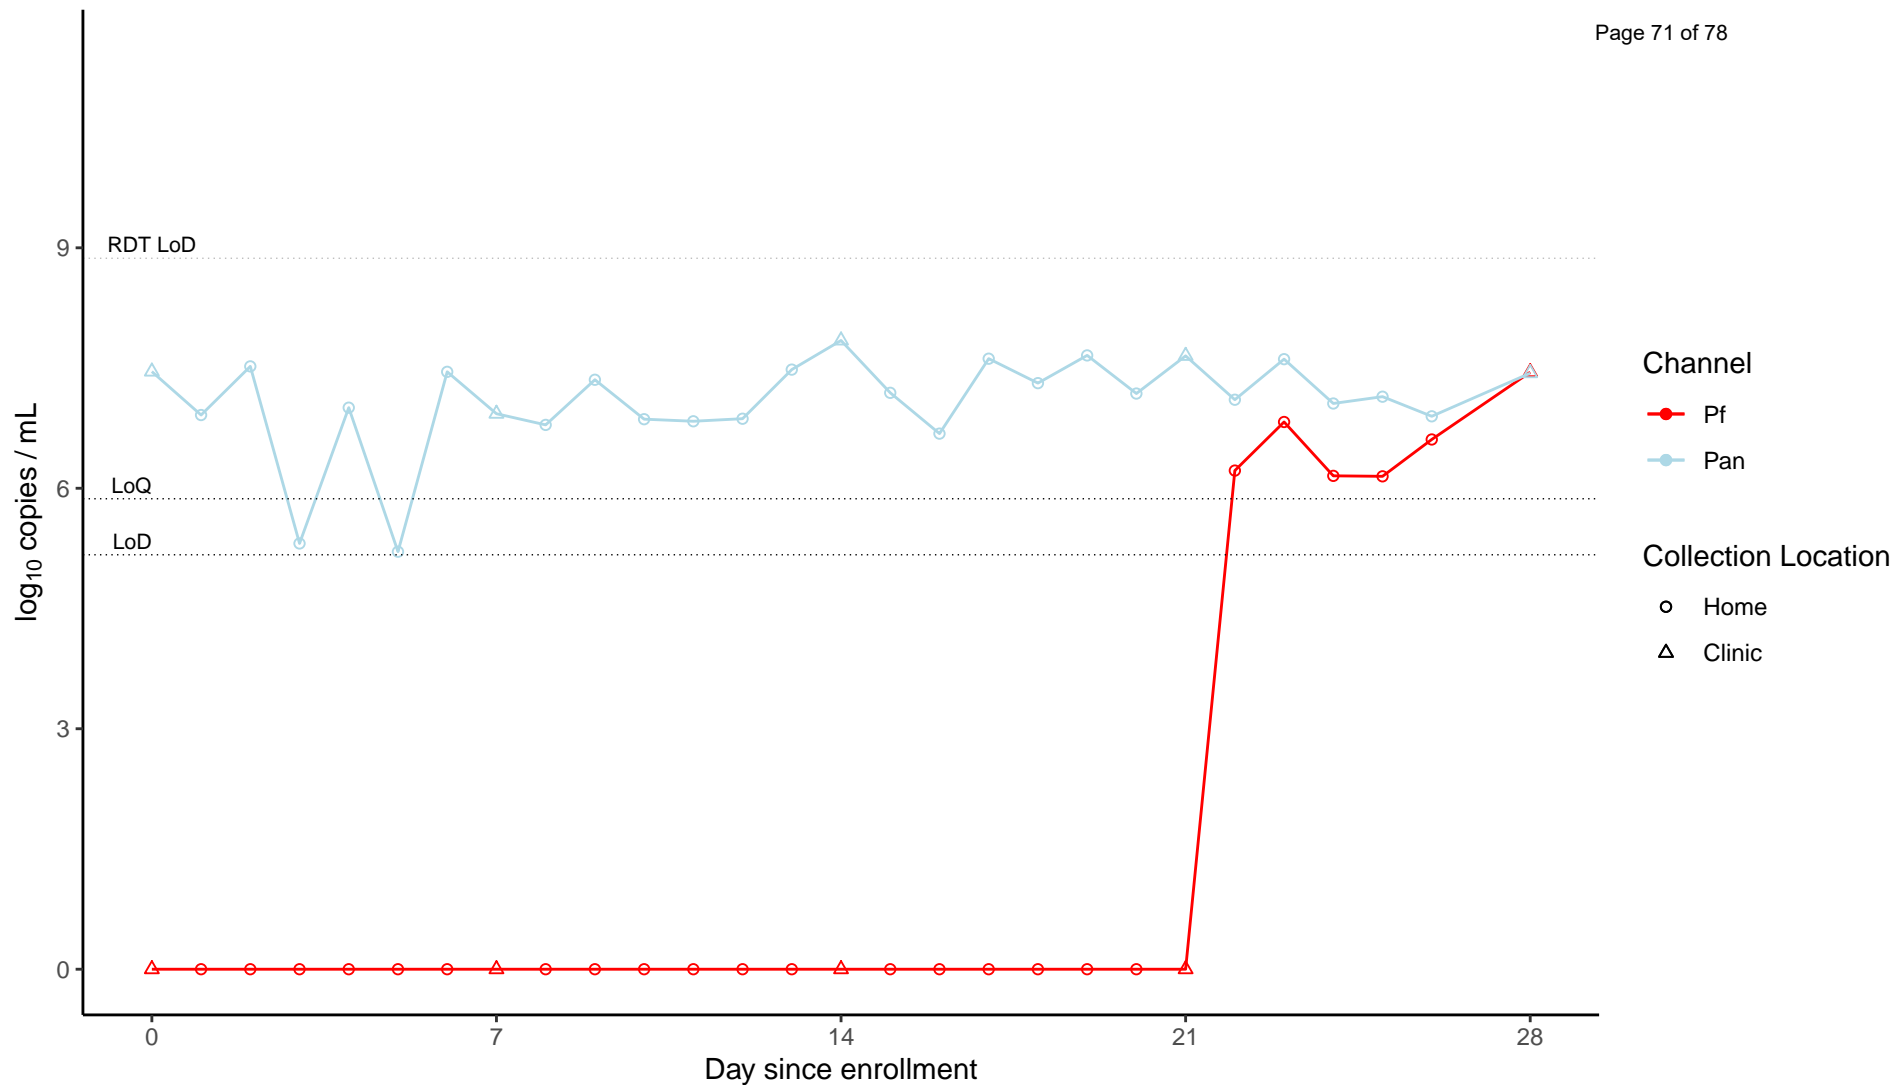



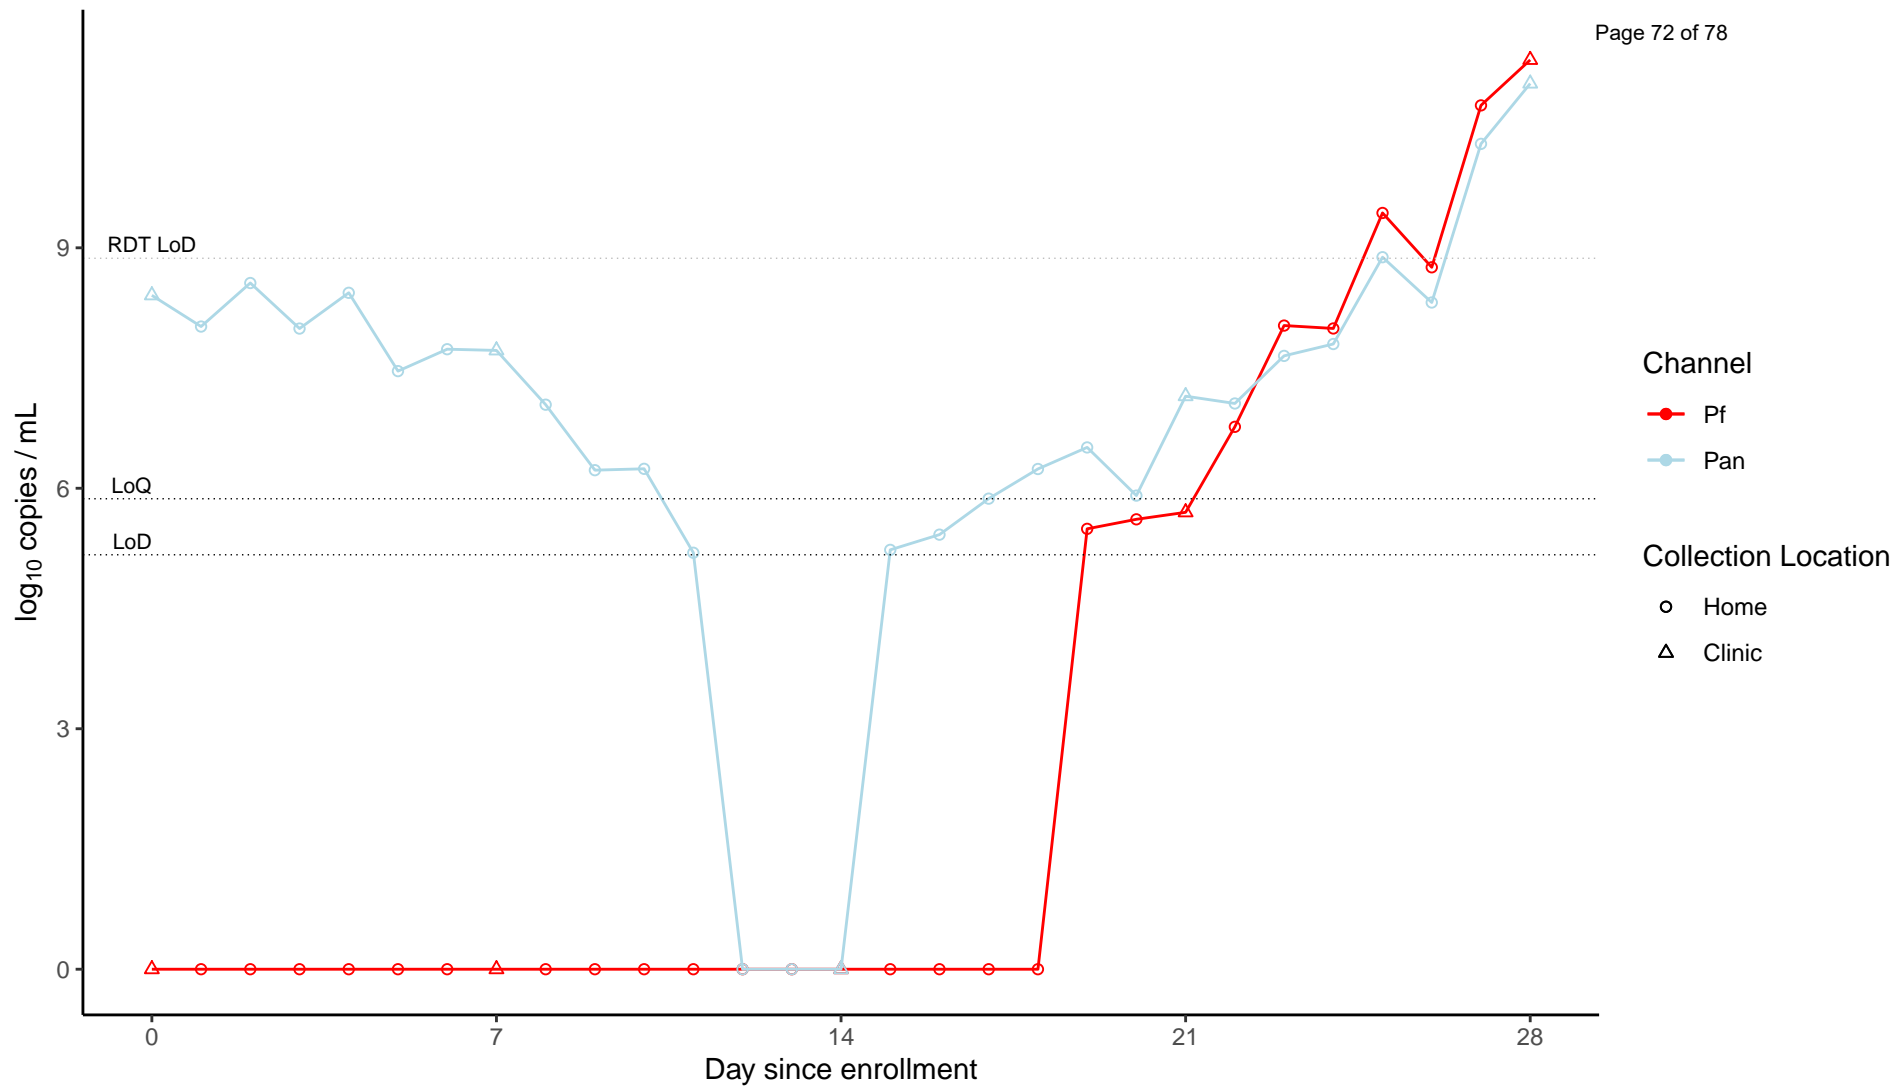

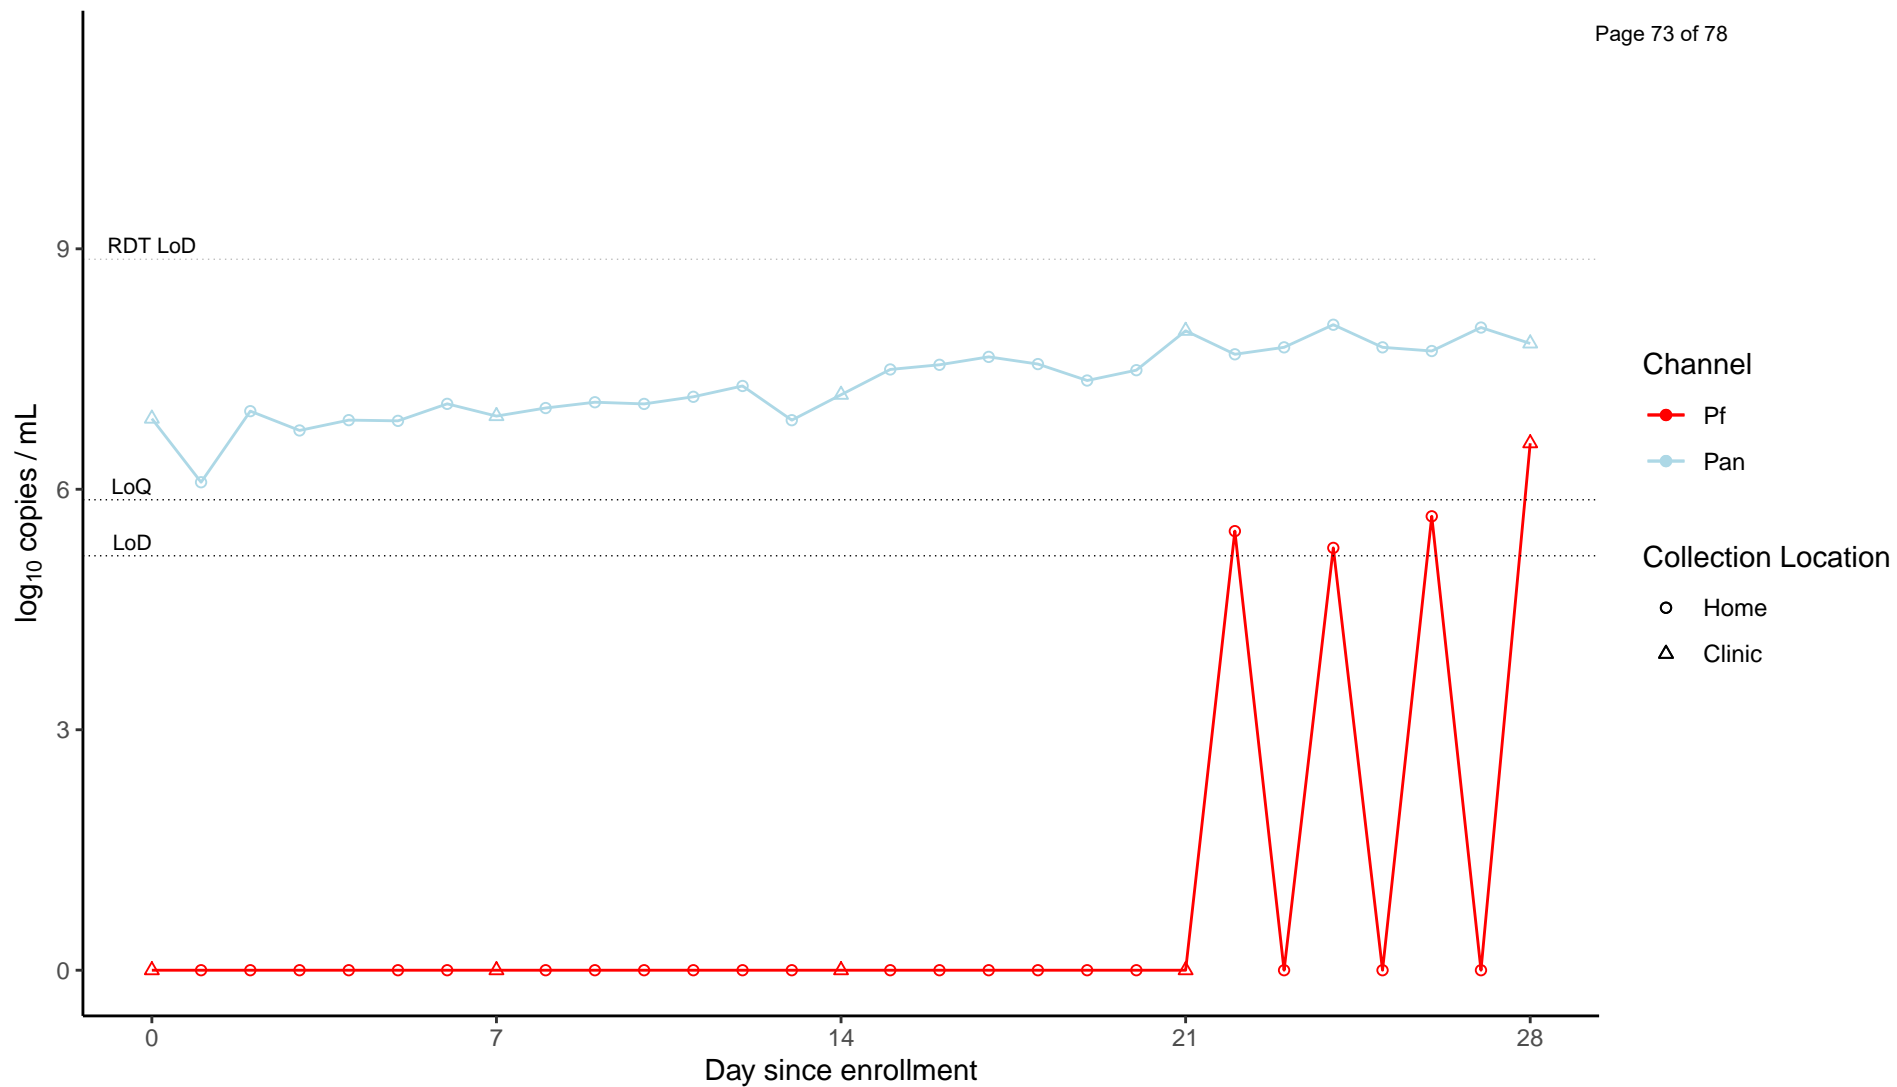

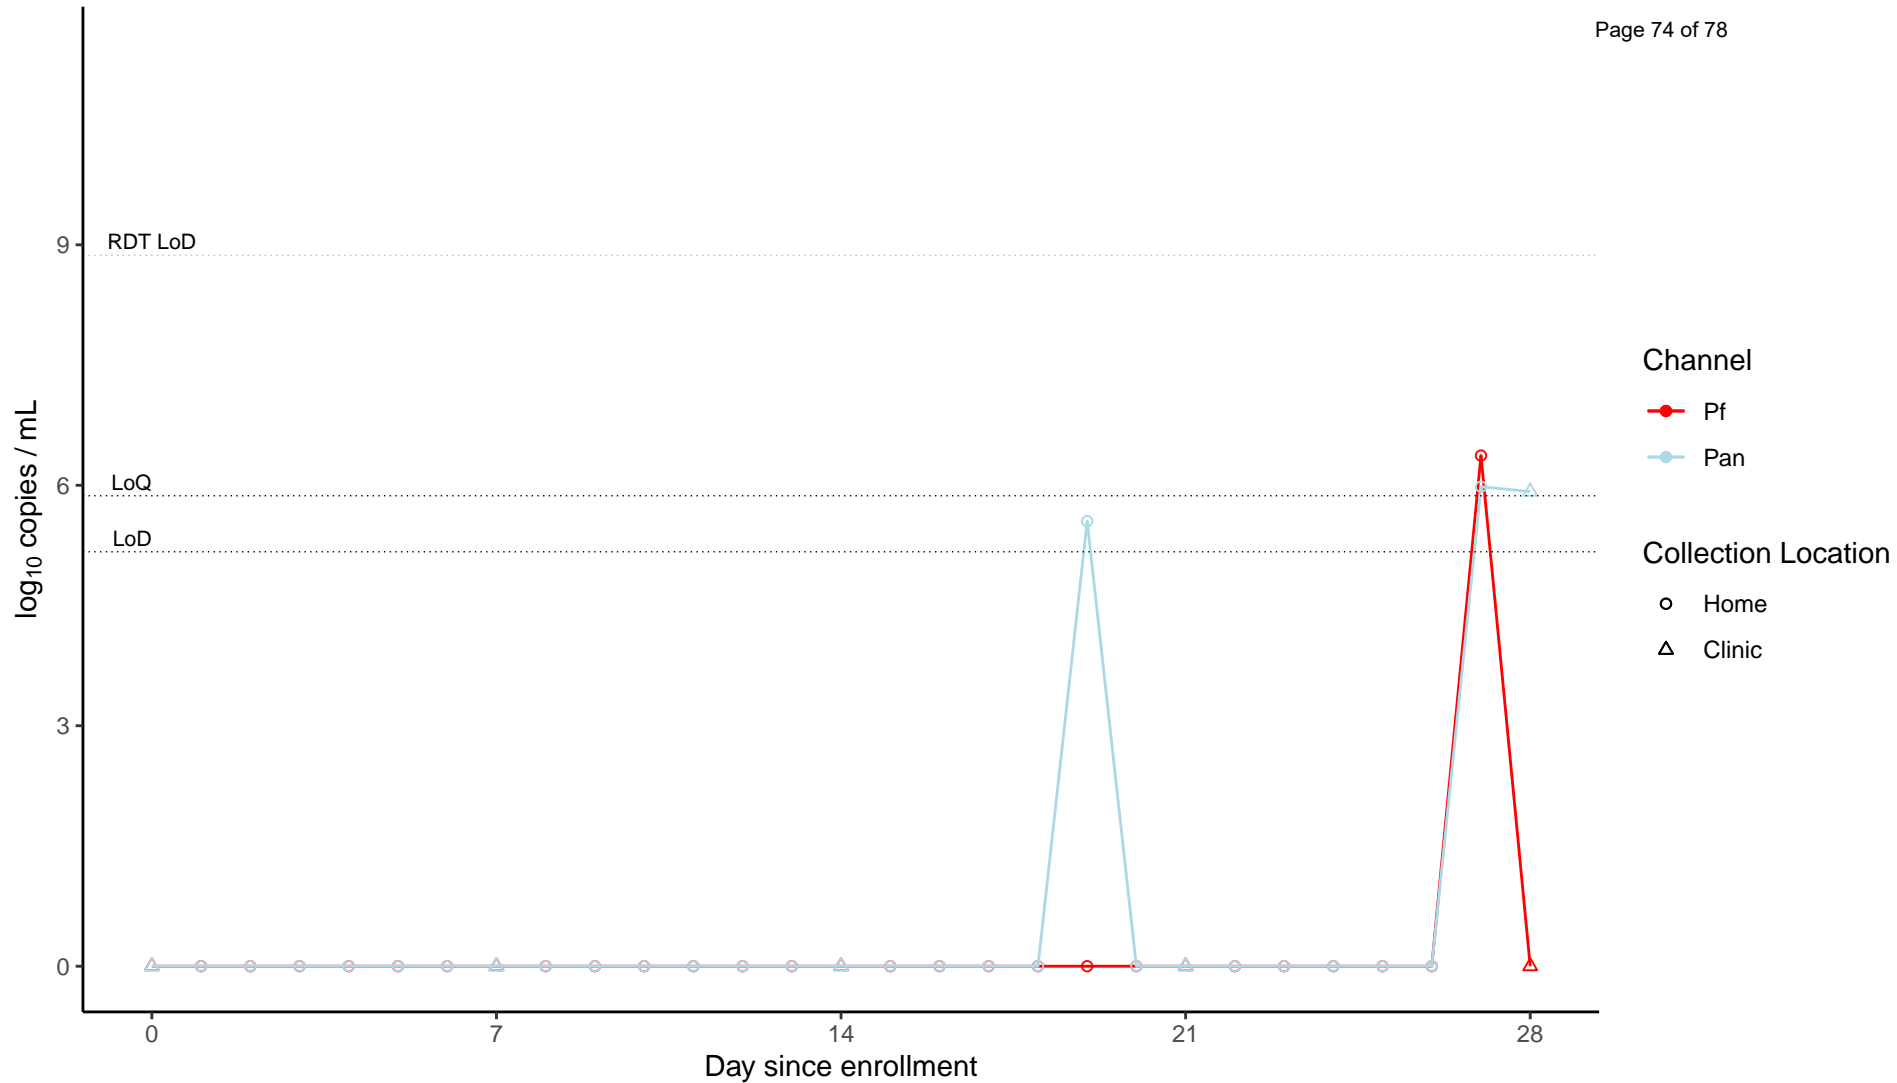

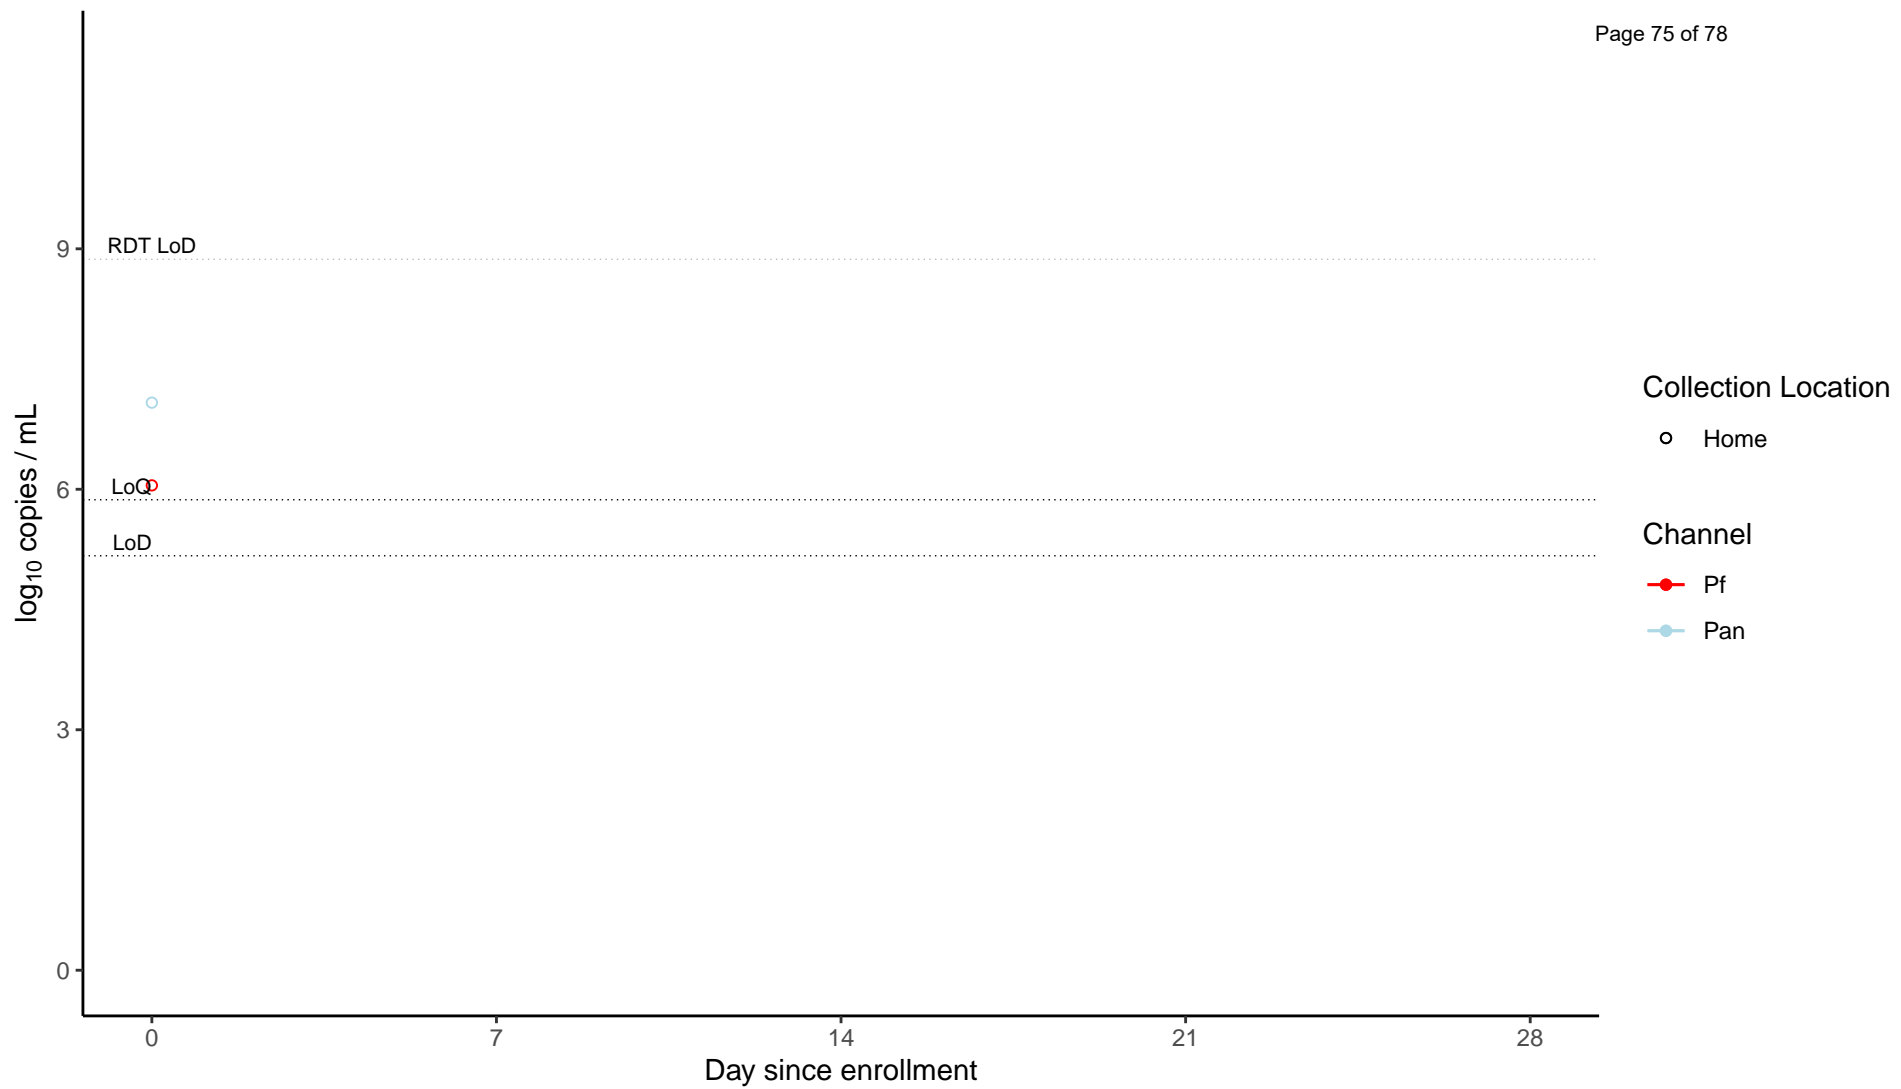

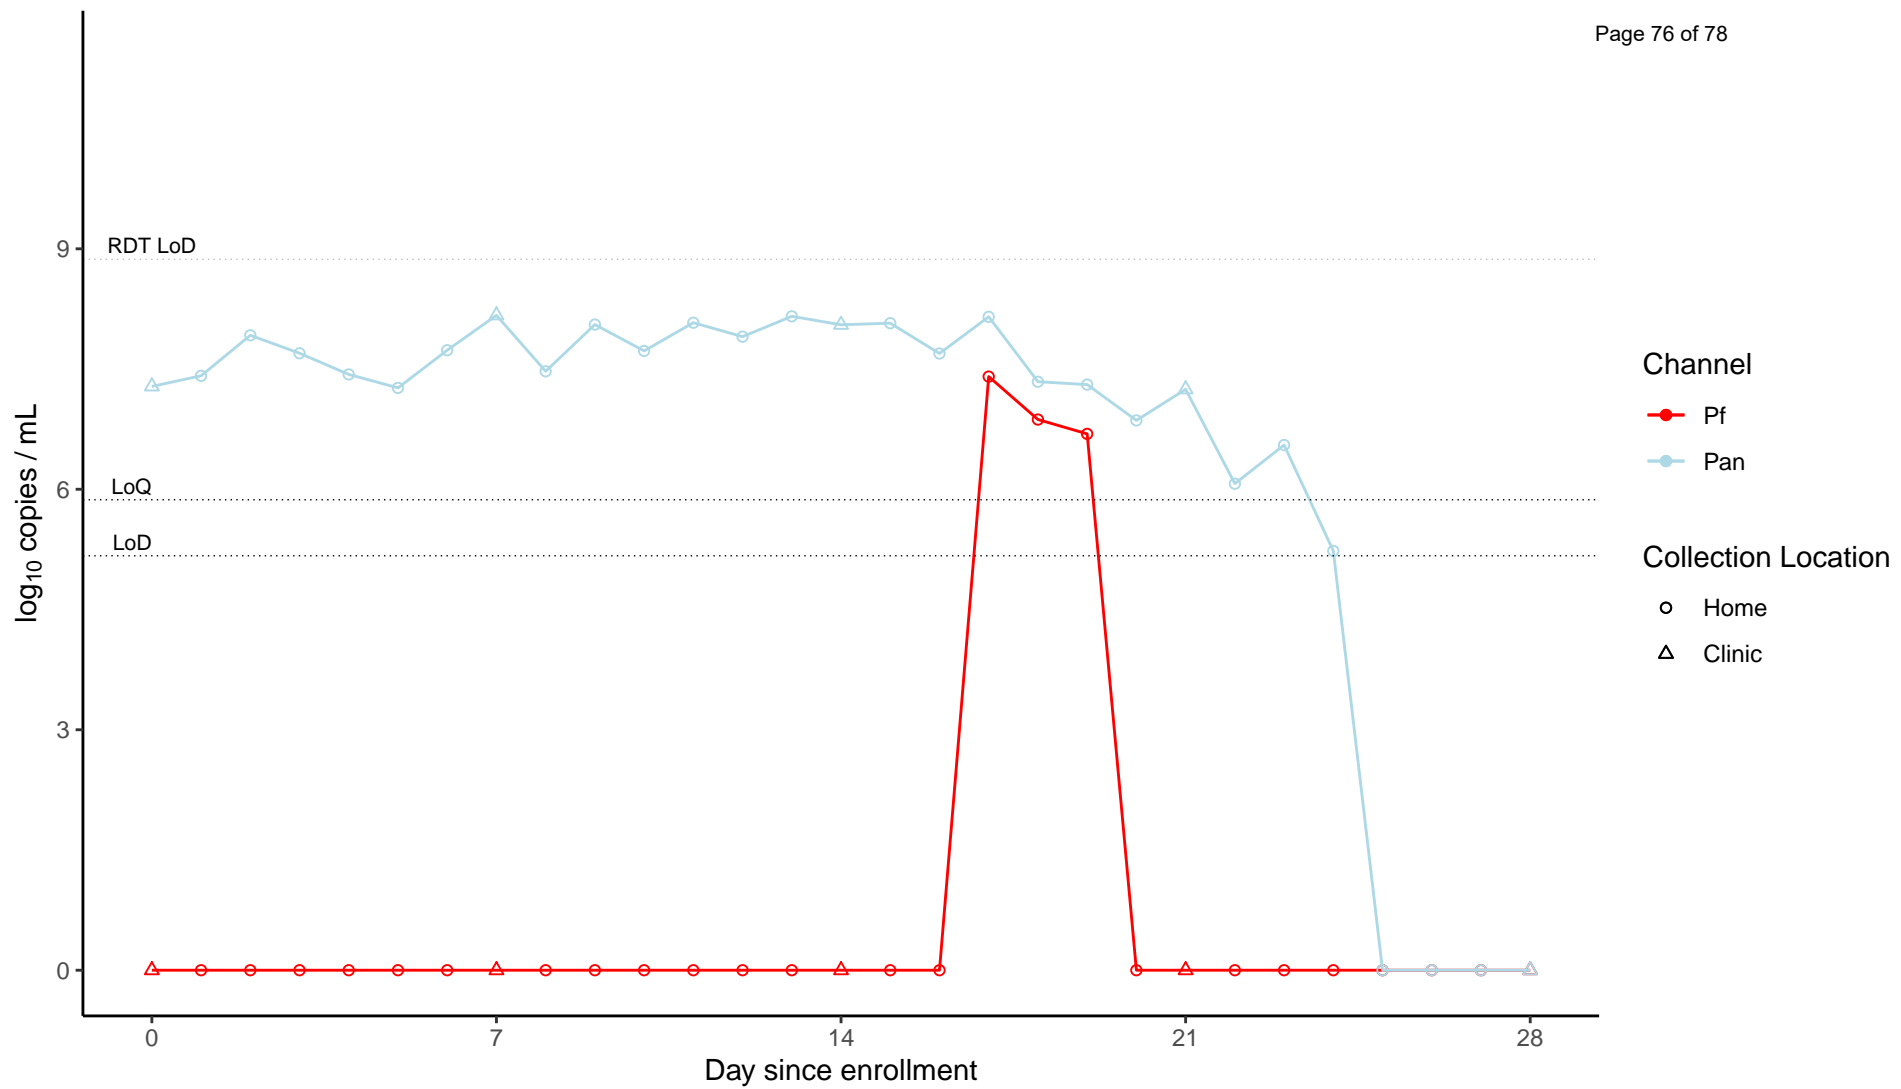

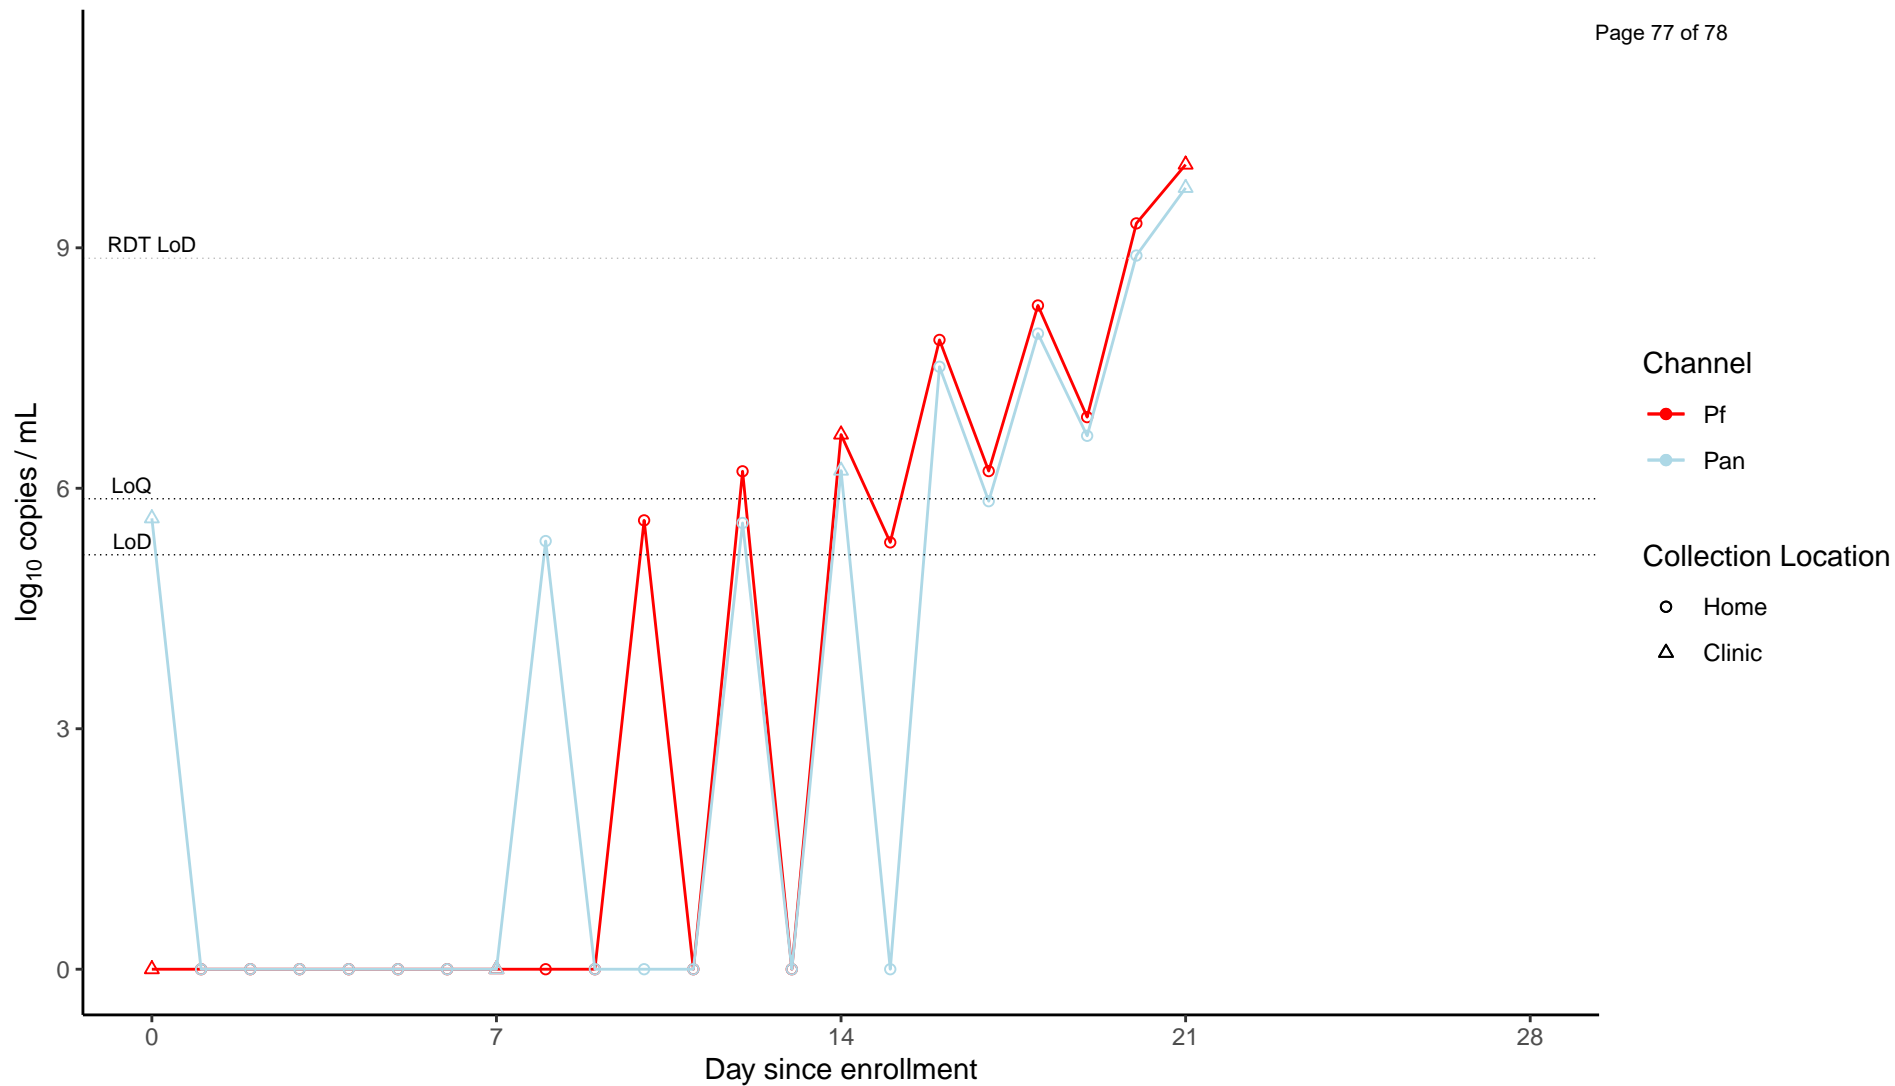

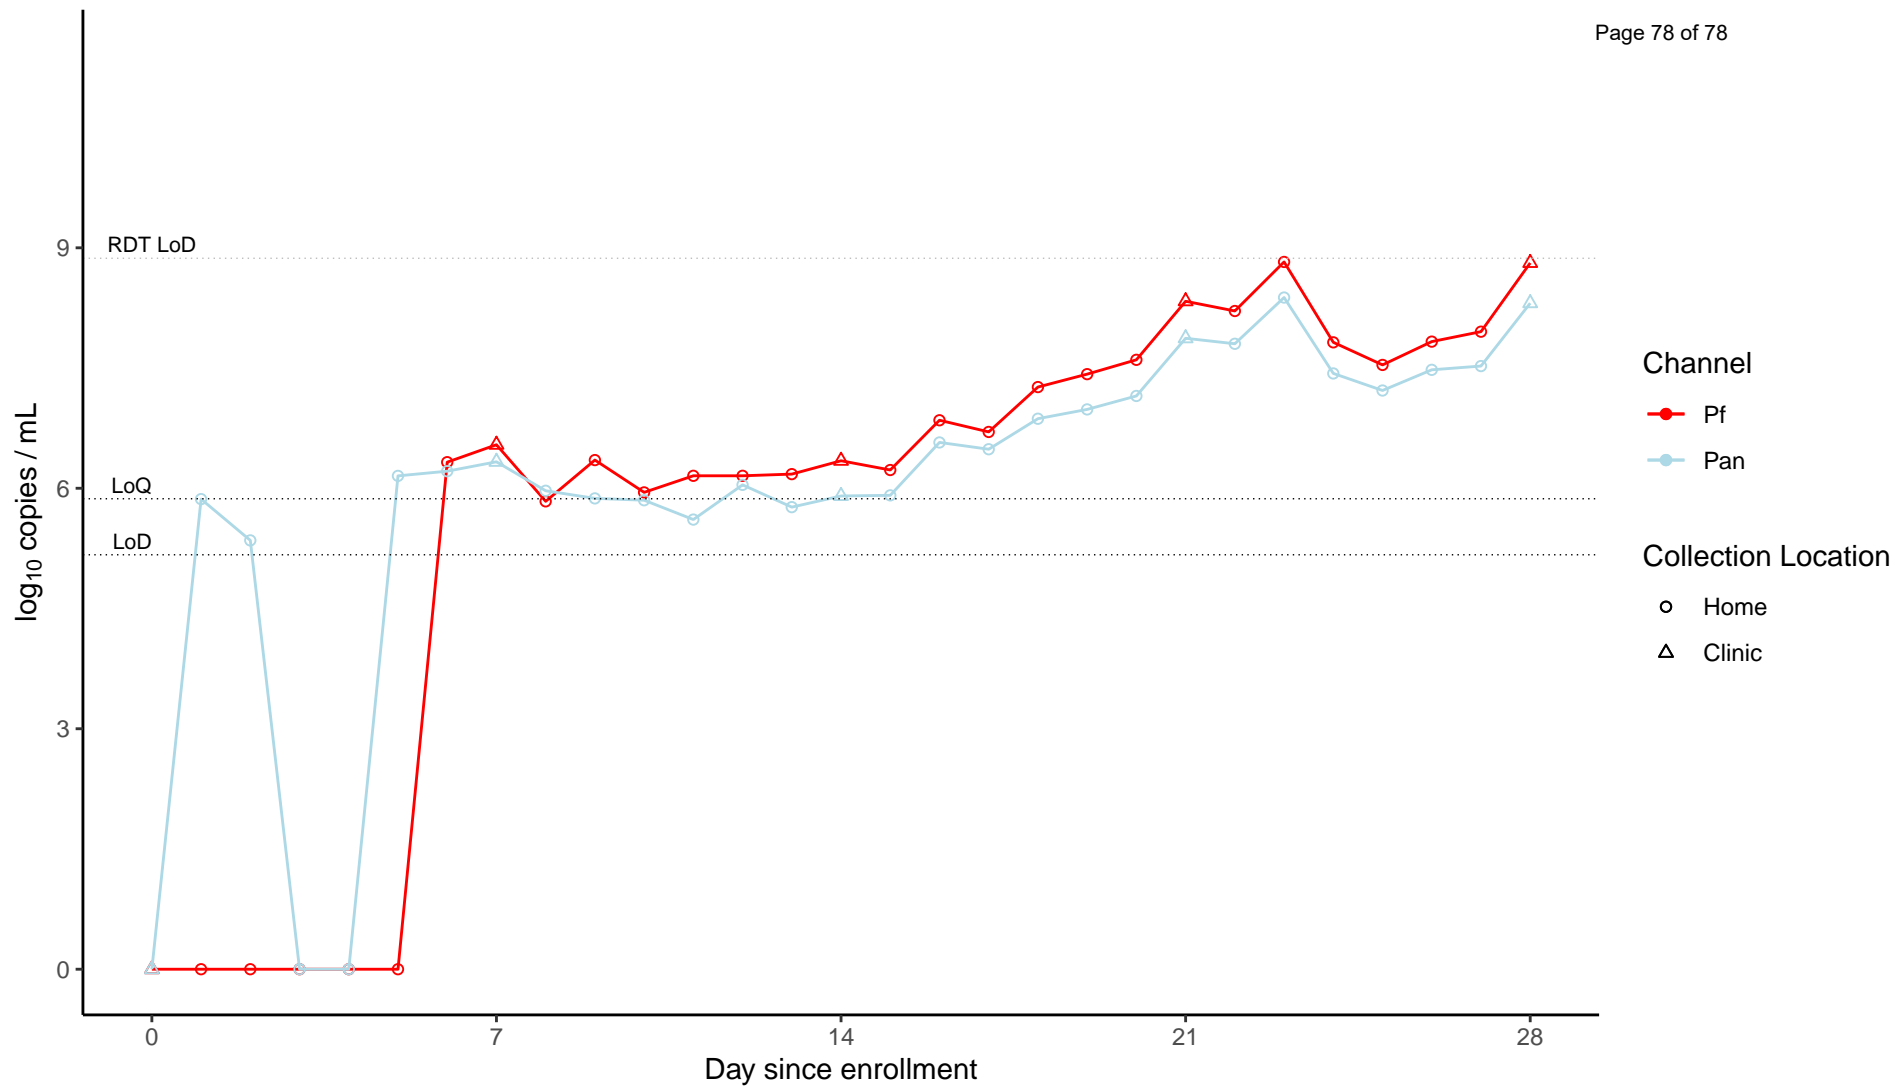

Supplement: mmc1.pdf [file mmc1.pdf]
